# Supplementary material for: Synthesis of chiral cyclobutanes via rhodium/diene-catalyzed asymmetric 1,4-addition: a dramatic ligand effect on the diastereoselectivity
Source: Royal Society of Chemistry journal article supplement (doi:10.1039/c5cc02023a), 2015-01-01

## Supporting Information

### Synthesis of chiral cyclobutanes via rhodium/diene-catalyzed asymmetric 1,4-addition: dramatic ligand effect on the diastereoselectivity

Ya-Jing Chen, Tian-Jiao Hu, Chen-Guo Feng,\* Guo-Qiang Lin

CAS Key Laboratory of Synthetic Chemistry of Natural Substances, Shanghai Institute of Organic Chemistry, Chinese Academy of Sciences, Shanghai 200032, P. R. China

#### Table of Contents

|                                                                                                    |     |
|----------------------------------------------------------------------------------------------------|-----|
| 1. General.....                                                                                    | S2  |
| 2. Preparation of diene ligands .....                                                              | S3  |
| 3. Preparation of cyclobut-1-enecarboxylic esters <b>1a-1h</b> .....                               | S3  |
| 4. General procedure for the rhodium-catalyzed arylation of cyclobut-1-enecarboxylate esters ..... | S6  |
| 5. Reduction of compound <b>3ha</b> .....                                                          | S20 |
| 6. Hydrolysis of compound <b>3ha</b> .....                                                         | S21 |
| 7. Allylation of compound <b>3ha</b> .....                                                         | S22 |
| 8. <sup>1</sup> H and <sup>13</sup> C NMR spectras .....                                           | S23 |

## 1. General.

All reagents were obtained commercially unless otherwise noted. All reactions and manipulations were performed using standard schlenk techniques under predried argon. Air- and moisture-sensitive solvents were distilled from Na immediately before use and were transferred via syringe. Organic solutions were concentrated under reduced pressure (ca. 20 mm Hg) by rotary evaporation. Chromatographic purification of products was accomplished using forced flow chromatography on silica gel 60 (40-63  $\mu\text{m}$ ). Thin layer chromatography was performed on silica gel 60 F<sub>254</sub> plates (250  $\mu\text{m}$ ). Visualization of the developed chromatogram was accomplished by fluorescence quenching and by staining with ethanolic anisaldehyde, aqueous potassium permanganate or aqueous ceric ammonium molybdate (CAM) solution. All chiral ligands were purchased from commercial sources or prepared according to the literature procedures<sup>1</sup>. All aryl boronic acid were purchased from commercial sources. Nuclear Magnetic Resonance (NMR) spectras were acquired on a Varian Mercury 400 operating at 400, 100 and 376 MHz for <sup>1</sup>H, <sup>13</sup>C, and <sup>19</sup>F, respectively. Chemical shifts are reported in  $\delta$  ppm referenced to an internal SiMe<sub>4</sub> standard for <sup>1</sup>H NMR, chloroform-d ( $\delta$  77.16) for <sup>13</sup>C NMR. <sup>19</sup>F NMR spectras are referenced internally using  $\alpha,\alpha,\alpha$ -trifluorotoluene as a standard ( $-63.72$  ppm). Datas for <sup>1</sup>H NMR are recorded as follows: chemical shift ( $\delta$ , ppm), multiplicity (s, singlet; d, doublet; t, triplet; q, quartet; m, multiplet; br s, broad), integration and coupling constant (Hz). Datas for <sup>13</sup>C NMR and <sup>19</sup>F NMR are reported in terms of chemical shift ( $\delta$ , ppm). Optical rotations were measured on a JASCO-P-1030 polarimeter.

---

1 a) Wang, Z.-Q.; Feng, C.-G.; Xu, M.-H.; Lin, G.-Q. *J. Am. Chem. Soc.* **2007**, *129*, 5336-5337. b) Feng, C.-G.; Wang, Z.-Q.; Tian, P.; Xu, M.-H.; Lin, G.-Q. *Chem. Asian J.* **2008**, *3*, 1511-1516. c) Zhang, S.-S.; Wang, Z.-Q.; Xu, M.-H.; Lin, G.-Q. *Org. Lett.* **2010**, *12*, 5546-5549.

## 2. Preparation of diene ligands

All diene-ligands were prepared according to the literature procedures<sup>1</sup>

### (3a*S*,6a*S*)-3,6-bis(3,5-difluorophenyl)-1,3a,4,6a-tetrahydropentalene L7

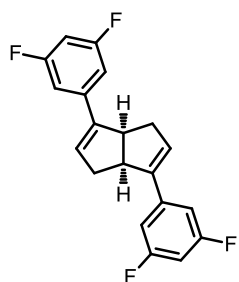

$[\alpha]_D^{20}$  +287.9 (*c* 0.83, CHCl<sub>3</sub>); m.p. 146-149 °C; <sup>1</sup>H NMR (400 MHz, CDCl<sub>3</sub>) δ 6.92-6.91 (m, 4H), 6.71-6.66 (m, 2H), 6.06-6.05 (m, 2H), 3.99-3.96 (m, 2H), 2.97-2.89 (m, 2H), 2.41-2.36 (m, 2H) ppm; <sup>13</sup>C NMR (100 MHz, CDCl<sub>3</sub>) δ 163.2 (dd, *J* = 13.1, 245.9 Hz), 143.5 (t, *J* = 2.7 Hz), 139.1 (t, *J* = 9.4 Hz), 127.3, 109.1 (dd, *J* = 6.8, 18.6 Hz), 102.4 (t, *J* = 25.5 Hz), 48.4, 38.5 ppm; <sup>19</sup>F NMR (376 MHz, CDCl<sub>3</sub>) δ -110.3 ppm; IR(KBr):

3435, 3089, 2920, 2854, 1623, 1586, 1471, 1446, 1425, 1342, 1186, 1117, 989, 858, 838, 798, 680, 533; HRMS (EI): *m/z* Exact mass calcd for C<sub>20</sub>H<sub>14</sub>F<sub>4</sub> [M]<sup>+</sup>: 330.1032, found: 330.1026.

### (3a*S*,6a*S*)-3,6-bis(4-(trifluoromethoxy)phenyl)-1,3a,4,6a-tetrahydropentalene L8

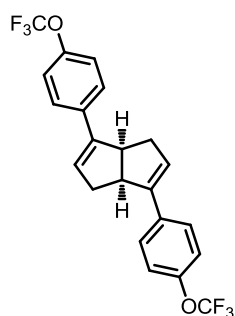

$[\alpha]_D^{20}$  +265.2 (*c* 0.12, CHCl<sub>3</sub>); m.p. 125-126 °C; <sup>1</sup>H NMR (400 MHz, CDCl<sub>3</sub>) δ 7.44 (d, *J* = 8.4 Hz, 4H), 7.18 (d, *J* = 8.0 Hz, 4H), 6.01-5.99 (m, 2H), 4.05-4.02 (m, 2H), 2.96-2.88 (m, 2H), 2.42-2.36 (m, 2H) ppm; <sup>13</sup>C NMR (100 MHz, CDCl<sub>3</sub>) δ 148.2 (q, *J* = 1.8 Hz), 144.0, 134.6, 127.6, 125.4, 121.1, 120.7 (q, *J* = 255.7 Hz), 48.6, 38.6 ppm; <sup>19</sup>F NMR (376 MHz, CDCl<sub>3</sub>) δ -57.9 ppm; IR(KBr): 3044, 2920, 2851, 1628, 1508, 1261, 1216, 1157, 1110, 1016, 911, 831, 805, 658; HRMS (EI): *m/z* Exact mass calcd

for C<sub>22</sub>H<sub>16</sub>O<sub>2</sub>F<sub>6</sub> [M]<sup>+</sup>: 426.1054, found: 426.1057.

## 3. Preparation of cyclobut-1-enecarboxylic esters 1a-1h

Cyclobut-1-enecarboxylate esters were prepared from corresponding alcohols or phenols and cyclobut-1-enecarboxylic acid according to the procedures reported in the literatures.<sup>2</sup>

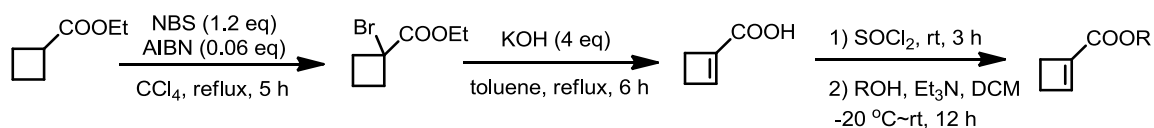

### Ethyl 1-bromocyclobutanecarboxylate<sup>2</sup>

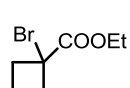

93% yield. Purified by chromatography on silica gel using 40/1 hexanes/ethyl acetate as eluent (colorless liquid): TLC *R<sub>f</sub>* = 0.35 (40% DCM/petroleum ether); <sup>1</sup>H NMR (400 MHz, CDCl<sub>3</sub>) δ 4.19 (q, *J* = 7.2 Hz, 2H), 2.88-2.81 (m, 2H), 2.59-2.52 (m, 2H),

2 a) Patent: US5849757 A1, 1998. b) Song, A.; Parker, K. A.; Sampson, N. S. *J. Am. Chem. Soc.* **2009**, *131*, 3444-3445.

2.20-2.10 (m, 1H), 1.86-1.76 (m, 1H), 1.25 (t,  $J = 7.2$  Hz, 3H) ppm; LRMS (EI):  $m/z$  207.

### Cyclobut-1-enecarboxylic acid<sup>2</sup>

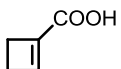 71% yield. Purified by chromatography on silica gel using 20/1 DCM/MeOH as eluent (colorless liquid): TLC  $R_f = 0.30$  (5% DCM/MeOH).  $^1\text{H}$  NMR (400 MHz,  $\text{CDCl}_3$ )  $\delta$  10.26 (br s, 1H), 6.87 (s, 1H), 2.69 (t,  $J = 2.8$  Hz, 2H), 2.44 (t,  $J = 2.8$  Hz, 2H) ppm; LRMS (ESI):  $m/z$  97.1  $[\text{M}-\text{H}]^+$ .

### Ethyl cyclobut-1-enecarboxylate 1a<sup>2a</sup>

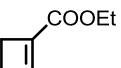 65% yield. Purified by chromatography on silica gel using 10% DCM/petroleum ether as eluent (colorless liquid): TLC  $R_f = 0.35$  (40% DCM/petroleum ether);  $^1\text{H}$  NMR (400 MHz,  $\text{CDCl}_3$ )  $\delta$  6.76-6.75 (m, 1H), 4.18 (q,  $J = 6.8$  Hz, 2H), 2.73-2.72 (m, 2H), 2.47-2.46 (m, 2H), 1.29 (t,  $J = 6.8$  Hz, 3H) ppm; IR (film)  $\nu$  2963, 2922, 2850, 1412, 1261, 1093, 1020, 865, 800, 702; HRMS (EI):  $m/z$  Exact mass calcd for  $\text{C}_7\text{H}_{10}\text{O}_2$   $[\text{M}]^+$ : 126.0681, found: 126.0682.

### Isopropyl cyclobut-1-enecarboxylate 1b

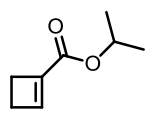 68% yield. Purified by chromatography on silica gel using 10% DCM/petroleum ether as eluent (colorless liquid): TLC  $R_f = 0.35$  (40% DCM/petroleum ether);  $^1\text{H}$  NMR (400 MHz,  $\text{CDCl}_3$ )  $\delta$  6.74-6.73 (m, 1H), 5.10-5.01 (m, 1H), 2.72-2.71 (m, 2H), 2.46-2.44 (m, 2H), 1.26 (d,  $J = 6.4$  Hz, 6H) ppm;  $^{13}\text{C}$  NMR (100 MHz,  $\text{CDCl}_3$ )  $\delta$  162.2, 146.0, 139.4, 67.5, 29.2, 27.0, 22.0 ppm; IR (film)  $\nu$  3459, 2983, 2941, 1725, 1456, 1376, 1262, 1215, 1183, 1164, 1105, 914, 804; HRMS (EI):  $m/z$  Exact mass calcd for  $\text{C}_8\text{H}_{12}\text{O}_2$   $[\text{M}]^+$ : 140.0837, found: 140.0840.

### Tert-butyl cyclobut-1-enecarboxylate 1c

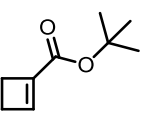 70% yield. Purified by chromatography on silica gel using 10% DCM/petroleum ether as eluent (colorless liquid): TLC  $R_f = 0.35$  (40% DCM/petroleum ether);  $^1\text{H}$  NMR (400 MHz,  $\text{CDCl}_3$ )  $\delta$  6.58-6.57 (m, 1H), 2.60 (t,  $J = 3.2$  Hz, 2H), 2.34-2.33 (m, 2H), 1.41 (s, 9H) ppm;  $^{13}\text{C}$  NMR (100 MHz,  $\text{CDCl}_3$ )  $\delta$  162.0, 145.0, 140.5, 80.2, 29.2, 28.2, 26.5 ppm; IR (film)  $\nu$  3454, 2979, 1724, 1478, 1458, 1394, 1370, 1258, 1159, 844, 803, 738, 702, 473; HRMS (EI):  $m/z$  Exact mass calcd for  $\text{C}_9\text{H}_{14}\text{O}_2$   $[\text{M}]^+$ : 154.0994, found: 154.0998.

### Benzyl cyclobut-1-enecarboxylate **1d**<sup>3</sup>

 72% yield. Purified by chromatography on silica gel using 10% DCM/petroleum ether as eluent (colorless liquid): TLC  $R_f = 0.35$  (40% DCM/petroleum ether);  $^1\text{H}$  NMR (400 MHz,  $\text{CDCl}_3$ )  $\delta$  7.30-7.23 (m, 5H), 6.74-6.73 (m, 1H), 5.11 (s, 2H), 2.68 (t,  $J = 3.2$  Hz, 2H), 2.41-2.39 (m, 2H) ppm;  $^{13}\text{C}$  NMR (100 MHz,  $\text{CDCl}_3$ )  $\delta$  162.2 (1C), 147.2 (1C), 138.6 (1C), 136.2 (1C), 128.7 (2C), 128.3 (3C), 65.9 (1C), 29.9 (1C), 27.3 (1C) ppm; IR (film)  $\nu$  3439, 3090, 3033, 2952, 1721, 1498, 1455, 1378, 1272, 1217, 1116, 750, 714, 698, 587; HRMS (EI):  $m/z$  Exact mass calcd for  $\text{C}_{12}\text{H}_{12}\text{O}_2$   $[\text{M}]^+$ : 188.0837, found: 188.0840.

### Phenyl cyclobut-1-enecarboxylate **1e**<sup>2b</sup>

 76% yield. Purified by chromatography on silica gel using 10% DCM/petroleum ether as eluent (colorless liquid): TLC  $R_f = 0.35$  (40% DCM/petroleum ether);  $^1\text{H}$  NMR (400 MHz,  $\text{CDCl}_3$ )  $\delta$  7.33-7.27 (m, 2H), 7.17-7.12 (m, 1H), 7.06-7.04 (m, 2H), 6.91 (t,  $J = 0.8$  Hz, 1H), 2.77 (t,  $J = 3.2$  Hz, 2H), 2.49-2.47 (m, 2H) ppm; IR (film)  $\nu$  3066, 2954, 1736, 1627, 1591, 1492, 1457, 1314, 1280, 1244, 1192, 1163, 1103, 1077, 1025, 1003, 906, 834, 742, 688, 501; HRMS (EI):  $m/z$  Exact mass calcd for  $\text{C}_{11}\text{H}_{10}\text{O}_2$   $[\text{M}]^+$ : 174.0681, found: 174.0685.

### 2,6-Dimethylphenyl cyclobut-1-enecarboxylate **1f**

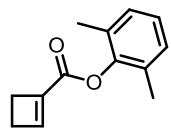 68% yield. Purified by chromatography on silica gel using 10% DCM/petroleum ether as eluent (colorless liquid): TLC  $R_f = 0.35$  (40% DCM/petroleum ether);  $^1\text{H}$  NMR (400 MHz,  $\text{CDCl}_3$ )  $\delta$  7.08-7.05 (m, 3H), 7.01-7.00 (m, 1H), 2.89-2.87 (m, 2H), 2.58-2.57 (m, 2H), 2.16 (s, 6H) ppm;  $^{13}\text{C}$  NMR (100 MHz,  $\text{CDCl}_3$ )  $\delta$  159.8, 149.0, 147.9, 137.9, 130.4, 128.6, 125.9, 29.5, 27.6, 16.4 ppm; IR (film)  $\nu$  3027, 2968, 2931, 1750, 1732, 1606, 1476, 1442, 1415, 1382, 1315, 1275, 1266, 1166, 1106, 922, 844, 790, 771, 762, 685, 534; HRMS (EI):  $m/z$  Exact mass calcd for  $\text{C}_{13}\text{H}_{14}\text{O}_2$   $[\text{M}]^+$ : 202.0994, found: 202.0997.

### 2,6-Diisopropylphenyl cyclobut-1-enecarboxylate **1g**

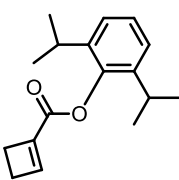 72% yield. Purified by chromatography on silica gel using 10% DCM/petroleum ether as eluent (colorless liquid): TLC  $R_f = 0.35$  (40% DCM/petroleum ether);  $^1\text{H}$  NMR (400 MHz,  $\text{CDCl}_3$ )  $\delta$  7.22-7.15 (m, 3H), 7.01-7.00 (m, 1H), 2.95-2.88 (m, 4H), 2.58-2.57 (m, 2H), 1.20 (d,  $J = 6.4$  Hz,

3 a) Collon, S.; Kouklovsky, C.; Langlois, Y. *Eur. J. Org. Chem.* **2002**, 3566-3572; b) Xu, H.-D.; Zhang, W.; Shu, D.-X.; Werness, J. B.; Tang, W.-P. *Angew. Chem. Int. Ed.* **2008**, *47*, 8933-8936.

12H) ppm;  $^{13}\text{C}$  NMR (100 MHz,  $\text{CDCl}_3$ )  $\delta$  160.6, 149.0, 145.4, 140.6, 138.1, 126.6, 124.0, 29.6, 27.7, 27.6, 27.0 ppm; IR (film)  $\nu$  3065, 2964, 2930, 2870, 1735, 1602, 1466, 1442, 1384, 1362, 1310, 1240, 1185, 1167, 1098, 1081, 941, 907, 791, 734, 689; HRMS (EI):  $m/z$  Exact mass calcd for  $\text{C}_{17}\text{H}_{22}\text{O}_2$   $[\text{M}]^+$ : 258.1620, found: 258.1617.

### 2,6-Diphenylphenyl cyclobut-1-enecarboxylate **1h**

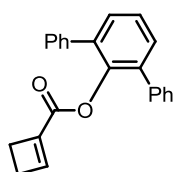

65% yield. Purified by chromatography on silica gel using 10% DCM/petroleum ether as eluent (white solid): TLC  $R_f$  = 0.35 (40% DCM/petroleum ether); m.p. 92-94 °C;  $^1\text{H}$  NMR (400 MHz,  $\text{CDCl}_3$ )  $\delta$  7.47-7.46 (m, 4H), 7.39-7.35 (m, 7H), 7.32-7.30 (m, 2H), 6.63-6.62 (m, 1H), 2.50 (t,  $J$  = 2.8 Hz, 2H), 2.32-2.28 (m, 2H) ppm;  $^{13}\text{C}$  NMR (100 MHz,  $\text{CDCl}_3$ )  $\delta$  159.7, 148.4, 144.9, 137.9, 137.6, 136.0, 130.2, 129.2, 128.3, 127.5, 126.6, 29.1, 27.4 ppm; IR(KBr): 3053, 3031, 2971, 2931, 1729, 1603, 1496, 1455, 1418, 1309, 1245, 1178, 1093, 1082, 1062, 973, 906, 758, 702, 682, 604, 517; LRMS (ESI):  $m/z$  327.2  $[\text{M}+\text{H}]^+$ ; HRMS (ESI):  $m/z$  Exact mass calcd for  $\text{C}_{23}\text{H}_{18}\text{NaO}_2$   $[\text{M}+\text{Na}]^+$ : 349.1199, found: 349.1200.

## 4. General procedure for the rhodium-catalyzed arylation of cyclobut-1-enecarboxylate esters

Under argon atmosphere, cyclobut-1-enecarboxylate esters (0.2 mmol), boron reagent (0.4 mmol, 2 equiv), and catalyst  $[\text{Rh}(\text{OH})(\text{S,S})(\text{L})]_2$  (0.003 mmol, 0.015 equiv) or  $[\text{Rh}(\text{C}_2\text{H}_4)\text{Cl}]_2$  (0.003 mmol, 0.015 equiv) and diene ligand (0.0066 mmol, 0.033 equiv) were dissolved in 2 mL toluene in a schlenk tube. To this yellow solution was added 2M aqueous KOH (0.2 mL, 0.4 mmol, 2 equiv). The mixture was stirred at 30 °C or 50 °C for 1 d. Solvent was concentrated under reduced pressure. Purification of this residue by chromatography on silica gel furnished the desired product. The enantiomeric excess (ee) was determined by chiral HPLC analysis.

### (1S, 2S)-Ethyl-2-phenylcyclobutanecarboxylate **3aa**

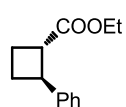

61% yield. Purified by chromatography on silica gel using 15% DCM/petroleum ether as eluent (colorless liquid): TLC  $R_f$  = 0.35 (40% DCM/petroleum ether);  $^1\text{H}$  NMR (400 MHz,  $\text{CDCl}_3$ )  $\delta$  7.33-7.18 (m, 5H), 4.16 (q,  $J$  = 7.2 Hz, 2H), 3.82-3.76 (m, 1H), 3.21-3.14 (m, 1H), 2.33-2.25 (m, 2H), 2.19-2.11 (m, 2H), 1.26 (t,  $J$  = 7.2 Hz, 3H) ppm;  $^{13}\text{C}$  NMR (100 MHz,  $\text{CDCl}_3$ )  $\delta$  174.6, 143.8, 128.5, 126.5, 126.4, 60.6, 45.6, 43.2, 25.4, 21.8, 14.4 ppm; IR (film)  $\nu$  3085, 3061, 3028, 2963, 2871, 1729, 1603, 1496, 1446, 1375, 1261, 1242, 1163, 1095, 1040, 861, 800, 753, 698, 536; HRMS (EI):  $m/z$  Exact mass calcd for  $\text{C}_{13}\text{H}_{16}\text{O}_2$   $[\text{M}]^+$ :

204.1150, found: 204.1148; enantiomeric excess was determined by HPLC with a Chiralcel OJ-H-AS-H column (*n*-hexane/*i*-propanol = 99/1, 0.5 mL/min, 210 nm, 25 °C);  $t_r(R, S) = 24.935$  min,  $t_r(S, R) = 27.187$  min,  $t_r(R, R) = 42.832$  min,  $t_r(S, S) = 46.578$  min; ee (trans) = 21%, ee (cis) = 34%.

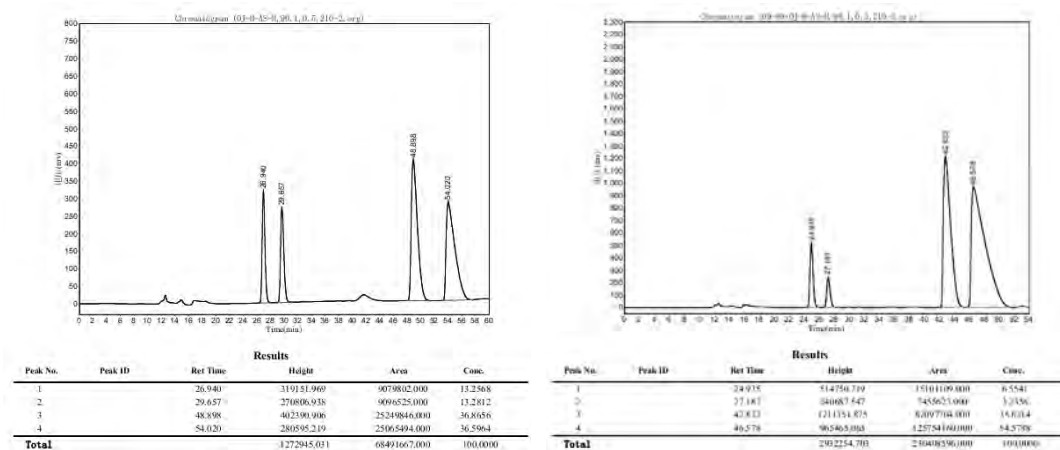

### (1*S*, 2*S*)-Isopropyl 2-phenylcyclobutanecarboxylate **3ba**

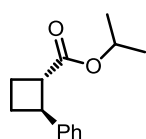

50% yield. Purified by chromatography on silica gel using 15% DCM/petroleum ether as eluent (colorless liquid): TLC  $R_f = 0.35$  (40% DCM/petroleum ether);  $^1\text{H}$  NMR (400 MHz,  $\text{CDCl}_3$ )  $\delta$  7.26-7.22 (m, 2H), 7.19-7.11 (m, 3H), 5.01-4.92 (m, 1H), 3.74-3.67 (m, 1H), 3.09-3.03 (m, 1H), 2.25-2.15 (m, 2H), 2.11-2.04 (m, 2H), 1.17 (d,  $J = 6.0$  Hz, 6H) ppm;  $^{13}\text{C}$  NMR (100 MHz,  $\text{CDCl}_3$ )  $\delta$  174.1, 143.9, 128.4, 126.5, 126.4, 67.8, 45.9, 43.2, 25.2, 22.0, 21.99, 21.8 ppm; IR (film)  $\nu$  2963, 2917, 2849, 1732, 1413, 1261, 1020, 865, 800, 700; HRMS (EI):  $m/z$  Exact mass calcd for  $\text{C}_{14}\text{H}_{18}\text{O}_2$   $[\text{M}]^+$ : 218.1307, found: 218.1306; enantiomeric excess was determined by HPLC with a Chiralcel OJ-H column (*n*-hexane/*i*-propanol = 95/5, 0.5 mL/min, 214 nm, 25 °C);  $t_r(R, S) = 8.862$  min,  $t_r(S, R) = 9.543$  min,  $t_r(R, R) = 11.093$  min,  $t_r(S, S) = 12.805$  min; ee (trans) = 24%, ee (cis) = 62%.

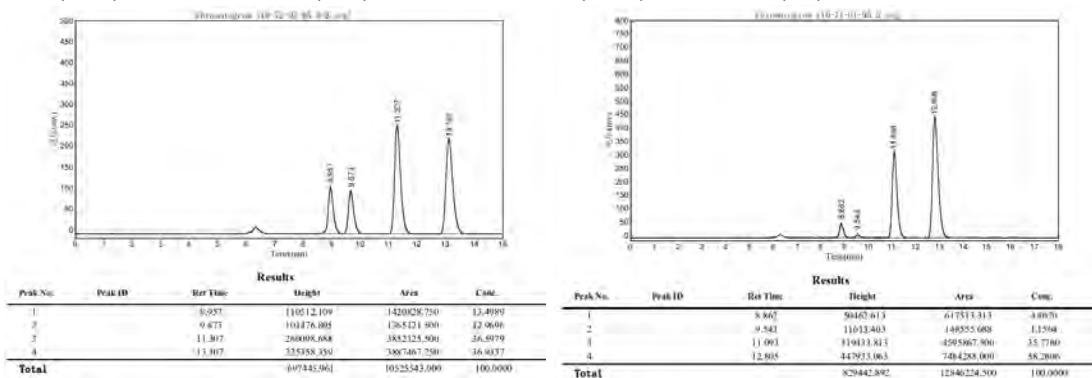

### (1*S*, 2*S*)-Tert-butyl 2-phenylcyclobutanecarboxylate 3ca

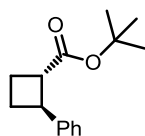

50% yield. Purified by chromatography on silica gel using 15% DCM/petroleum ether as eluent (colorless liquid): TLC  $R_f = 0.35$  (40% DCM/petroleum ether); the trans diastereomer and cis diastereomer can't be separated by chromatography on silica gel.  $^1\text{H}$  NMR (400 MHz,  $\text{CDCl}_3$ )  $\delta$  peaks attributed to the trans diastereomer: 7.26-7.09 (m, 5H), 3.69-3.62 (m, 1H), 3.04-2.98 (m, 1H), 2.20-2.00 (m, 4H), 1.38 (s, 9H) ppm; peaks attributed to the cis diastereomer: 7.26-7.09 (m, 5H), 3.90-3.83 (m, 1H), 3.38-3.33 (m, 1H), 2.54-2.00 (m, 4H), 0.96 (s, 9H) ppm;  $^{13}\text{C}$  NMR (100 MHz,  $\text{CDCl}_3$ )  $\delta$  peaks attributed to the trans diastereomer: 174.0, 144.1, 128.4, 127.8, 126.5, 80.3, 46.8, 43.3, 28.3, 25.0, 21.7 ppm; peaks attributed to the cis diastereomer: 172.8, 141.4, 128.1, 126.4, 126.3, 79.9, 45.5, 42.6, 27.8, 24.2, 20.5 ppm; IR (film)  $\nu$  2962, 2920, 2851, 1261, 1093, 1020, 864, 800, 425, 418; LRMS (ESI):  $m/z$  255.2  $[\text{M}+\text{Na}]^+$ ; HRMS (ESI):  $m/z$  Exact mass calcd for  $\text{C}_{15}\text{H}_{20}\text{NaO}_2$   $[\text{M}+\text{Na}]^+$ : 255.1356, found: 255.1360; enantiomeric excess was determined by HPLC with a Chiralcel OJ-H column (*n*-hexane/*i*-propanol = 95/5, 0.5 mL/min, 214 nm, 25 °C);  $t_r(R, S) = 8.007$  min,  $t_r(S, R) = 8.173$  min,  $t_r(R, R) = 8.657$  min,  $t_r(S, S) = 9.157$  min; ee (trans) = 74%.

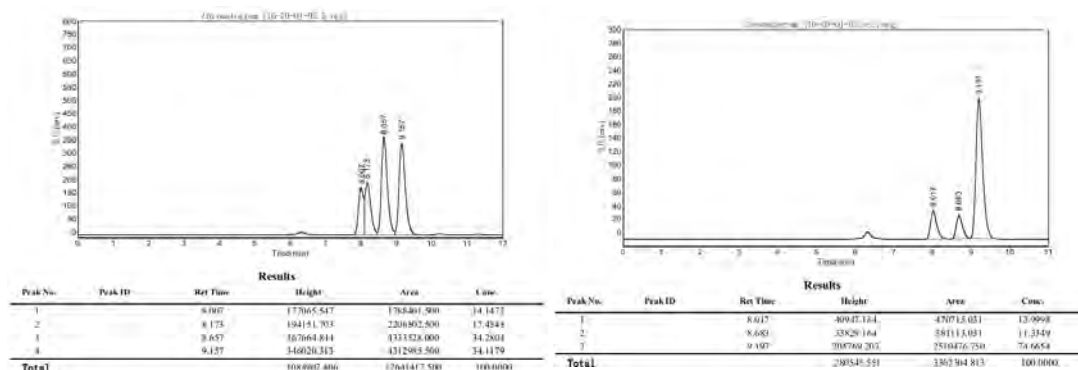

### (1*S*, 2*S*)-Benzyl 2-phenylcyclobutanecarboxylate 3da

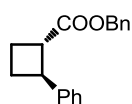

21% yield. Purified by chromatography on silica gel using 15% DCM/petroleum ether as eluent (colorless liquid): TLC  $R_f = 0.35$  (40% DCM/petroleum ether);  $^1\text{H}$  NMR (400 MHz,  $\text{CDCl}_3$ )  $\delta$  7.29-7.27 (m, 2H), 7.24-7.20 (m, 4H), 7.17-7.10 (m, 4H), 5.074-5.067 (m, 2H), 3.78-3.70 (m, 1H), 3.20-3.13 (m, 1H), 2.25-2.18 (m, 2H), 2.13-2.06 (m, 2H) ppm;  $^{13}\text{C}$  NMR (100 MHz,  $\text{CDCl}_3$ )  $\delta$  174.3, 143.6, 136.2, 128.7, 128.5, 128.3, 128.2, 126.6, 126.5, 66.3, 45.6, 43.4, 25.4, 21.8 ppm; IR (film)  $\nu$  3063, 3030, 2962, 1731, 1603, 1497, 1455, 1261, 1242, 1162, 1093, 1028, 801, 752, 697; HRMS (EI):  $m/z$  Exact mass calcd for  $\text{C}_{18}\text{H}_{18}\text{O}_2$   $[\text{M}]^+$ :



266.1307, found: 266.1309; enantiomeric excess was determined by HPLC with a Chiralcel OJ-H column (*n*-hexane/*i*-propanol = 95/5, 0.7 mL/min, 214 nm, 25 °C);  $t_r(R, S) = 18.352$  min,  $t_r(S, R) = 22.085$  min,  $t_r(S, S) = 24.585$  min,  $t_r(R, R) = 29.285$  min, ee (trans) = 9.2%, ee (cis) = 46.7%.

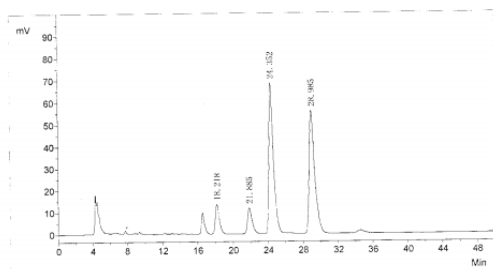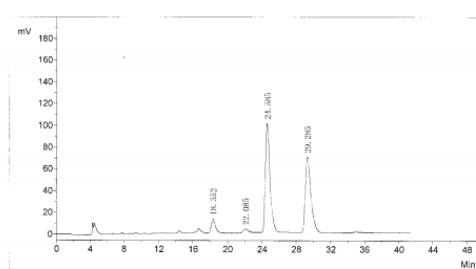

| No.   | PeakNo | ID. Name | R. Time | PeakHeight | PeakArea  | PerCent  |
|-------|--------|----------|---------|------------|-----------|----------|
| 1     | 1      |          | 18.218  | 13357.0    | 426900.3  | 7.4166   |
| 2     | 2      |          | 21.885  | 11747.2    | 427027.5  | 7.4188   |
| 3     | 3      |          | 24.352  | 68268.3    | 2451916.9 | 42.4239  |
| 4     | 4      |          | 28.985  | 55776.1    | 2460150.4 | 42.7407  |
| Total |        |          |         | 149148.5   | 5755995.1 | 100.0000 |

| No.   | PeakNo | ID. Name | R. Time | PeakHeight | PeakArea  | PerCent  |
|-------|--------|----------|---------|------------|-----------|----------|
| 1     | 1      |          | 18.352  | 12597.9    | 405794.3  | 5.4511   |
| 2     | 2      |          | 22.085  | 3799.4     | 147462.7  | 1.9809   |
| 3     | 3      |          | 24.585  | 99928.7    | 3762300.9 | 50.5394  |
| 4     | 4      |          | 29.285  | 69330.2    | 3128735.1 | 42.0286  |
| Total |        |          |         | 185656.3   | 7444293.1 | 100.0000 |

### (1*S*, 2*S*)-Phenyl 2-phenylcyclobutanecarboxylate 3ea

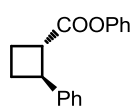

25% yield. Purified by chromatography on silica gel using 15% DCM/petroleum ether as eluent (colorless liquid): TLC  $R_f = 0.35$  (40% DCM/petroleum ether);  $^1\text{H}$  NMR (400 MHz,  $\text{CDCl}_3$ )  $\delta$  7.30-7.19 (m, 5H), 7.11-7.08 (m, 2H), 7.02-6.97 (m, 1H), 6.24-6.22 (m, 2H), 4.10-4.03 (m, 1H), 3.74-3.69 (m, 1H), 2.68-2.58 (m, 1H), 2.47-2.40 (m, 1H), 2.34-2.19 (m, 2H) ppm;  $^{13}\text{C}$  NMR (100 MHz,  $\text{CDCl}_3$ )  $\delta$  172.3, 150.6, 140.9, 129.2, 128.5, 127.8, 126.9, 125.6, 121.6, 45.1, 43.0, 24.4, 20.3 ppm; IR (film)  $\nu$  3061, 3028, 2962, 2850, 1749, 1493, 1456, 1360, 1344, 1261, 1195, 1162, 1131, 1025, 917, 865, 800, 756, 732, 698, 690, 498; HRMS (EI):  $m/z$  Exact mass calcd for  $\text{C}_{17}\text{H}_{16}\text{O}_2$   $[\text{M}]^+$ : 252.1150, found: 252.1149; enantiomeric excess was determined by HPLC with a Chiralcel AD-H column (*n*-hexane/*i*-propanol = 95/5, 0.7 mL/min, 214 nm, 25 °C);  $t_r(S, S) = 7.58$  min,  $t_r(R, R) = 8.20$  min,  $t_r(R, S) = 9.09$  min,  $t_r(S, R) = 10.68$  min, ee (trans) = 74%, ee (cis) = 44%.

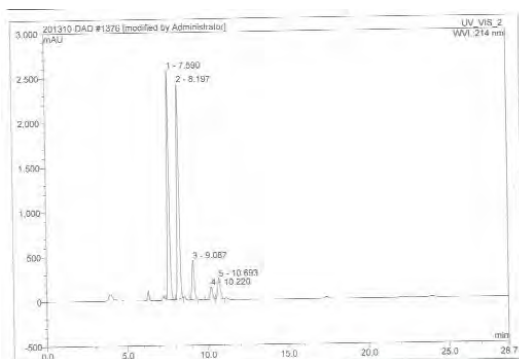

| No.    | Ret.Time | Peak Name | Height   | Area    | Rel.Area | Amount | Type |
|--------|----------|-----------|----------|---------|----------|--------|------|
|        | min      |           | mAU      | mAU*min | %        |        |      |
| 1      | 7.58     | n.a.      | 2560.997 | 358.572 | 41.70    | n.a.   | BMB* |
| 2      | 8.20     | n.a.      | 2403.080 | 357.478 | 41.80    | n.a.   | BMB* |
| 3      | 9.09     | n.a.      | 440.974  | 70.251  | 8.21     | n.a.   | BMB* |
| 4      | 10.22    | n.a.      | 141.480  | 26.120  | 3.05     | n.a.   | BMB* |
| 5      | 10.68    | n.a.      | 235.027  | 44.755  | 5.23     | n.a.   | BMB* |
| Total: |          |           | 5781.567 | 855.176 | 100.00   | 0.000  |      |

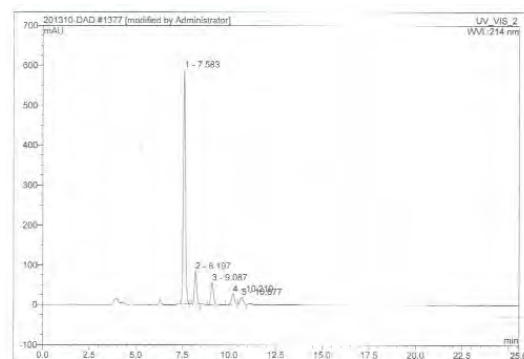

| No.    | Ret.Time | Peak Name | Height  | Area    | Rel.Area | Amount | Type |
|--------|----------|-----------|---------|---------|----------|--------|------|
|        | min      |           | mAU     | mAU*min | %        |        |      |
| 1      | 7.58     | n.a.      | 587.504 | 77.355  | 72.79    | n.a.   | BMB* |
| 2      | 8.20     | n.a.      | 84.202  | 11.762  | 11.07    | n.a.   | BMB* |
| 3      | 9.09     | n.a.      | 56.030  | 8.759   | 8.24     | n.a.   | BMB* |
| 4      | 10.21    | n.a.      | 27.076  | 4.963   | 4.67     | n.a.   | BMB* |
| 5      | 10.68    | n.a.      | 19.171  | 3.434   | 3.23     | n.a.   | BMB* |
| Total: |          |           | 773.984 | 106.273 | 100.00   | 0.000  |      |

### (1*S*, 2*S*)-2,6-Dimethylphenyl 2-phenylcyclobutanecarboxylate **3fa**

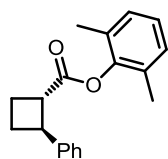

80% yield. Purified by chromatography on silica gel using 15% DCM/petroleum ether as eluent (colorless liquid): TLC  $R_f = 0.35$  (40% DCM/petroleum ether); the trans diastereomer and cis diastereomer can't be separated by chromatography on silica gel.  $^1\text{H}$  NMR (400 MHz,  $\text{CDCl}_3$ )  $\delta$  peaks attributed to the trans diastereomer: 7.27-7.11 (m, 5H), 7.00-6.94 (m, 3H), 3.95-3.88 (m, 1H), 3.47-3.41 (m, 1H), 2.43-2.15 (m, 4H), 2.05 (s, 6H) ppm; peaks attributed to the cis diastereomer: 7.27-7.11 (m, 5H), 6.87-6.81 (m, 3H), 4.08-4.01 (m, 1H), 3.81-3.75 (m, 1H), 2.76-2.15 (m, 4H), 1.57 (s, 6H) ppm;  $^{13}\text{C}$  NMR (100 MHz,  $\text{CDCl}_3$ )  $\delta$  peaks attributed to the trans diastereomer: 172.1, 148.2, 143.5, 130.2, 128.7, 128.60, 127.8, 126.5, 125.9, 45.4, 43.5, 25.8, 22.0, 16.5 ppm; peaks attributed to the cis diastereomer: 171.6, 148.3, 141.1, 130.4, 128.61, 128.5, 126.9, 126.6, 125.6, 44.9, 42.8, 25.0, 21.8, 16.0 ppm; IR (film)  $\nu$  3027, 2963, 2924, 2850, 1748, 1604, 1495, 1476, 1445, 1314, 1261, 1136, 1093, 1019, 943, 866, 800, 699; HRMS (EI):  $m/z$  Exact mass calcd for  $\text{C}_{19}\text{H}_{20}\text{O}_2$  [ $\text{M}$ ] $^+$ : 280.1463, found: 280.1462; enantiomeric excess was determined by HPLC with a Chiralcel IF-3 column (*n*-hexane/*i*-propanol = 98/2, 0.4 mL/min, 214 nm, 25 °C);  $t_r(S, S) = 8.49$  min,  $t_r(R, R) = 8.99$  min,  $t_r(R, S) = 9.31$  min,  $t_r(S, R) = 9.61$  min, ee (trans) = 87%, ee (cis) = 84%.

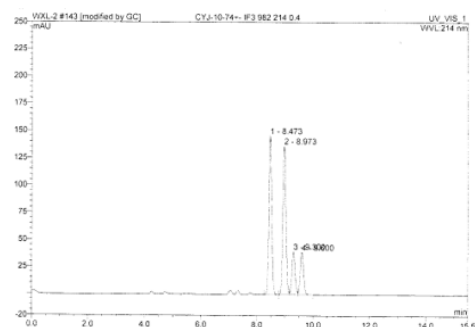

| No.    | Ret.Time min | Peak Name | Height mAU | Area mAU*min | Rel.Area % | Amount | Type |
|--------|--------------|-----------|------------|--------------|------------|--------|------|
| 1      | 8.47         | n.a.      | 146.052    | 17.108       | 38.34      | n.a.   | BMB  |
| 2      | 8.97         | n.a.      | 136.741    | 17.071       | 38.29      | n.a.   | BM   |
| 3      | 9.30         | n.a.      | 40.051     | 5.208        | 11.67      | n.a.   | M    |
| 4      | 9.60         | n.a.      | 39.250     | 5.233        | 11.73      | n.a.   | MB   |
| Total: |              |           | 362.114    | 44.619       | 100.00     | 0.000  |      |

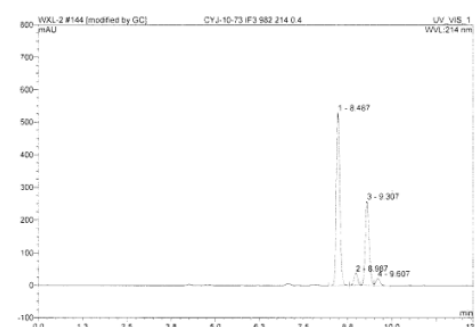

| No.    | Ret.Time min | Peak Name | Height mAU | Area mAU*min | Rel.Area % | Amount | Type |
|--------|--------------|-----------|------------|--------------|------------|--------|------|
| 1      | 8.49         | n.a.      | 529.544    | 60.859       | 60.38      | n.a.   | BMB* |
| 2      | 8.99         | n.a.      | 36.957     | 4.340        | 4.30       | n.a.   | BM*  |
| 3      | 9.31         | n.a.      | 257.272    | 32.715       | 32.44      | n.a.   | BM*  |
| 4      | 9.61         | n.a.      | 21.745     | 2.906        | 2.88       | n.a.   | MB*  |
| Total: |              |           | 845.515    | 100.850      | 100.00     | 0.000  |      |

### (1*S*, 2*S*)-2,6-Diisopropylphenyl 2-phenylcyclobutanecarboxylate **3ga**

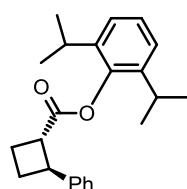

99% yield. Purified by chromatography on silica gel using 15% DCM/petroleum ether as eluent (colorless liquid): TLC  $R_f = 0.35$  (40% DCM/petroleum ether); the trans diastereomer and cis diastereomer can't be separated by chromatography on silica gel.  $^1\text{H}$  NMR (400 MHz,  $\text{CDCl}_3$ )  $\delta$  peaks attributed to the trans diastereomer: 7.27-6.93 (m, 8H), 3.93-3.87 (m, 1H), 3.48-3.42 (m, 1H), 2.42-2.16 (m, 6H), 1.15-0.78 (m, 12H) ppm; peaks attributed to the cis diastereomer: 7.27-6.93 (m, 8H), 4.08-4.01 (m, 1H), 3.84-3.78 (m, 1H), 2.86-2.70 (m, 6H),

1.15-0.78 (m, 12H) ppm;  $^{13}\text{C}$  NMR (100 MHz,  $\text{CDCl}_3$ )  $\delta$  peaks attributed to the trans diastereomer: 172.9, 143.4, 140.4, 128.6, 127.6, 126.55, 126.54, 124.0, 123.9, 45.5, 43.8, 27.6, 25.9, 25.0, 22.8, 21.9 ppm; peaks attributed to the cis diastereomer: 172.4, 141.6, 141.0, 128.5, 126.9, 126.7, 126.3, 124.1, 123.8, 45.0, 42.9, 31.7, 27.0, 24.5, 23.7, 22.0 ppm; IR (film)  $\nu$  3028, 2964, 2869, 1750, 1459, 1443, 1363, 1237, 1164, 1138, 1096, 793, 698; LRMS (ESI):  $m/z$  359.2  $[\text{M}+\text{Na}]^+$ ; HRMS (ESI):  $m/z$  Exact mass calcd for  $\text{C}_{23}\text{H}_{29}\text{O}_2$   $[\text{M}+\text{H}]^+$ : 337.2162, found: 337.2161; enantiomeric excess was determined through corresponding acid by HPLC with a Chiralcel PC-2 column (*n*-hexane/*i*-propanol/TFA = 90/10/0.1, 1.0 mL/min, 214 nm, 25 °C);  $t_r$  (major) = 4.625 min,  $t_r$  (minor) = 5.260 min, ee (trans) = 89% ee.

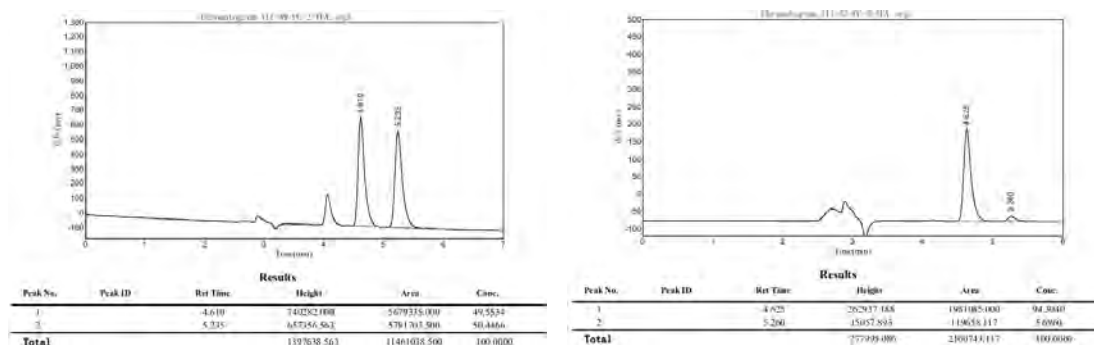

### (1*S*, 2*S*)-[1,1':3',1''-Terphenyl]-2'-yl 2-phenylcyclobutanecarboxylate **3a**

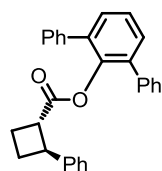

99% yield. Purified by chromatography on silica gel using 15% DCM/petroleum ether as eluent (colorless liquid): TLC  $R_f$  = 0.35 (40% DCM/petroleum ether);  $[\alpha]_D^{20}$  +61.0 (*c* 0.33,  $\text{CHCl}_3$ );  $^1\text{H}$  NMR (400 MHz,  $\text{CDCl}_3$ )  $\delta$  7.42-7.31 (m, 13H), 7.22-7.13 (m, 3H), 6.84-6.82 (m, 2H), 3.52-3.45 (m, 1H), 2.99-2.92 (m, 1H), 2.14-2.07 (m, 1H), 1.97-1.81 (m, 2H), 1.75-1.63 (m, 1H) ppm;  $^{13}\text{C}$  NMR (100 MHz,  $\text{CDCl}_3$ )  $\delta$  172.1, 145.2, 143.6, 137.9, 136.1, 130.2, 129.3, 128.30, 128.28, 127.5, 126.5, 126.14, 126.13, 44.6, 41.7, 25.1, 21.9 ppm; IR (film)  $\nu$  3058, 3028, 2987, 2948, 2869, 1752, 1597, 1576, 1496, 1463, 1443, 1421, 1372, 1338, 1315, 1239, 1185, 1134, 1073, 1030, 803, 756, 700, 612, 584, 516; HRMS (EI):  $m/z$  Exact mass calcd for  $\text{C}_{29}\text{H}_{24}\text{O}_2$   $[\text{M}]^+$ : 404.1776, found: 404.1780; Enantiomeric excess was determined by HPLC with a Chiralcel AD-H column (*n*-hexane/*i*-propanol = 90/10, 0.5 mL/min, 254 nm, 25 °C);  $t_r$  (*S*, *S*) = 9.052 min,  $t_r$  (*R*, *R*) = 10.238 min, ee (trans) = 92%.

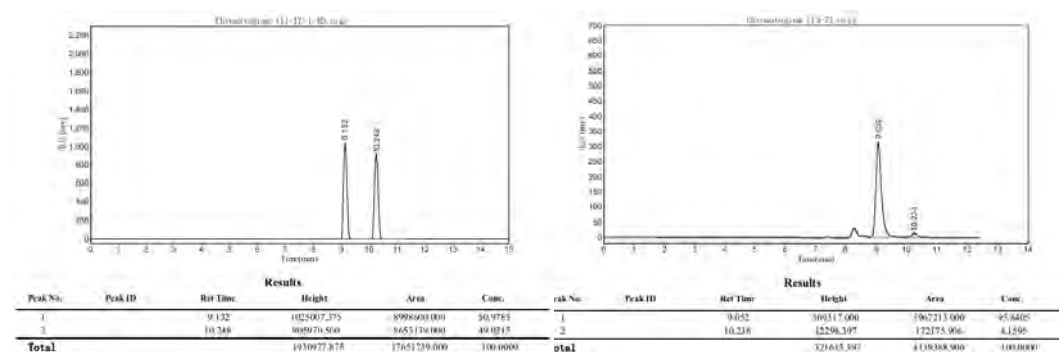

**(1*S*, 2*S*)-[1,1':3',1''-Terphenyl]-2'-yl 2-(4-methoxyphenyl)cyclobutanecarboxylate 3hb**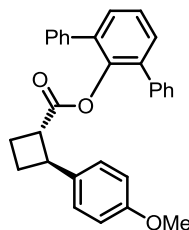

90% yield. Purified by chromatography on silica gel using 15% DCM/petroleum ether as eluent (colorless liquid): TLC  $R_f = 0.35$  (40% DCM/petroleum ether);  $[\alpha]_D^{20} +65.4$  ( $c$  0.98,  $\text{CHCl}_3$ );  $^1\text{H NMR}$  (400 MHz,  $\text{CDCl}_3$ )  $\delta$  7.42-7.31 (m, 13H), 6.77-6.72 (m, 4H), 3.77 (s, 3H), 3.44-3.37 (m, 1H), 2.92-2.86 (m, 1H), 2.09-2.01 (m, 1H), 1.92-1.79 (m, 2H), 1.73-1.62 (m, 1H) ppm;  $^{13}\text{C NMR}$  (100 MHz,  $\text{CDCl}_3$ )  $\delta$  172.1, 158.0, 145.1, 137.9, 136.1, 135.8, 130.1, 129.2, 128.3, 127.5, 127.2, 126.4, 113.7, 55.4, 45.0, 41.2, 25.3, 21.7 ppm; IR (film)  $\nu$  3057, 3031, 2989, 2950, 2870, 2834, 1751, 1612, 1582, 1514, 1463, 1442, 1421, 1372, 1304, 1247, 1177, 1132, 1073, 1035, 1009, 918, 830, 803, 757, 701, 612, 583, 543, 531, 515; LRMS (ESI):  $m/z$  457.2  $[\text{M}+\text{Na}]^+$ ; HRMS (ESI):  $m/z$  Exact mass calcd for  $\text{C}_{30}\text{H}_{26}\text{NaO}_3$   $[\text{M}+\text{Na}]^+$ : 457.1774, found: 457.1770; enantiomeric excess was determined by HPLC with a Chiralcel AD-H column ( $n$ -hexane/*i*-propanol = 90/10, 0.5 mL/min, 254 nm, 25 °C);  $t_r$  (*S*, *S*) = 10.780 min,  $t_r$  (*R*, *R*) = 12.430 min, ee (trans) = 89%.

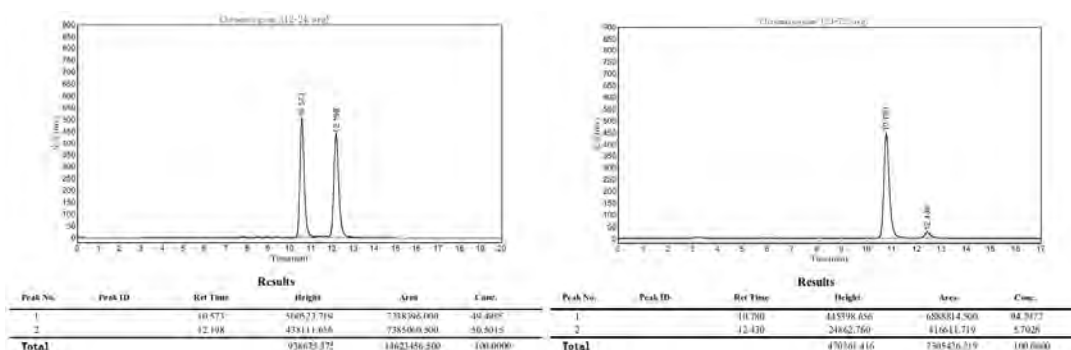**(1*S*, 2*S*)-[1,1':3',1''-Terphenyl]-2'-yl 2-(4-(tert-butyl)phenyl)cyclobutanecarboxylate 3hc**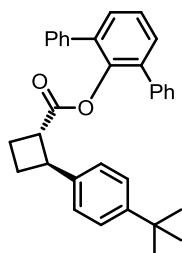

97% yield. Purified by chromatography on silica gel using 15% DCM/petroleum ether as eluent (colorless liquid): TLC  $R_f = 0.35$  (40% DCM/petroleum ether);  $[\alpha]_D^{20} +55.9$  ( $c$  1.02,  $\text{CHCl}_3$ );  $^1\text{H NMR}$  (400 MHz,  $\text{CDCl}_3$ )  $\delta$  7.41-7.39 (m, 4H), 7.37-7.34 (m, 3H), 7.33-7.29 (m, 6H), 7.22 (d,  $J = 8.0$  Hz, 2H), 6.79 (d,  $J = 8.0$  Hz, 2H), 3.49-3.42 (m, 1H), 2.97-2.91 (m, 1H), 2.10-2.03 (m, 1H), 1.96-1.79 (m, 2H), 1.71-1.61 (m, 1H), 1.31 (s, 9H) ppm;  $^{13}\text{C NMR}$  (100 MHz,  $\text{CDCl}_3$ )  $\delta$  172.1, 148.9, 145.2, 140.5, 137.9, 136.1, 130.1, 129.2, 128.3, 127.5, 126.4, 125.9, 125.1, 44.8, 41.4, 34.5, 31.6, 25.2, 21.9 ppm; IR (film)  $\nu$  3057, 3030, 2962, 2904, 2867, 1753, 1597, 1500, 1463, 1420, 1363, 1268, 1239, 1185, 1134, 1073, 1021, 919, 831, 802, 756, 701, 613, 584, 567, 515; HRMS (EI):  $m/z$  Exact mass calcd for  $\text{C}_{33}\text{H}_{32}\text{O}_2$   $[\text{M}]^+$ : 460.2402, found: 460.2398;

enantiomeric excess was determined by HPLC with a Chiralcel AD-H column (*n*-hexane/*i*-propanol = 90/10, 0.5 mL/min, 254 nm, 25 °C);  $t_r(S, S) = 7.383$  min,  $t_r(R, R) = 8.087$  min, ee (trans) = 93%.

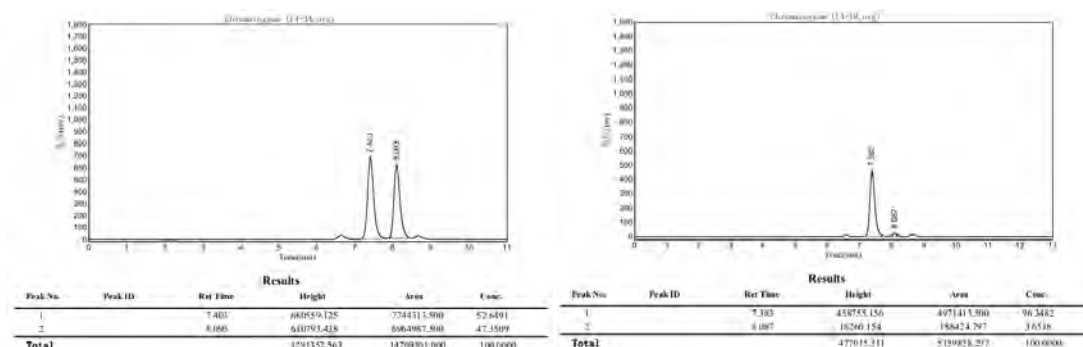

**(1*S*, 2*S*)-[1,1':3',1''-Terphenyl]-2'-yl 2-(4-(trifluoromethyl)phenyl)cyclobutanecarboxylate**  
**3hd**

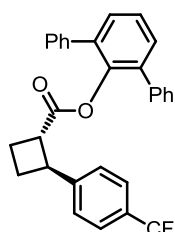

73% yield. Purified by chromatography on silica gel using 15% DCM/petroleum ether as eluent (colorless liquid): TLC  $R_f = 0.35$  (40% DCM/petroleum ether);  $[\alpha]_D^{20} +57.1$  (*c* 1.01,  $\text{CHCl}_3$ );  $^1\text{H NMR}$  (400 MHz,  $\text{CDCl}_3$ )  $\delta$  7.44-7.38 (m, 9H), 7.35-7.30 (m, 6H), 6.88 (d,  $J = 12.0$  Hz, 2H), 3.54-3.47 (m, 1H), 2.97-2.91 (m, 1H), 2.16-2.08 (m, 1H), 1.98-1.84 (m, 2H), 1.77-1.67 (m, 1H) ppm;  $^{13}\text{C NMR}$  (100 MHz,  $\text{CDCl}_3$ )  $\delta$  171.7, 147.5, 145.1, 137.9, 136.1, 130.2, 129.3, 128.3, 127.9 (q,  $J = 74.3$  Hz), 127.6, 126.6, 126.5, 125.2 (q,  $J = 3.8$  Hz), 124.4 (q,  $J = 270.1$  Hz), 44.6, 41.4, 24.9, 21.9 ppm;  $^{19}\text{F NMR}$  (376 MHz,  $\text{CDCl}_3$ )  $\delta$  -62.4 ppm; IR (film)  $\nu$  3853, 3649, 3058, 3032, 2951, 2871, 1752, 1618, 1597, 1499, 1464, 1443, 1421, 1326, 1240, 1164, 1125, 1068, 1018, 920, 838, 802, 757, 701, 612, 602, 584, 515; LRMS (ESI):  $m/z$  473.1  $[\text{M}+\text{H}]^+$ ; HRMS (ESI):  $m/z$  Exact mass calcd for  $\text{C}_{30}\text{H}_{24}\text{O}_2\text{F}_3$   $[\text{M}+\text{H}]^+$ : 473.1723, found: 473.1714; enantiomeric excess was determined by HPLC with a Chiralcel AD-H column (*n*-hexane/*i*-propanol = 90/10, 0.5 mL/min, 254 nm, 25 °C);  $t_r(S, S) = 8.212$  min,  $t_r(R, R) = 10.045$  min, ee (trans) = 98%.

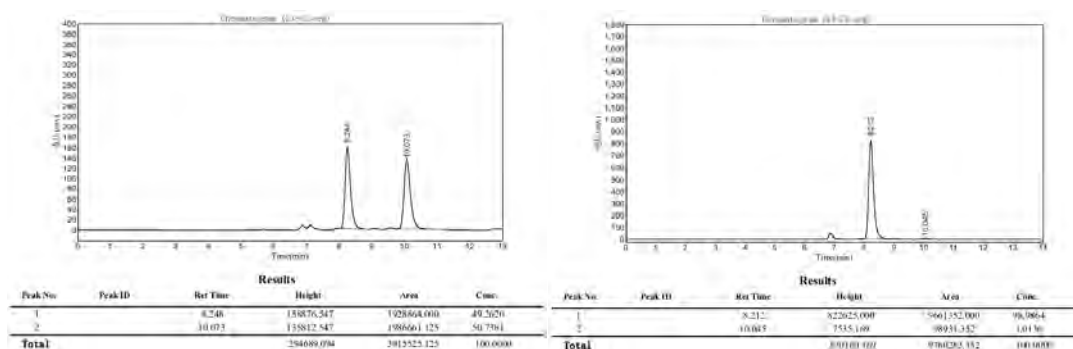

### Methyl 4-((1*S*, 2*S*)-2-((**[1,1':3',1''-terphenyl]-2'-yloxy**)carbonyl)cyclobutyl)benzoate **3he**

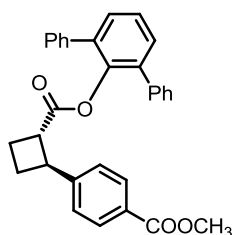

36% yield. Purified by chromatography on silica gel using 25% DCM/petroleum ether as eluent (colorless liquid): TLC  $R_f = 0.35$  (5% acetone/petroleum ether);  $[\alpha]_D^{20} +74.1$  ( $c$  0.24,  $\text{CHCl}_3$ );  $^1\text{H NMR}$  (400 MHz,  $\text{CDCl}_3$ )  $\delta$  7.86 (d,  $J = 8.2$  Hz, 2H), 7.42-7.33 (m, 13H), 6.85 (d,  $J = 8.1$  Hz, 2H), 3.92 (s, 3H), 3.54-3.47 (m, 1H), 2.99-2.92 (m, 1H), 2.17-2.09 (m, 1H), 1.98-1.84 (m, 2H), 1.77-1.67 (m, 1H);  $^{13}\text{C NMR}$  (100 MHz,  $\text{CDCl}_3$ )  $\delta$  171.8, 167.2, 148.9, 145.1, 137.9, 136.1, 130.2, 129.7, 129.2, 128.3, 128.0, 127.6, 126.5, 126.1, 52.2, 44.4, 41.6, 25.0, 21.9 ppm; IR (film)  $\nu$  3853, 3675, 3057, 2950, 1752, 1720, 1609, 1492, 1435, 1420, 1279, 1184, 1136, 1110, 1019, 758, 701, 584; HRMS (EI):  $m/z$  Exact mass calcd for  $\text{C}_{31}\text{H}_{26}\text{O}_4$   $[\text{M}]^+$ : 462.1831, found: 462.1835; enantiomeric excess was determined by HPLC with a Chiralcel AD-H column ( $n$ -hexane/*i*-propanol = 90/10, 0.5 mL/min, 254 nm, 25 °C);  $t_r$  (*S*, *S*) = 14.155 min,  $t_r$  (*R*, *R*) = 18.037 min, ee (trans) = 92%.

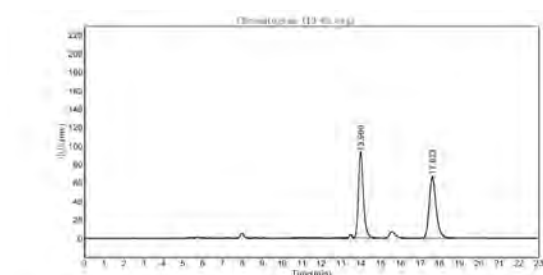

| Peak No.     | Peak ID | Ret Time | Height     | Area        | Conc.    |
|--------------|---------|----------|------------|-------------|----------|
| 1            |         | 13.998   | 97660.823  | 1164287.250 | 48.9199  |
| 2            |         | 17.453   | 66073.953  | 1648101.500 | 50.0801  |
| <b>Total</b> |         |          | 153734.781 | 3290928.750 | 100.0000 |

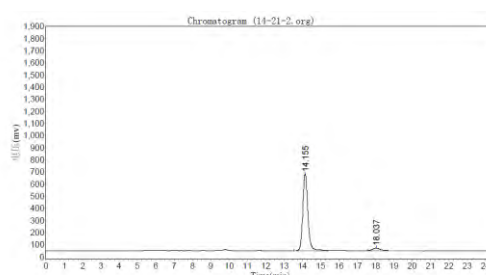

| Peak No.     | Peak ID | Ret Time | Height     | Area         | Conc.    |
|--------------|---------|----------|------------|--------------|----------|
| 1            |         | 14.155   | 629328.875 | 11806465.000 | 96.0349  |
| 2            |         | 18.037   | 20074.307  | 487471.406   | 3.9651   |
| <b>Total</b> |         |          | 649403.182 | 12293939.406 | 100.0000 |

### (1*S*, 2*S*)-[1,1':3',1''-Terphenyl]-2'-yl 2-(4-fluorophenyl)cyclobutanecarboxylate **3hf**

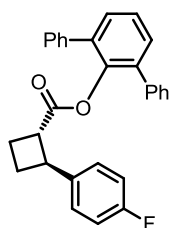

78% yield. Purified by chromatography on silica gel using 15% DCM/petroleum ether as eluent (colorless liquid): TLC  $R_f = 0.35$  (40% DCM/petroleum ether);  $[\alpha]_D^{20} +67.5$  ( $c$  1.02,  $\text{CHCl}_3$ );  $^1\text{H NMR}$  (400 MHz,  $\text{CDCl}_3$ )  $\delta$  7.41-7.31 (m, 13H), 6.88-6.83 (m, 2H), 6.76-6.72 (m, 2H), 3.46-3.39 (m, 1H), 2.92-2.85 (m, 1H), 2.11-2.03 (m, 1H), 1.93-1.80 (m, 2H), 1.74-1.63 (m, 1H) ppm;  $^{13}\text{C NMR}$  (100 MHz,  $\text{CDCl}_3$ )  $\delta$  171.9, 161.4 (d,  $J = 242.7$  Hz), 145.1, 139.2 (d,  $J = 3.1$  Hz), 137.9, 136.1, 130.2, 129.2, 128.3, 127.6 (d,  $J = 7.9$  Hz), 127.5, 126.5, 115.0 (d,  $J = 21.1$  Hz), 44.9, 41.0, 25.2, 21.8 ppm;  $^{19}\text{F NMR}$  (376 MHz,  $\text{CDCl}_3$ )  $\delta$  -117.2 ppm; IR (film)  $\nu$  3057, 3033, 2988, 2949, 2871, 1752, 1604, 1509, 1463, 1443, 1421, 1373, 1317, 1224, 1185, 1157, 1135, 1073, 1017, 833, 803, 757, 701, 613, 584, 530; LRMS (ESI):  $m/z$  445.0  $[\text{M}+\text{Na}]^+$ ; HRMS (ESI):  $m/z$  Exact mass calcd for  $\text{C}_{29}\text{H}_{23}\text{FNaO}_2$   $[\text{M}+\text{Na}]^+$ : 445.1574, found: 445.1586; enantiomeric excess was determined by

HPLC with a Chiralcel AD-H column (*n*-hexane/*i*-propanol = 90/10, 0.5 mL/min, 254 nm, 25 °C);  $t_r(S, S) = 8.855$  min,  $t_r(R, R) = 10.615$  min, ee (trans) = 97%.

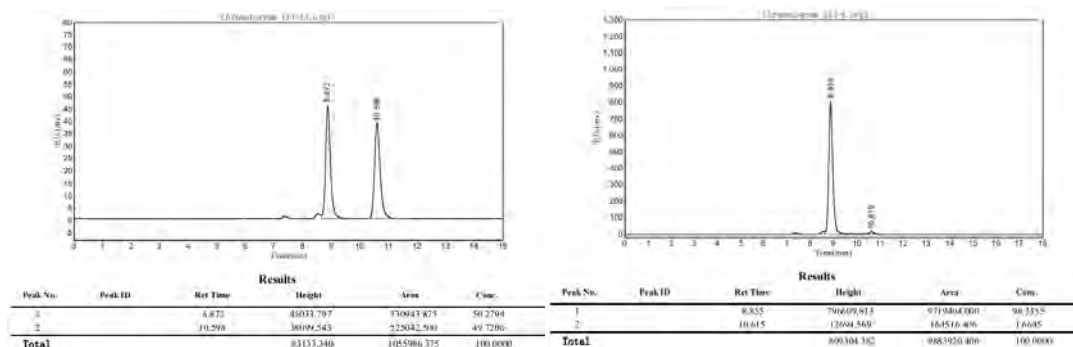

**(1*S*, 2*S*)-[1,1':3',1''-Terphenyl]-2'-yl 2-(4-chlorophenyl)cyclobutanecarboxylate 3hg**

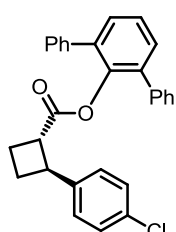

96% yield. Purified by chromatography on silica gel using 15% DCM/petroleum ether as eluent (colorless liquid): TLC  $R_f = 0.35$  (40% DCM/petroleum ether);  $[\alpha]_D^{20} +70.5$  (*c* 1.01,  $\text{CHCl}_3$ );  $^1\text{H NMR}$  (400 MHz,  $\text{CDCl}_3$ )  $\delta$  7.41-7.32 (m, 13H), 7.14 (d,  $J = 8.4$  Hz, 2H), 6.70 (d,  $J = 8.4$  Hz, 2H), 3.45-3.38 (m, 1H), 2.92-2.85 (m, 1H), 2.11-2.03 (m, 1H), 1.92-1.80 (m, 2H), 1.74-1.64 (m, 1H) ppm;  $^{13}\text{C NMR}$  (100 MHz,  $\text{CDCl}_3$ )  $\delta$  171.8, 145.1, 142.0, 137.9, 136.1, 131.8, 130.2, 129.2, 128.32, 128.27, 127.6, 127.5, 126.5, 44.7, 41.1, 25.0, 21.8 ppm; IR (film)  $\nu$  3058, 3030, 2988, 2949, 1751, 1597, 1492, 1463, 1421, 1372, 1317, 1239, 1185, 1135, 1091, 1073, 1014, 826, 802, 757, 701, 612, 584, 510; HRMS (EI):  $m/z$  Exact mass calcd for  $\text{C}_{29}\text{H}_{23}\text{O}_2\text{Cl}$   $[\text{M}]^+$ : 438.1387, found: 438.1385; enantiomeric excess was determined by HPLC with a Chiralcel AD-H column (*n*-hexane/*i*-propanol = 90/10, 0.5 mL/min, 254 nm, 25 °C);  $t_r(S, S) = 8.978$  min,  $t_r(R, R)$

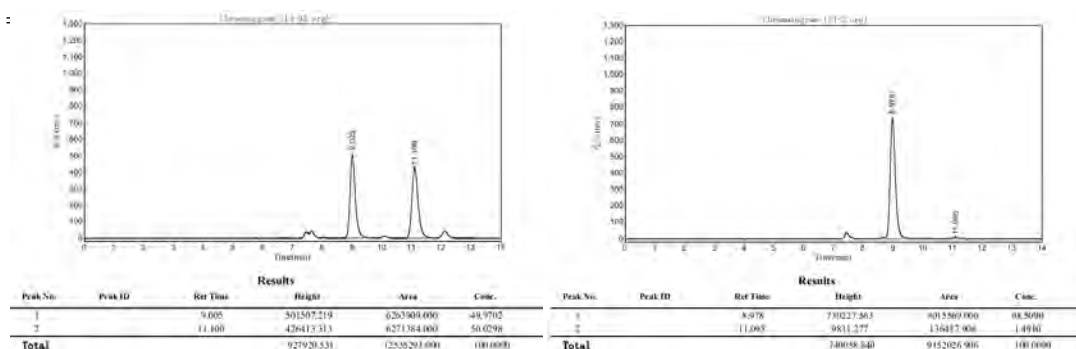

**(1*S*, 2*S*)-[1,1':3',1''-Terphenyl]-2'-yl 2-(4-bromophenyl)cyclobutanecarboxylate 3hh**

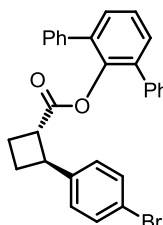

92% yield. Purified by chromatography on silica gel using 15% DCM/petroleum ether as eluent (colorless liquid): TLC  $R_f = 0.35$  (40% DCM/petroleum ether);

$[\alpha]_D^{20} +62.5$  ( $c$  1.00,  $\text{CHCl}_3$ ); m.p. 102-105 °C;  $^1\text{H}$  NMR (400 MHz,  $\text{CDCl}_3$ )  $\delta$  7.41-7.28 (m, 15H), 6.65 (d,  $J = 8.4$  Hz, 2H), 3.43-3.37 (m, 1H), 2.928-2.85 (m, 1H), 2.12-2.05 (m, 1H), 1.92-1.81 (m, 2H), 1.75-1.64 (m, 1H) ppm;  $^{13}\text{C}$  NMR (100 MHz,  $\text{CDCl}_3$ )  $\delta$  171.8, 145.1, 142.5, 137.9, 136.1, 131.3, 130.2, 129.2, 128.3, 127.9, 127.6, 126.5, 119.9, 44.7, 41.1, 25.0, 21.8 ppm; IR (film)  $\nu$  3057, 3030, 2987, 2947, 1752, 1596, 1489, 1463, 1442, 1421, 1396, 1371, 1315, 1239, 1185, 1135, 1072, 1010, 820, 802, 758, 737, 710, 612, 584, 516; LRMS (ESI):  $m/z$  505.0  $[\text{M}+\text{Na}]^+$ ; HRMS (ESI):  $m/z$  Exact mass calcd for  $\text{C}_{29}\text{H}_{23}\text{BrNaO}_2$   $[\text{M}+\text{Na}]^+$ : 505.0774, found: 505.0785; enantiomeric excess was determined by HPLC with a Chiralcel AD-H column ( $n$ -hexane/ $i$ -propanol = 90/10, 0.5 mL/min, 254 nm, 25 °C);  $t_r(S, S) = 9.270$  min,  $t_r(R, R) = 11.603$  min, ee (trans) = 96%.

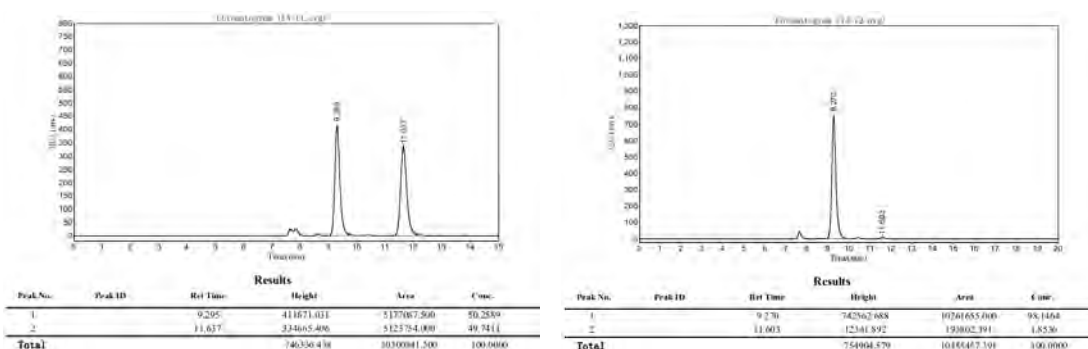

### (1*S*, 2*S*)-[1,1':3',1''-Terphenyl]-2'-yl 2-(3-methoxyphenyl)cyclobutanecarboxylate **3hi**

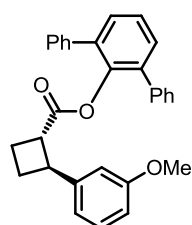

91% yield. Purified by chromatography on silica gel using 15% DCM/petroleum ether as eluent (colorless liquid): TLC  $R_f = 0.35$  (40% DCM/petroleum ether);  $[\alpha]_D^{20} +64.4$  ( $c$  0.69,  $\text{CHCl}_3$ );  $^1\text{H}$  NMR (400 MHz,  $\text{CDCl}_3$ )  $\delta$  7.42-7.29 (m, 13H), 7.12 (t,  $J = 8.0$  Hz, 1H), 6.71 (dd,  $J = 2.4, 8.0$  Hz, 1H), 6.53 (s, 1H), 6.43 (d,  $J = 7.6$  Hz, 1H), 3.74 (s, 3H), 3.46-3.39 (m, 1H), 2.99-2.93 (m, 1H), 2.12-2.03 (m, 1H), 1.96-1.81 (m, 2H), 1.74-1.63 (m, 1H) ppm;  $^{13}\text{C}$  NMR (100 MHz,  $\text{CDCl}_3$ )  $\delta$  172.0, 159.6, 145.2, 145.1, 137.9, 136.1, 130.1, 129.3, 129.2, 128.3, 127.5, 126.5, 118.6, 112.0, 111.5, 55.3, 44.6, 41.9, 25.3, 21.7 ppm; IR (film)  $\nu$  3056, 3030, 2949, 2869, 2834, 1752, 1601, 1582, 1490, 1463, 1421, 1370, 1317, 1289, 1260, 1239, 1183, 1158, 1134, 1073, 1045, 916, 861, 803, 756, 700, 612, 583, 516; HRMS (EI):  $m/z$  Exact mass calcd for  $\text{C}_{30}\text{H}_{26}\text{O}_3$   $[\text{M}]^+$ : 434.1882, found: 434.1887; enantiomeric excess was determined by HPLC with a Chiralcel AD-H column ( $n$ -hexane/ $i$ -propanol = 90/10, 0.5 mL/min, 254 nm, 25 °C);  $t_r(S, S) = 11.220$  min,  $t_r(R, R) = 12.727$  min, ee (trans) = 93%.



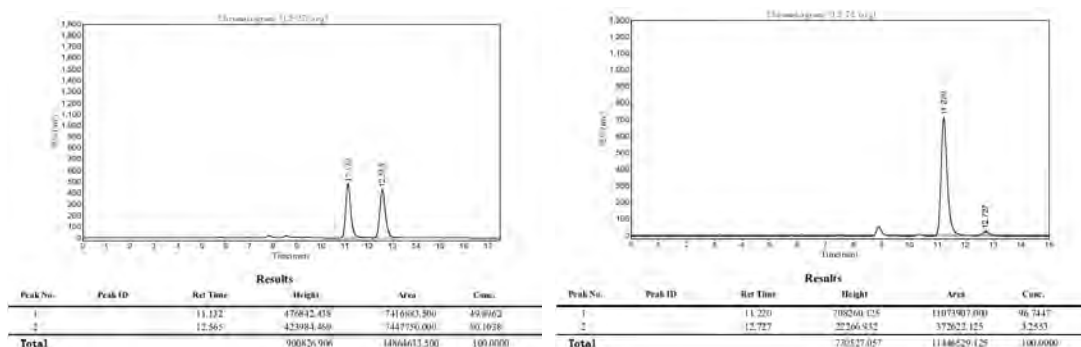

### (1*S*, 2*S*)-[1,1':3',1''-Terphenyl]-2'-yl 2-(3-fluorophenyl)cyclobutanecarboxylate **3hj**

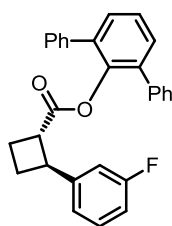

84% yield. Purified by chromatography on silica gel using 15% DCM/petroleum ether as eluent (colorless liquid): TLC  $R_f = 0.35$  (40% DCM/petroleum ether);  $[\alpha]_D^{20} +68.3$  ( $c$  0.37,  $\text{CHCl}_3$ );  $^1\text{H NMR}$  (400 MHz,  $\text{CDCl}_3$ )  $\delta$  7.42-7.29 (m, 13H), 7.18-7.12 (m, 1H), 6.87-6.82 (m, 1H), 6.60-6.55 (m, 2H), 3.48-3.41 (m, 1H), 2.96-2.89 (m, 1H), 2.13-2.05 (m, 1H), 1.95-1.82 (m, 2H), 1.75-1.64 (m, 1H) ppm;  $^{13}\text{C NMR}$  (100 MHz,  $\text{CDCl}_3$ )  $\delta$  171.8, 162.9 (d,  $J = 244.3$  Hz), 146.2 (d,  $J = 7.3$  Hz), 145.1, 137.9, 136.1, 130.2, 129.7 (d,  $J = 8.2$  Hz), 129.2, 128.3, 127.6, 126.5, 121.8 (d,  $J = 2.8$  Hz), 113.2 (d,  $J = 21.1$  Hz), 113.0 (d,  $J = 21.0$  Hz), 44.6, 41.4, 25.1, 21.8 ppm;  $^{19}\text{F NMR}$  (376 MHz,  $\text{CDCl}_3$ )  $\delta$  -113.5 ppm; IR (film)  $\nu$  3058, 3032, 2950, 2870, 1752, 1614, 1588, 1490, 1463, 1442, 1421, 1371, 1316, 1272, 1240, 1207, 1184, 1136, 1073, 1027, 967, 866, 843, 802, 786, 757, 701, 612, 584; LRMS (ESI):  $m/z$  423.2  $[\text{M}+\text{H}]^+$ ; HRMS (ESI):  $m/z$  Exact mass calcd for  $\text{C}_{29}\text{H}_{24}\text{O}_2\text{F}$   $[\text{M}+\text{H}]^+$ : 423.1755, found: 423.1751; enantiomeric excess was determined by HPLC with a Chiralcel AD-H column ( $n$ -hexane/*i*-propanol = 90/10, 0.5 mL/min, 254 nm, 25 °C);  $t_r$  (*S*, *S*) = 8.833 min,  $t_r$  (*R*, *R*) = 10.505 min, ee (trans) = 97%.

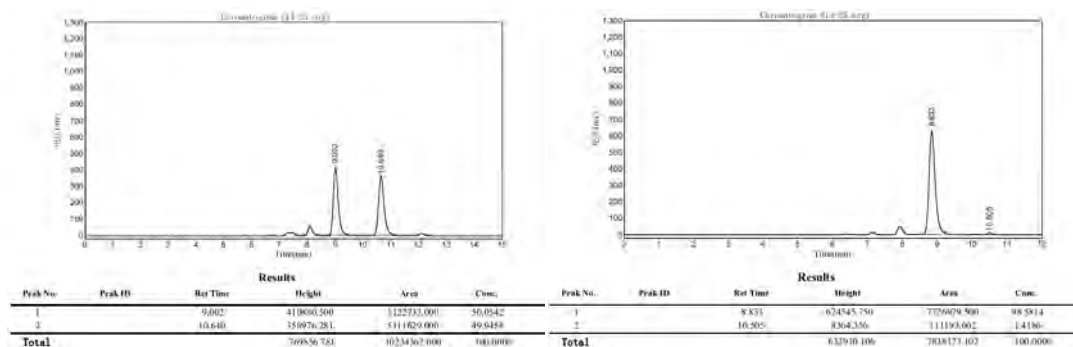

### Methyl 3-((1*S*,2*S*)-2-((1,1':3',1''-terphenyl)-2'-yloxy)carbonyl)cyclobutyl)benzoate 3hk

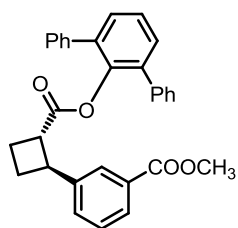

95% yield. Purified by chromatography on silica gel using 25% DCM/petroleum ether as eluent (colorless liquid): TLC  $R_f = 0.35$  (5% acetone/petroleum ether);  $[\alpha]_D^{20} +55.2$  ( $c$  1.02,  $\text{CHCl}_3$ );  $^1\text{H NMR}$  (400 MHz,  $\text{CDCl}_3$ )  $\delta$  7.85 (d,  $J = 7.6$  Hz, 1H), 7.74 (s, 1H), 7.40-7.36 (m, 7H), 7.30-7.22 (m, 7H), 6.94 (d,  $J = 7.6$  Hz, 1H), 3.90 (s, 3H), 3.48-3.41 (m, 1H), 3.00-2.94 (m, 1H), 2.15-2.09 (m, 1H), 1.98-1.83 (m, 2H), 1.79-1.70 (m, 1H) ppm;  $^{13}\text{C NMR}$  (100 MHz,  $\text{CDCl}_3$ )  $\delta$  171.7, 167.2, 145.0, 143.8, 137.8, 136.0, 131.1, 130.11, 130.09, 129.2, 128.4, 128.2, 127.5, 127.2, 126.5, 52.2, 44.5, 41.7, 25.3, 21.6 ppm; IR (film)  $\nu$  3058, 3031, 2990, 2950, 1752, 1721, 1587, 1498, 1458, 1443, 1421, 1290, 1240, 1207, 1185, 1136, 1110, 1089, 1027, 914, 803, 755, 701, 612, 584, 514; HRMS (EI):  $m/z$  Exact mass calcd for  $\text{C}_{31}\text{H}_{26}\text{O}_4$   $[\text{M}]^+$ : 462.1831, found: 462.1832; enantiomeric excess was determined by HPLC with a Chiralcel AD-H column ( $n$ -hexane/*i*-propanol = 90/10, 0.5 mL/min, 254 nm, 25 °C);  $t_r$  (*S*, *S*) = 14.747 min,  $t_r$  (*R*, *R*) = 16.357 min, ee (trans) = 96%.

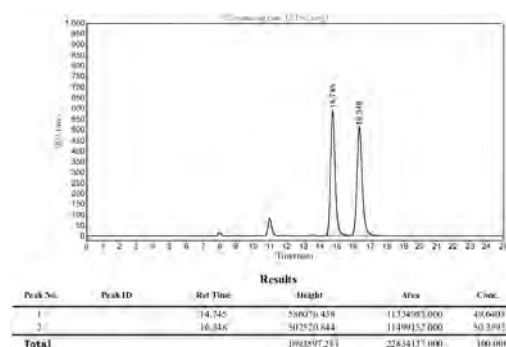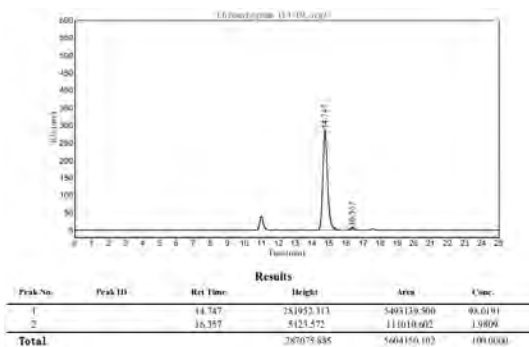

### (1*S*, 2*S*)-[1,1':3',1''-Terphenyl]-2'-yl 2-(2-methoxyphenyl)cyclobutanecarboxylate 3hl

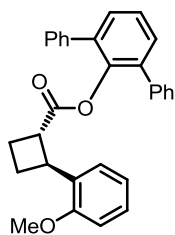

51% yield. Purified by chromatography on silica gel using 15% DCM/petroleum ether as eluent (colorless liquid): TLC  $R_f = 0.35$  (40% DCM/petroleum ether);  $[\alpha]_D^{20} +99.3$  ( $c$  0.76,  $\text{CHCl}_3$ );  $^1\text{H NMR}$  (400 MHz,  $\text{CDCl}_3$ )  $\delta$  7.42-7.36 (m, 7H), 7.29-7.28 (m, 6H), 7.18-7.14 (m, 1H), 6.84-6.74 (m, 3H), 3.65-3.58 (m, 4H), 3.17-3.10 (m, 1H), 2.18-2.11 (m, 1H), 1.84-1.71 (m, 2H), 1.68-1.61 (m, 1H) ppm;  $^{13}\text{C NMR}$  (100 MHz,  $\text{CDCl}_3$ )  $\delta$  171.9, 157.4, 145.2, 137.9, 136.1, 131.5, 130.1, 129.3, 128.2, 127.4, 127.3, 126.8, 126.4, 120.3, 110.1, 55.1, 42.4, 38.4, 26.1, 22.3 ppm; IR (film)  $\nu$  3058, 3030, 2990, 2950, 1754, 1600, 1586, 1493, 1463, 1437, 1420, 1375, 1243, 1185, 1131, 1029, 801, 754, 735, 701, 612, 583; HRMS (EI):  $m/z$  Exact mass calcd for  $\text{C}_{30}\text{H}_{26}\text{O}_3$   $[\text{M}]^+$ : 434.1882, found: 434.1879; enantiomeric excess was determined by HPLC with a Chiralcel IF-3 column

(*n*-hexane/*i*-propanol = 98/2, 0.7 mL/min, 214 nm, 25 °C);  $t_r(S, S) = 14.550$  min,  $t_r(R, R) = 15.520$  min, ee (trans) = 96%.

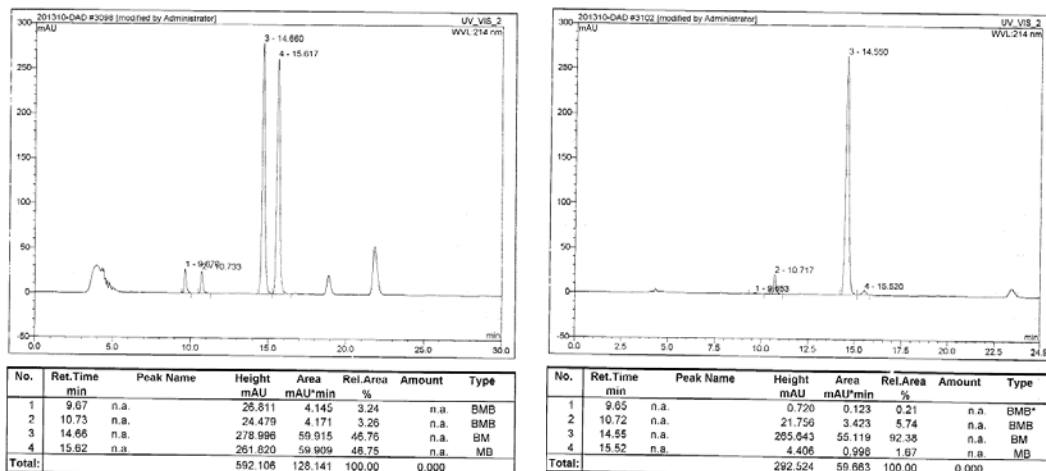

### (1*S*, 2*S*)-[1,1':3',1''-Terphenyl]-2'-yl 2-(naphthalen-1-yl)cyclobutanecarboxylate 3hm

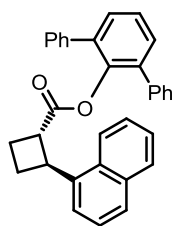

96% yield. Purified by chromatography on silica gel using 15% DCM/petroleum ether as eluent (colorless liquid): TLC  $R_f = 0.35$  (40% DCM/petroleum ether);  $[\alpha]_D^{20} +97.3$  ( $c$  1.01,  $\text{CHCl}_3$ );  $^1\text{H NMR}$  (400 MHz,  $\text{CDCl}_3$ )  $\delta$  7.84-7.82 (m, 1H), 7.76-7.74 (m, 1H), 7.69 (d,  $J = 8.4$  Hz, 1H), 7.46-7.34 (m, 10H), 7.29-7.20 (m, 6H), 6.99 (d,  $J = 6.8$  Hz, 1H), 4.05-3.98 (m, 1H), 3.41-3.40 (m, 1H), 2.44-2.35 (m, 1H), 1.93-1.78 (m, 3H) ppm;  $^{13}\text{C NMR}$  (100 MHz,  $\text{CDCl}_3$ )  $\delta$  171.9, 145.1, 139.0, 137.8, 136.1, 133.8, 131.3, 130.1, 129.2, 128.7, 128.2, 127.4, 126.9, 126.5, 125.8, 125.7, 125.5, 124.1, 122.6, 41.9, 40.2, 27.7, 22.1 ppm; IR (film)  $\nu$  3055, 2948, 2868, 1752, 1597, 1576, 1508, 1499, 1463, 1420, 1368, 1306, 1265, 1240, 1184, 1133, 1073, 798, 778, 756, 737, 701, 612, 584, 514, 448; LRMS (ESI):  $m/z$  477.1  $[\text{M}+\text{Na}]^+$ ; HRMS (EI):  $m/z$  Exact mass calcd for  $\text{C}_{33}\text{H}_{26}\text{O}_2$   $[\text{M}]^+$ : 454.1927, found: 454.1922; enantiomeric excess was determined by HPLC with a Chiralcel AD-H column (*n*-hexane/*i*-propanol = 90/10, 0.5 mL/min, 254 nm, 25 °C);  $t_r(S, S) = 9.838$  min,  $t_r(R, R) = 12.168$  min, ee (trans) = 83%.

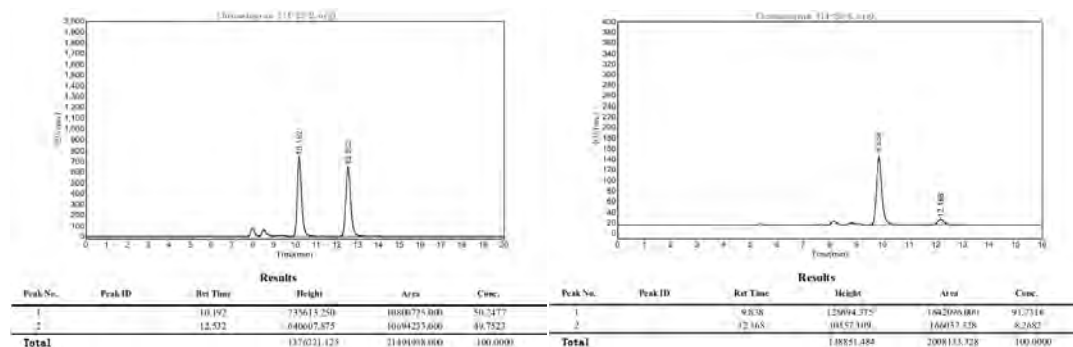

**(1*S*, 2*S*)-[1,1':3',1''-Terphenyl]-2'-yl 2-(naphthalen-2-yl)cyclobutanecarboxylate 3hn**

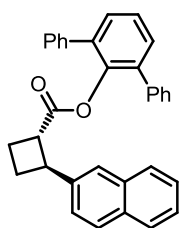

68% yield. Purified by chromatography on silica gel using 15% DCM/petroleum ether as eluent (colorless liquid): TLC  $R_f = 0.35$  (40% DCM/petroleum ether);  $[\alpha]_D^{20} +61.6$  ( $c$  0.98,  $\text{CHCl}_3$ );  $^1\text{H NMR}$  (400 MHz,  $\text{CDCl}_3$ )  $\delta$  7.78 (d,  $J = 8.0$  Hz, 1H), 7.71-7.65 (m, 2H), 7.42-7.25 (m, 16H), 7.04 (d,  $J = 8.0$  Hz, 1H), 3.65-3.59 (m, 1H), 3.09-3.02 (m, 1H), 2.20-2.13 (m, 1H), 2.06-1.96 (m, 1H), 1.92-1.85 (m, 1H), 1.80-1.70 (m, 1H) ppm;  $^{13}\text{C NMR}$  (100 MHz,  $\text{CDCl}_3$ )  $\delta$  172.1, 145.1, 141.0, 137.9, 136.1, 133.4, 132.2, 130.1, 129.2, 128.3, 128.0, 127.8, 127.7, 127.5, 126.5, 126.0, 125.4, 125.0, 124.3, 44.6, 42.0, 25.2, 21.8 ppm; IR (film)  $\nu$  3055, 2948, 2869, 1751, 1632, 1600, 1499, 1463, 1442, 1420, 1363, 1309, 1266, 1239, 1184, 1133, 1986, 1073, 1018, 856, 818, 802, 756, 701, 612, 477; LRMS (ESI):  $m/z$  472.3  $[\text{M}+\text{NH}_4]^+$ ; HRMS (ESI):  $m/z$  Exact mass calcd for  $\text{C}_{33}\text{H}_{30}\text{O}_2\text{N}$   $[\text{M}+\text{NH}_4]^+$ : 472.2271, found: 472.2262; enantiomeric excess was determined by HPLC with a Chiralcel AD-H column (*n*-hexane/*i*-propanol = 90/10, 0.5 mL/min, 254 nm, 25 °C);  $t_r$  (*S, S*) = 10.227 min,  $t_r$  (*R, R*) = 12.372 min, ee (trans) = 87%;

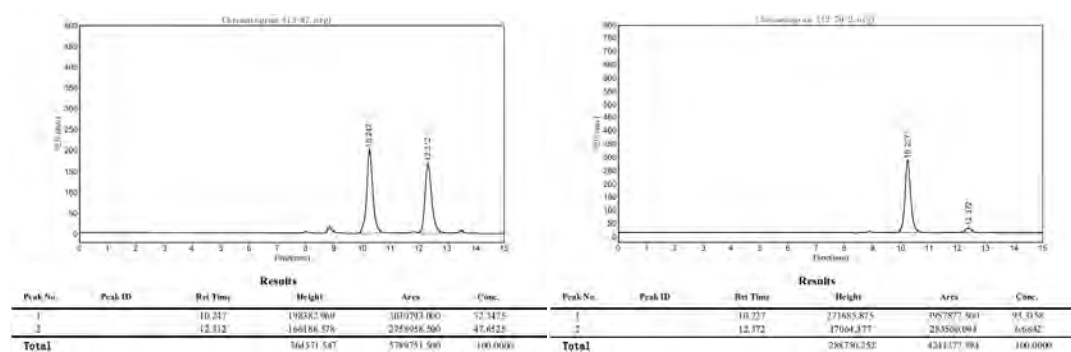

**5. Reduction of compound 3ha**

**((1*S*, 2*S*)-2-Phenylcyclobutyl)methanol 5**

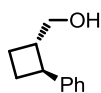

To a suspension of lithium aluminum hydride (30 mg, 0.8 mmol) in THF (2 mL), a solution of (1*S*, 2*S*)-[1,1':3',1''-terphenyl]-2'-yl 2-phenylcyclobutanecarboxylate (80.8 mg, 0.2 mmol, 92% ee) in THF (2 mL) was added dropwise at 25 °C. The mixture was reacted at 25 °C for 4 h and quenched with water. The aqueous layer was extracted with EtOAc three times, and the combined organic layer was dried and concentrated to provide the crude product. Flash chromatography on silica gel using 10% DCM/ petroleum ether as eluent gave the product as colorless oil 31.4 mg, 97% yield. TLC  $R_f = 0.35$  (40% DCM/petroleum ether).  $[\alpha]_D^{20} +52.7$  ( $c$  0.56,  $\text{CHCl}_3$ );  $^1\text{H NMR}$  (400 MHz,  $\text{CDCl}_3$ )  $\delta$  7.25-7.18 (m, 4H), 7.13-7.10 (m, 1H), 3.78-3.65 (m, 2H), 3.24-3.17 (m, 1H), 2.62-2.51 (m, 1H), 2.24-2.17 (m, 1H), 2.05-1.90 (m, 2H), 1.76-1.67 (m, 1H) ppm;  $^{13}\text{C NMR}$  (100 MHz,  $\text{CDCl}_3$ )  $\delta$  144.9, 128.5, 126.8, 126.2, 66.5, 45.6,

43.1, 26.0, 21.2 ppm; IR (film)  $\nu$  3336, 3026, 2970, 2938, 2865, 1063, 1495, 1448, 1260, 1086, 1021, 747, 698; HRMS (EI):  $m/z$  Exact mass calcd for  $C_{11}H_{14}O$   $[M]^+$ : 162.1045, found: 162.1044; enantiomeric excess was determined by HPLC with a Chiralcel PC-2 column (*n*-hexane/*i*-propanol = 90/10, 0.7 mL/min, 214 nm, 25 °C);  $t_r(R, R) = 8.005$  min,  $t_r(S, S) = 12.182$  min, 92% ee.

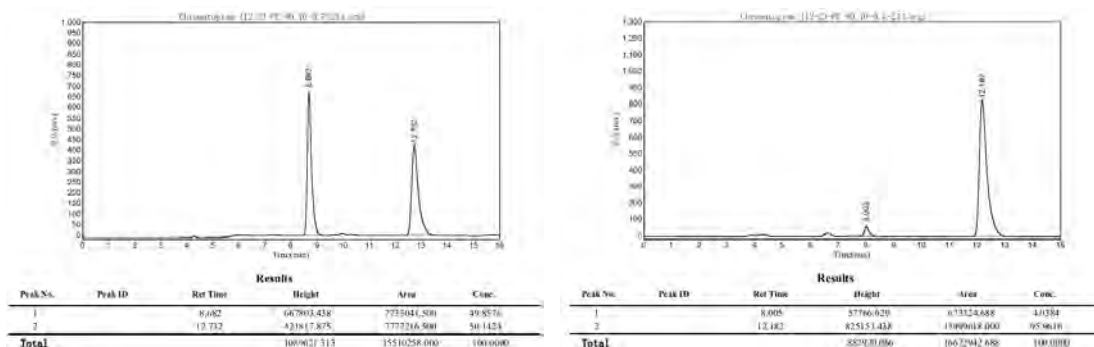

## 6. Hydrolysis of compound 3ha

### (1*S*, 2*S*)-2-Phenylcyclobutanecarboxylic acid 6

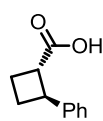

The adduct (1*S*, 2*S*)-[1,1':3',1''-terphenyl]-2'-yl 2-phenylcyclobutanecarboxylate (120 mg, 0.3 mmol, 92% ee) and potassium hydroxide (73 mg, 1.3 mmol) was dissolved in toluene (5 mL), and then the solution was heated to reflux for 2 h. After the mixture was cooled to 25 °C, water (10 mL) was added, and the mixture was extracted with ethyl acetate (2 × 10 mL). The aqueous phase was acidified with 1.0 M aqueous HCl to pH = 1. The acidified aqueous layer was extracted with ethyl acetate (3 × 10 mL), and the combined organic phase was washed with water and brine and dried over anhydrous  $Na_2SO_4$ . The solvent was evaporated and the residue was purified by flash column chromatography on silica gel, eluting with 20/1 DCM/MeOH, TLC  $R_f = 0.30$  (5% DCM/MeOH); gave the product (1*S*, 2*S*)-2-phenylcyclobutanecarboxylic acid 42 mg (colorless liquid, 89% yield).  $[\alpha]_D^{20} +38.7$  ( $c$  1.83,  $CHCl_3$ );  $^1H$  NMR (400 MHz,  $CDCl_3$ )  $\delta$  9.48 (br s, 1H), 7.18-7.03 (m, 5H), 3.70-3.63 (m, 1H), 3.11-3.04 (m, 1H), 2.21-2.10 (m, 2H), 2.07-1.95 (m, 2H) ppm;  $^{13}C$  NMR (100 MHz,  $CDCl_3$ )  $\delta$  179.5, 143.4, 128.5, 126.6, 126.5, 45.1, 43.2, 25.4, 21.7 ppm; IR (film)  $\nu$  2947, 1694, 1495, 1421, 1260, 948, 743, 699, 552; HRMS (EI):  $m/z$  Exact mass calcd for  $C_{11}H_{12}O_2$   $[M]^+$ : 176.0837, found: 176.0833; enantiomeric excess was determined by HPLC with a Chiralcel PC-2 column (*n*-hexane/*i*-propanol/TFA = 90/10/0.1, 1.0 mL/min, 214 nm, 25 °C);  $t_r(R, R) = 4.693$  min,  $t_r(S, S) = 5.342$  min, 92% ee.

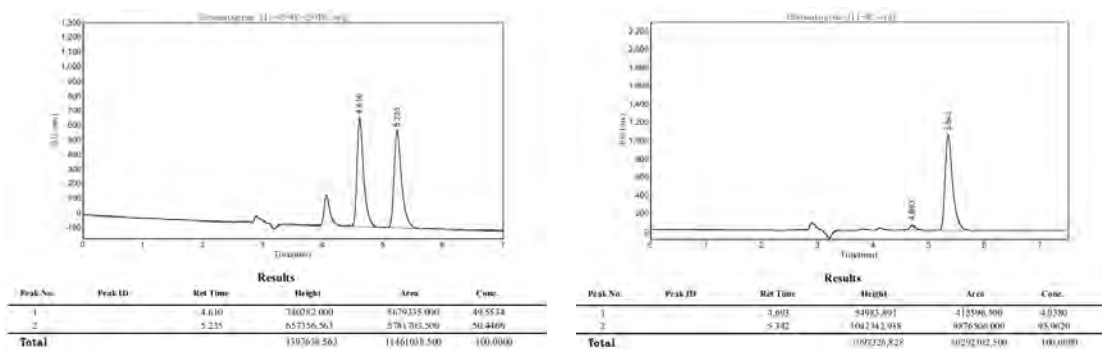

## 7. Allylation of compound 3ha

### (1*S*, 2*R*)-[1,1':3',1''-Terphenyl]-2'-yl 1-allyl-2-phenylcyclobutanecarboxylate 7

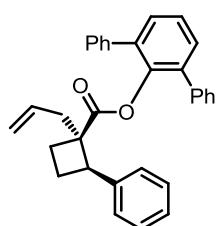

Under argon atmosphere, freshly distilled  $i\text{Pr}_2\text{NH}$  (84  $\mu\text{L}$ , 0.598 mmol) was dissolved in 1 mL THF in a schlenk tube at  $-72^\circ\text{C}$ ,  $n\text{-BuLi}$  (2.5 M in hexane, 0.24 mL, 0.598 mmol) was added dropwise and the mixture was reacted for 20 min at  $-72^\circ\text{C}$ . The solution of (1*S*, 2*S*)-[1,1':3',1''-terphenyl]-2'-yl 2-phenylcyclobutanecarboxylate (186 mg, 0.46 mmol) in 1 mL THF was added to the freshly prepared LDA-THF solution dropwise and then stirred for 1 h at  $-72^\circ\text{C}$ . Then allyl iodide (63  $\mu\text{L}$ , 0.69 mmol) was added to the mixture dropwise and was stirred for 1 h at  $-72^\circ\text{C}$ , then removed the dry ice-ethanol bath. When the mixture was heated to  $25^\circ\text{C}$ , the mixture was stirred for additional 1 h to accomplish the reaction. The solvent was evaporated and the residue was purified by flash column chromatography on silica gel (eluting with 10% DCM/petroleum ether, TLC  $R_f = 0.30$  (25% DCM/ petroleum ether)) to get the product [1,1':3',1''-terphenyl]-2'-yl 1-allyl-2-phenylcyclobutanecarboxylate (white solid, 202 mg, 99% yield).  $[\alpha]_D^{20} -0.5$  ( $c$  0.70,  $\text{CHCl}_3$ ); m.p.  $83\text{-}85^\circ\text{C}$ ;  $^1\text{H NMR}$  (400 MHz,  $\text{CDCl}_3$ )  $\delta$  7.36-7.26 (m, 13H), 7.00-6.98 (m, 3H), 6.55-6.53 (m, 2H), 5.31-5.21 (m, 1H), 4.95 (d,  $J = 13.6$  Hz, 2H), 3.34 (t,  $J = 9.2$  Hz, 1H), 2.17-2.00 (m, 3H), 1.92-1.72 (m, 3H) ppm;  $^{13}\text{C NMR}$  (100 MHz,  $\text{CDCl}_3$ )  $\delta$  171.6, 145.0, 140.7, 138.2, 136.3, 134.2, 130.2, 129.7, 128.3, 127.8, 127.51, 127.47, 126.1, 125.8, 118.1, 54.4, 47.2, 42.5, 26.8, 21.9 ppm; IR(KBr): 3065, 3029, 2949, 1756, 1495, 1456, 1420, 1179, 1107, 1019, 918, 755, 700, 509; HRMS (EI):  $m/z$  Exact mass calcd for  $\text{C}_{32}\text{H}_{28}\text{O}_2$   $[\text{M}]^+$ : 444.2089, found: 444.2082. enantiomeric excess was determined by HPLC with a Chiralcel PC-4 column ( $n\text{-hexane}/i\text{-propanol} = 98/2$ , 0.4 mL/min, 214 nm,  $25^\circ\text{C}$ );  $t_r(S, R) = 12.671$  min,  $t_r(R, S) = 14.904$  min, 91% ee. The absolute configuration was determined by  $^1\text{H NMR}$  NOESY.

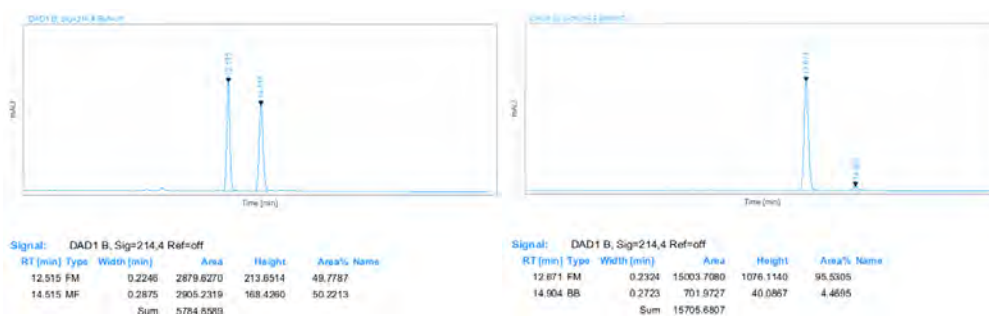

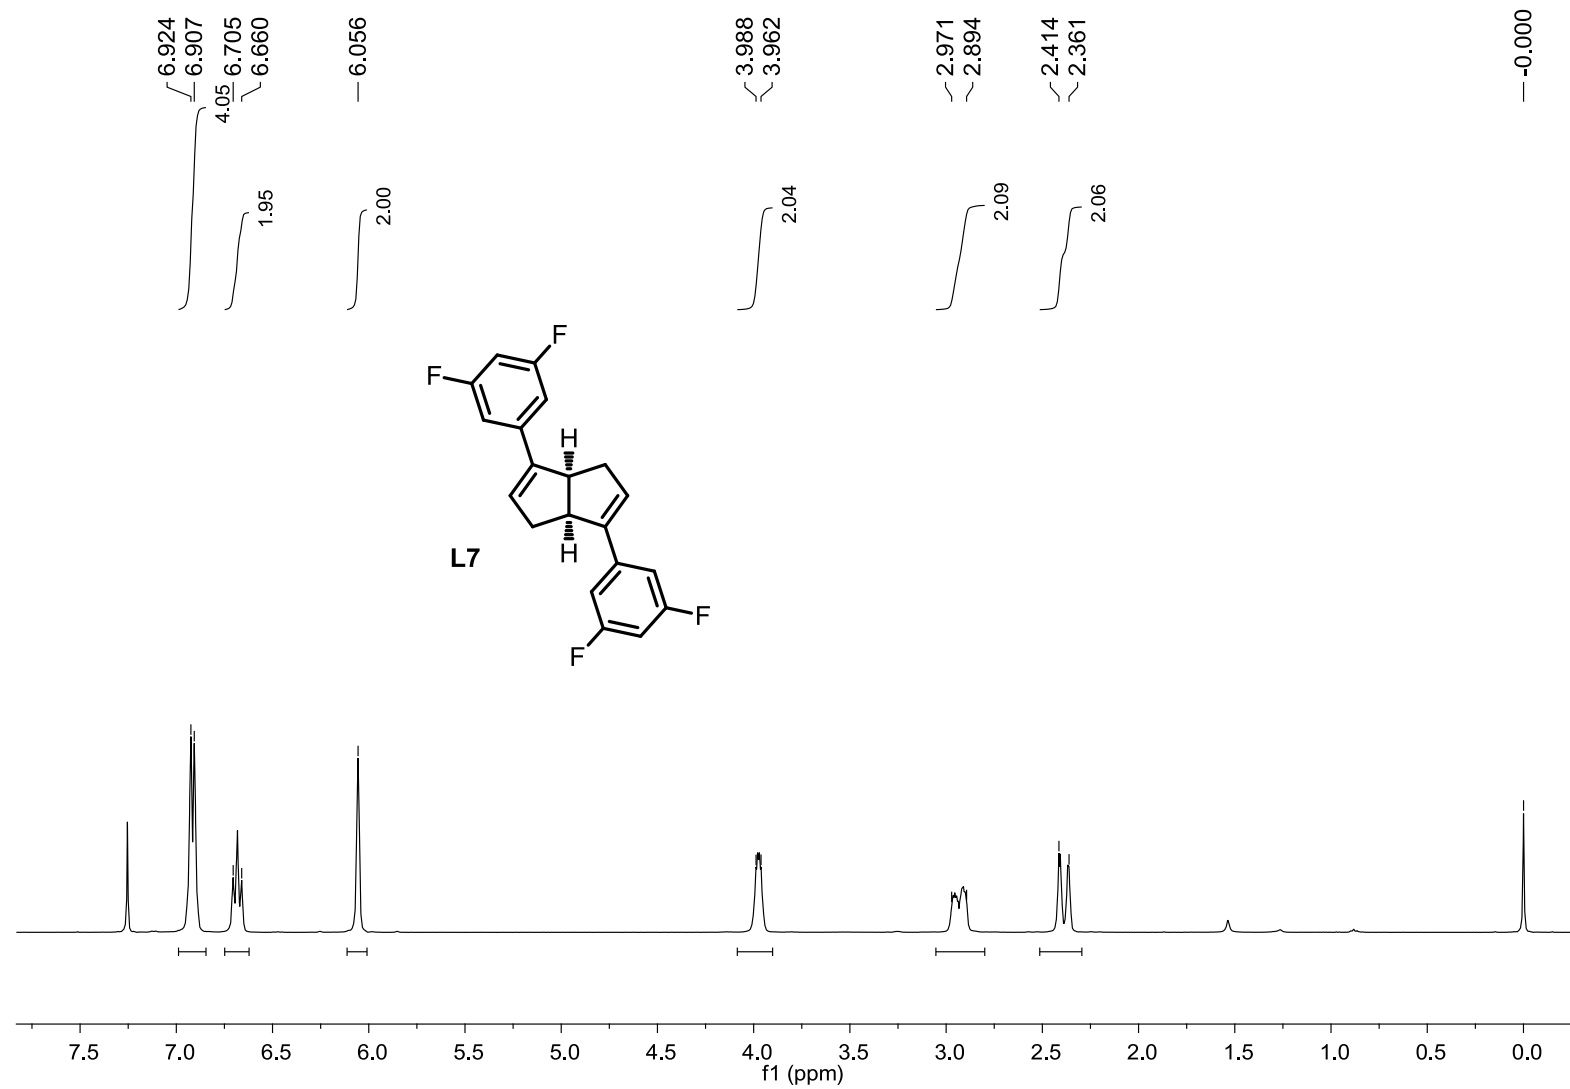

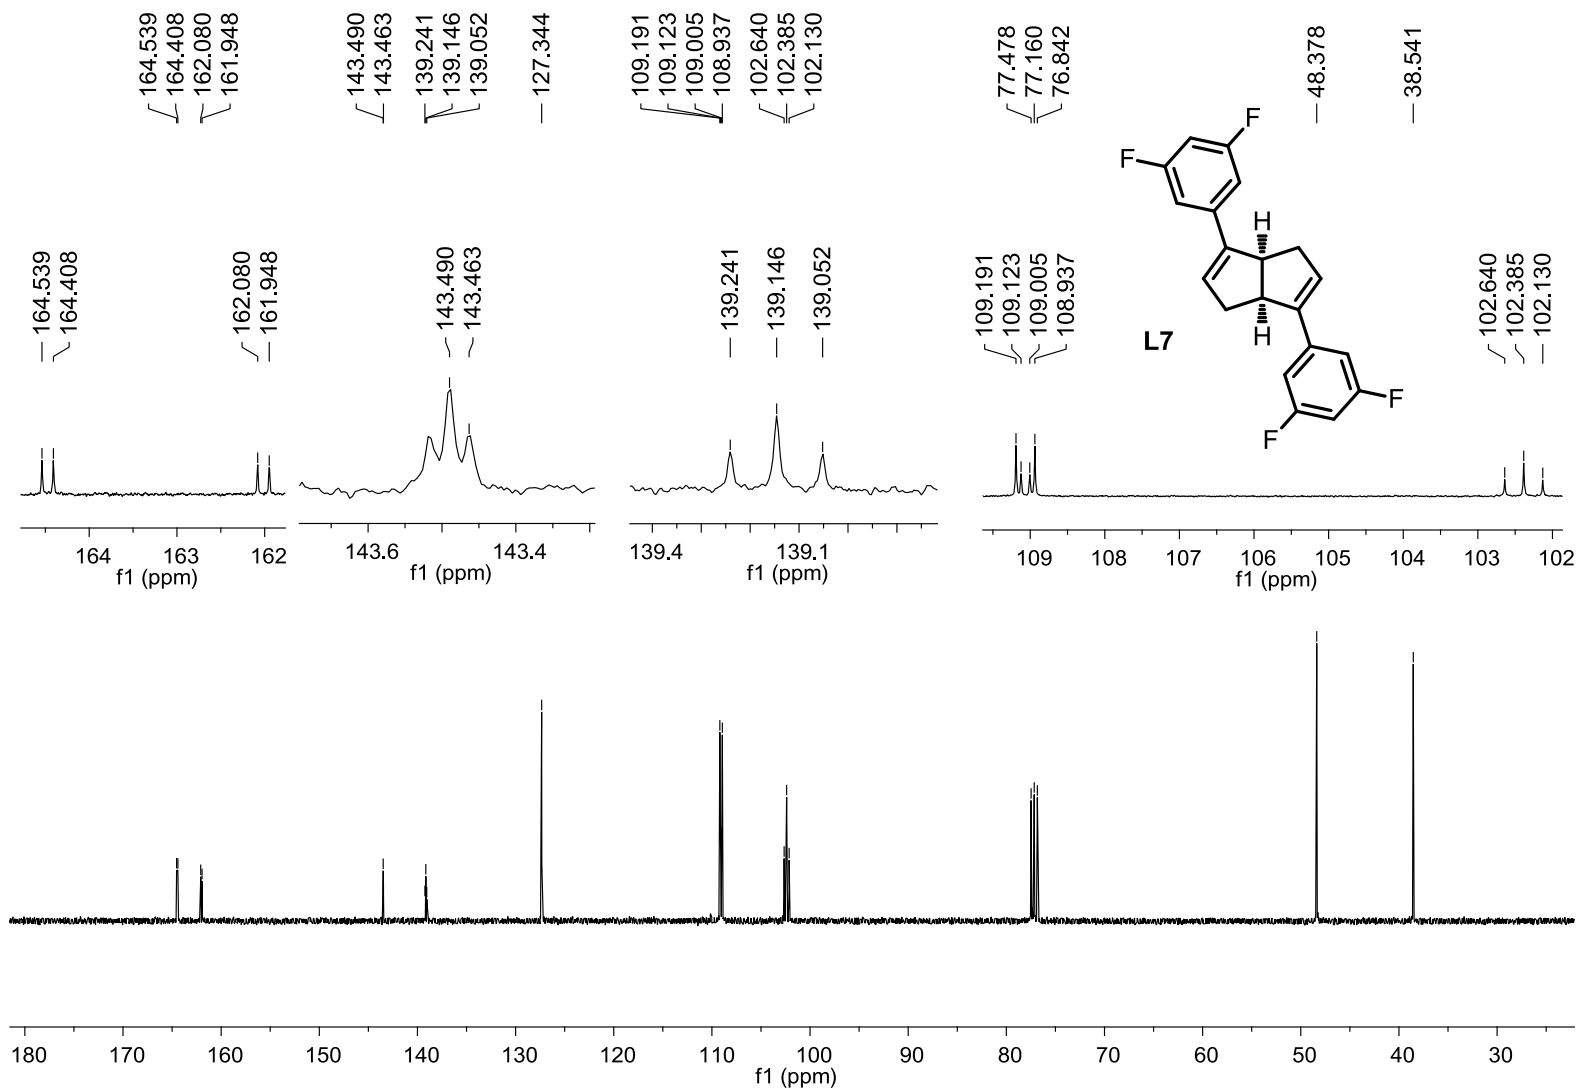



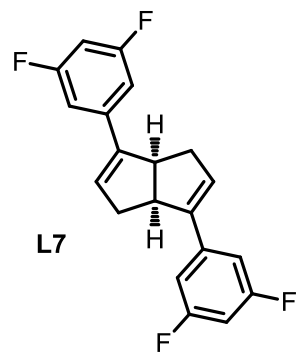

~ -110.326  
| -110.348  
~ -110.369

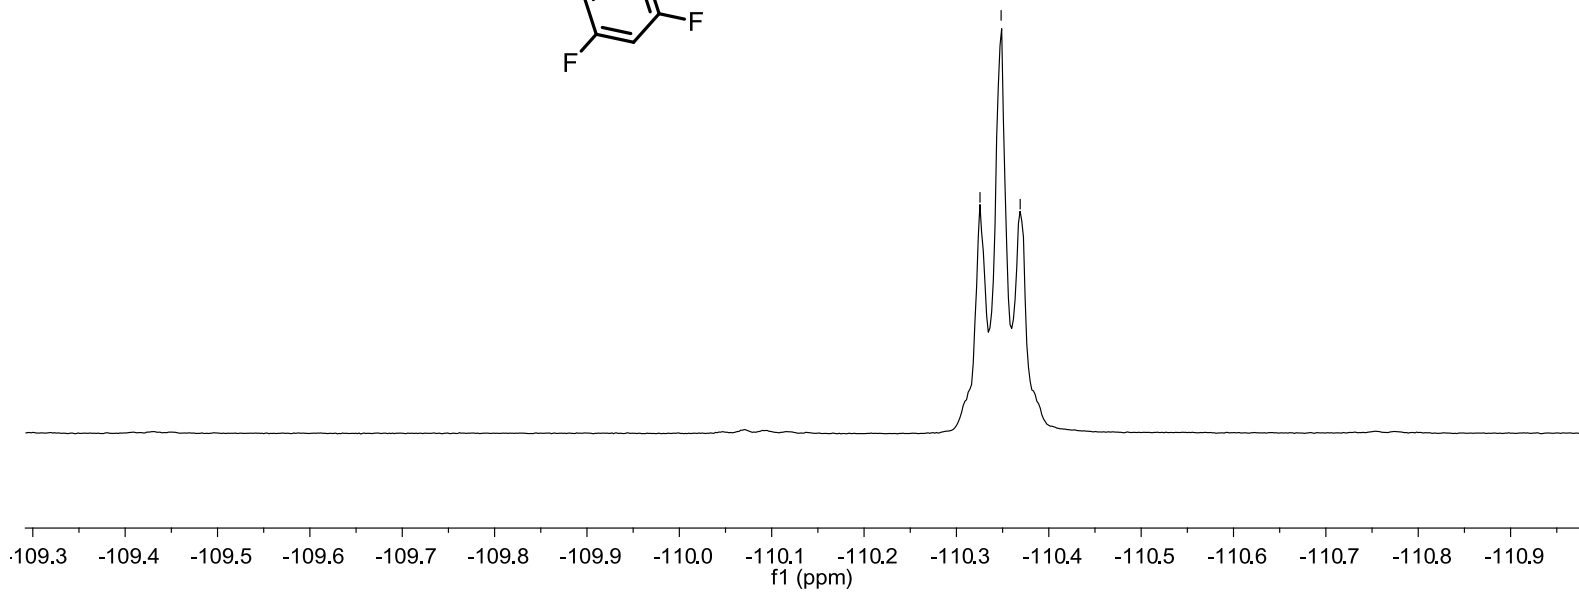

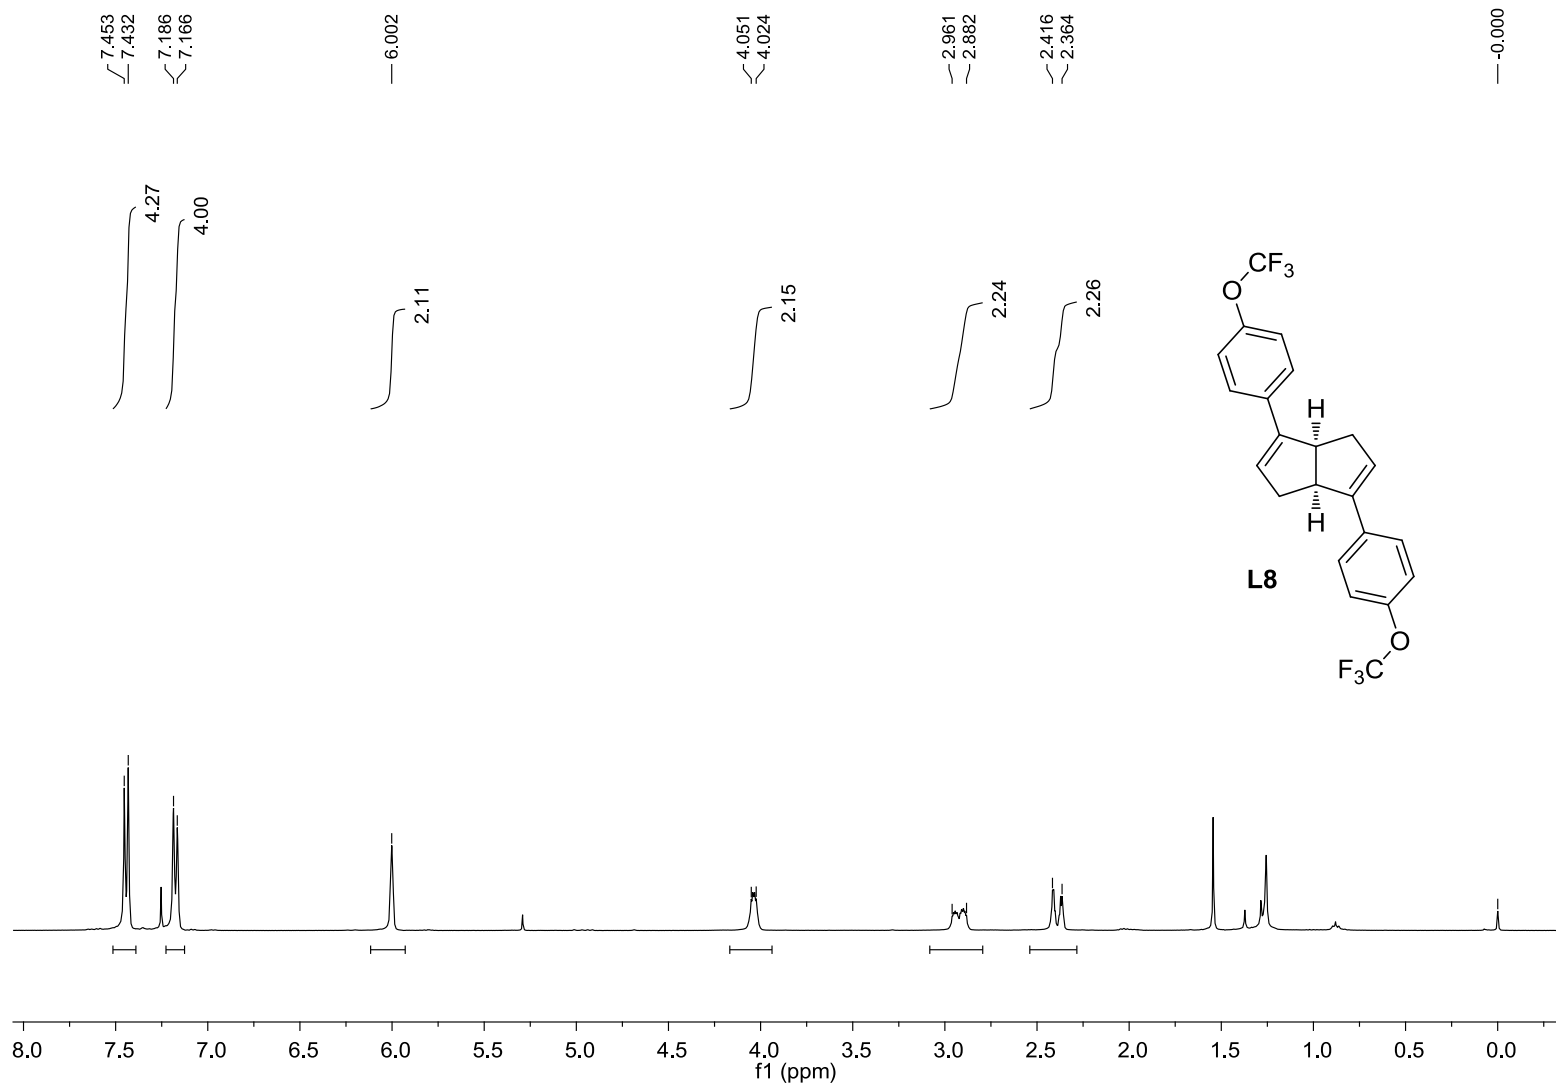

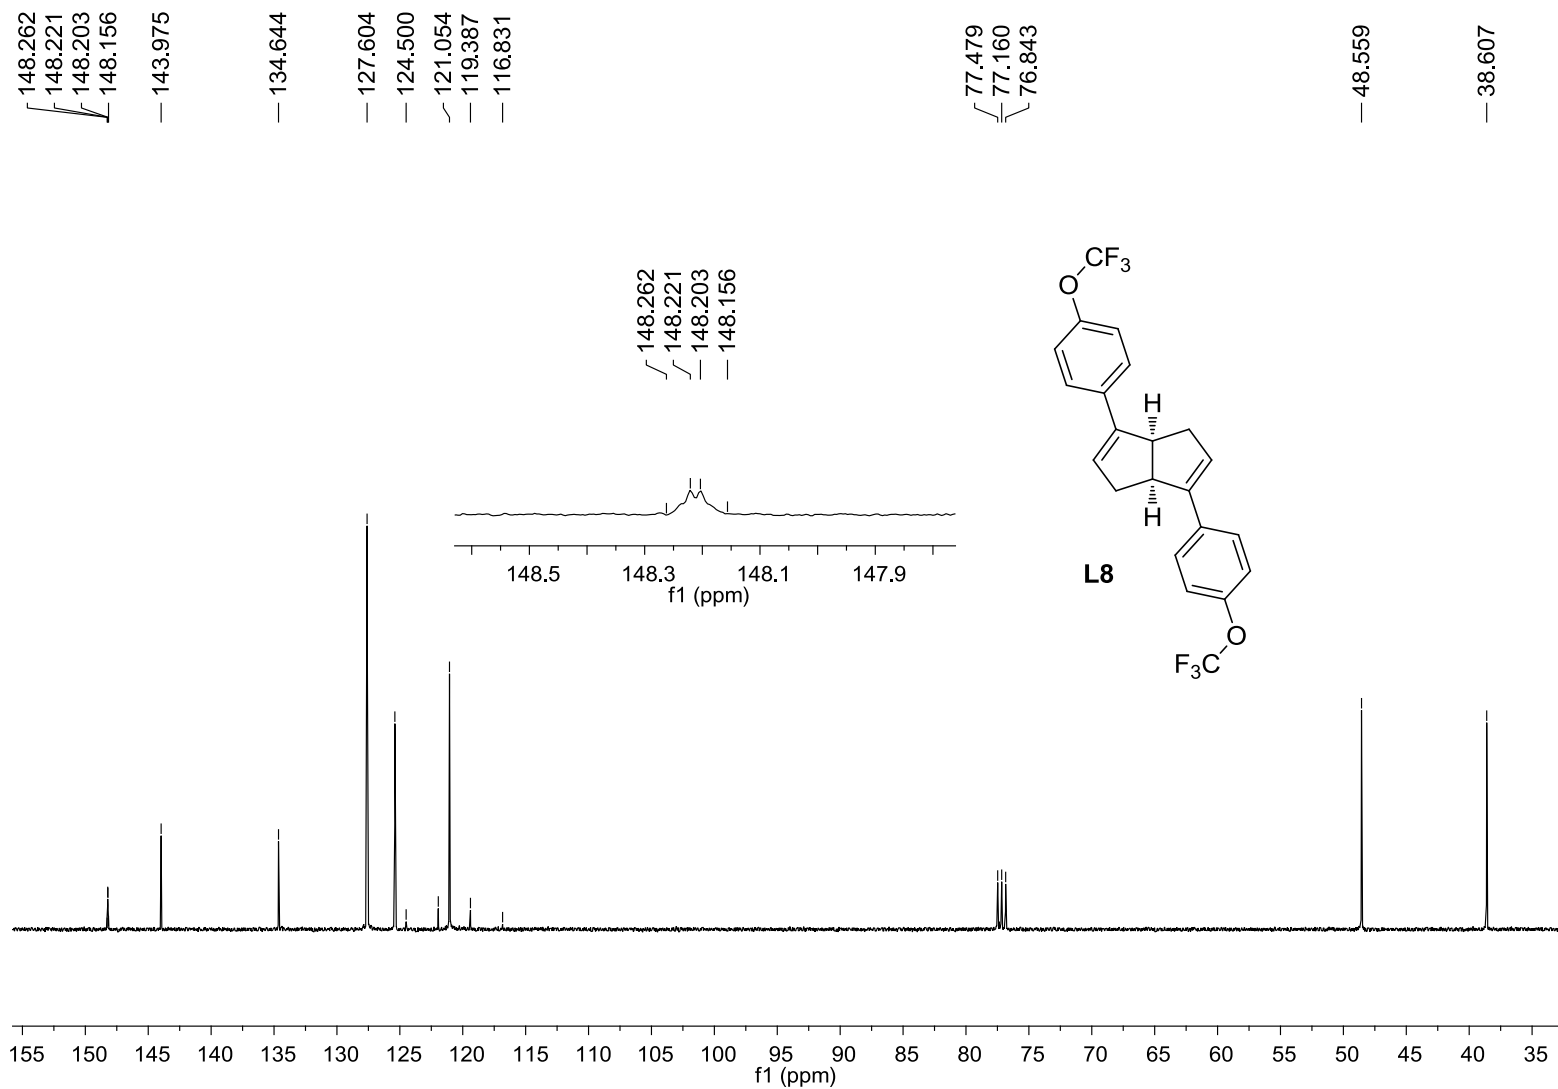

v

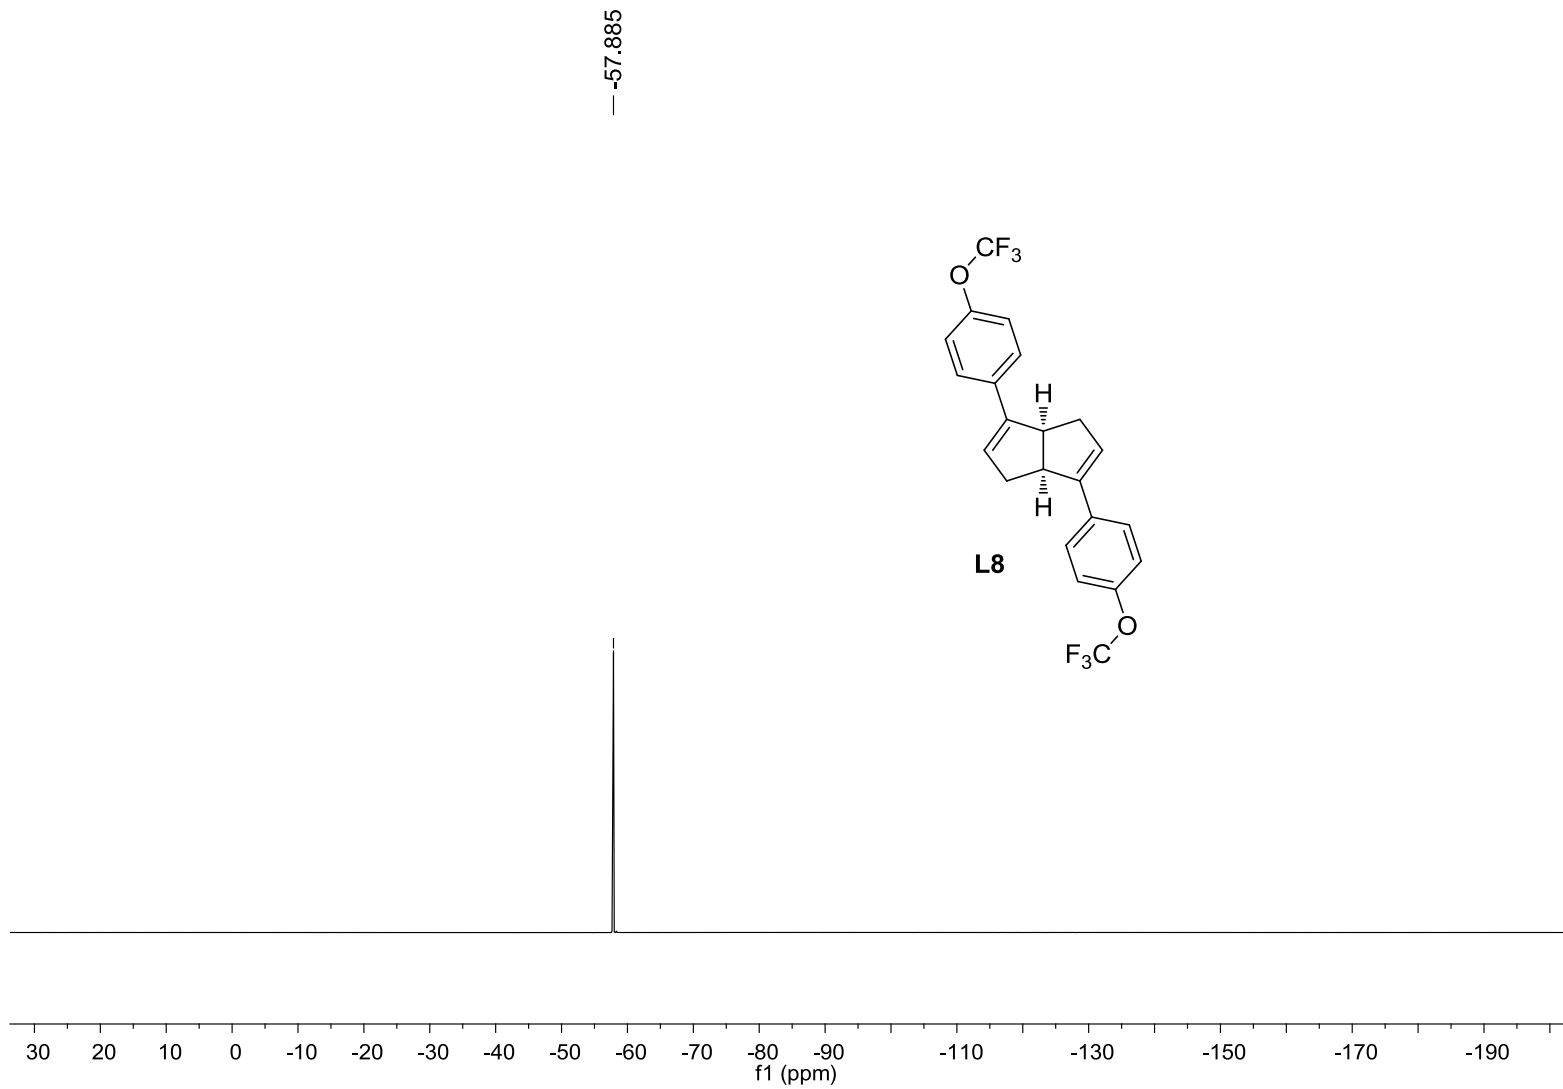

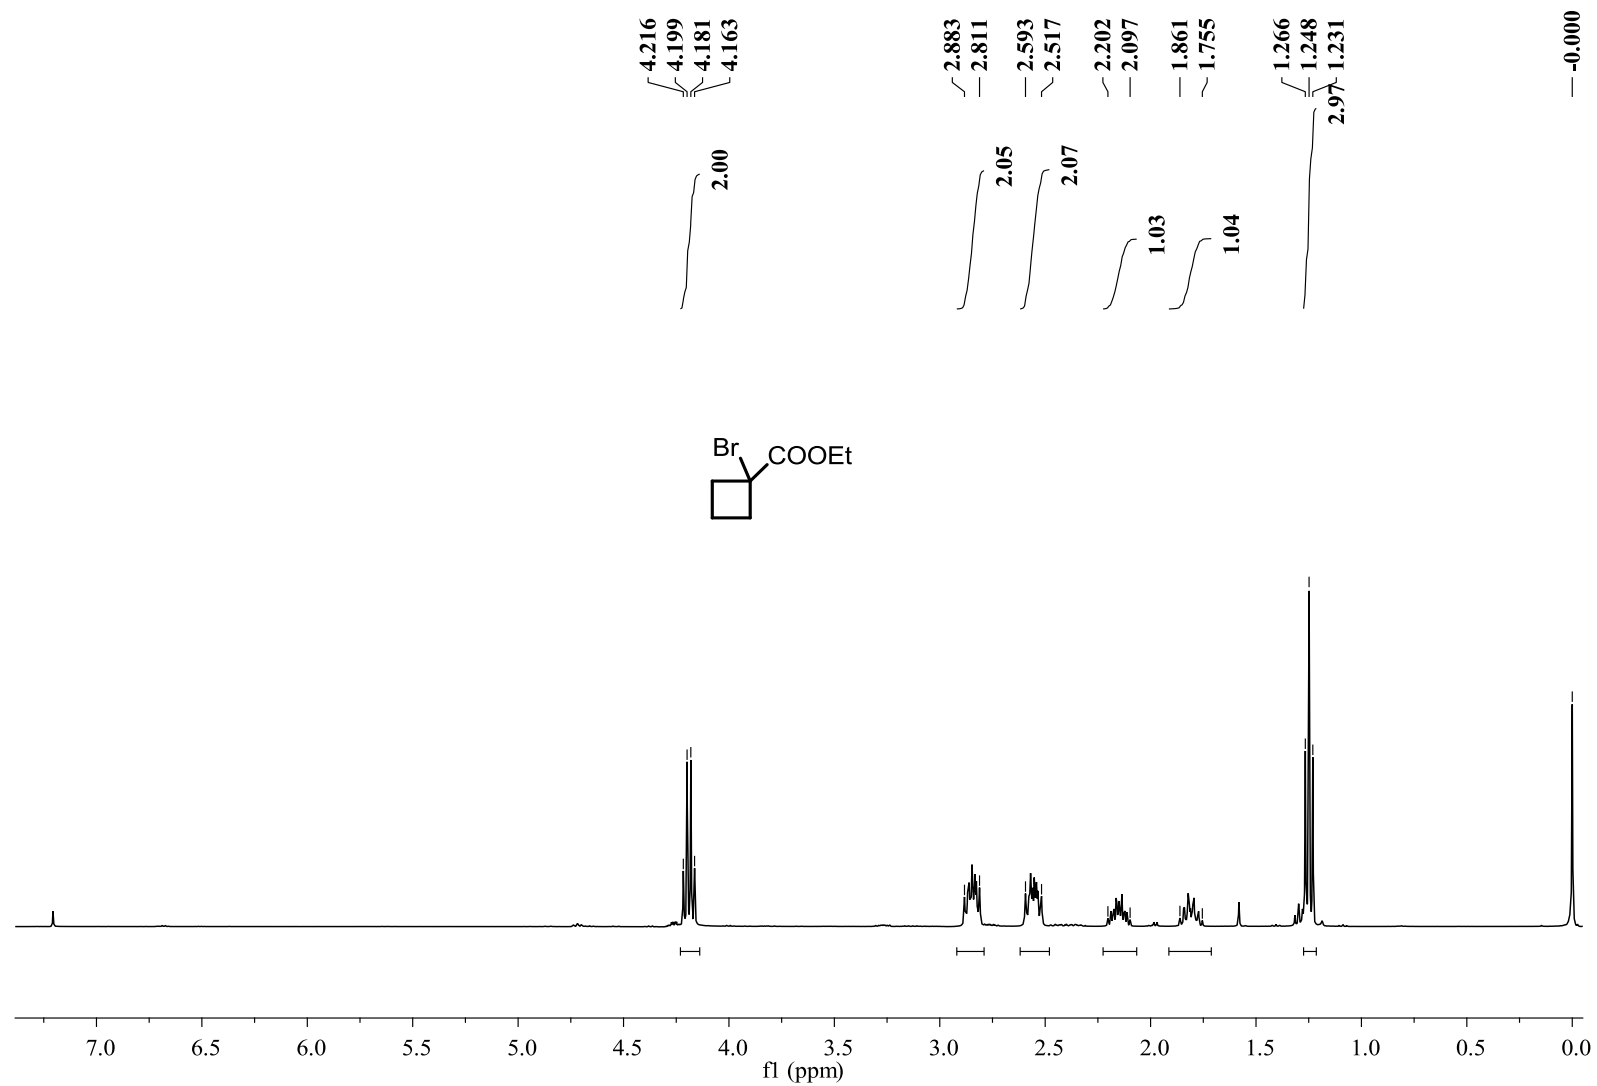

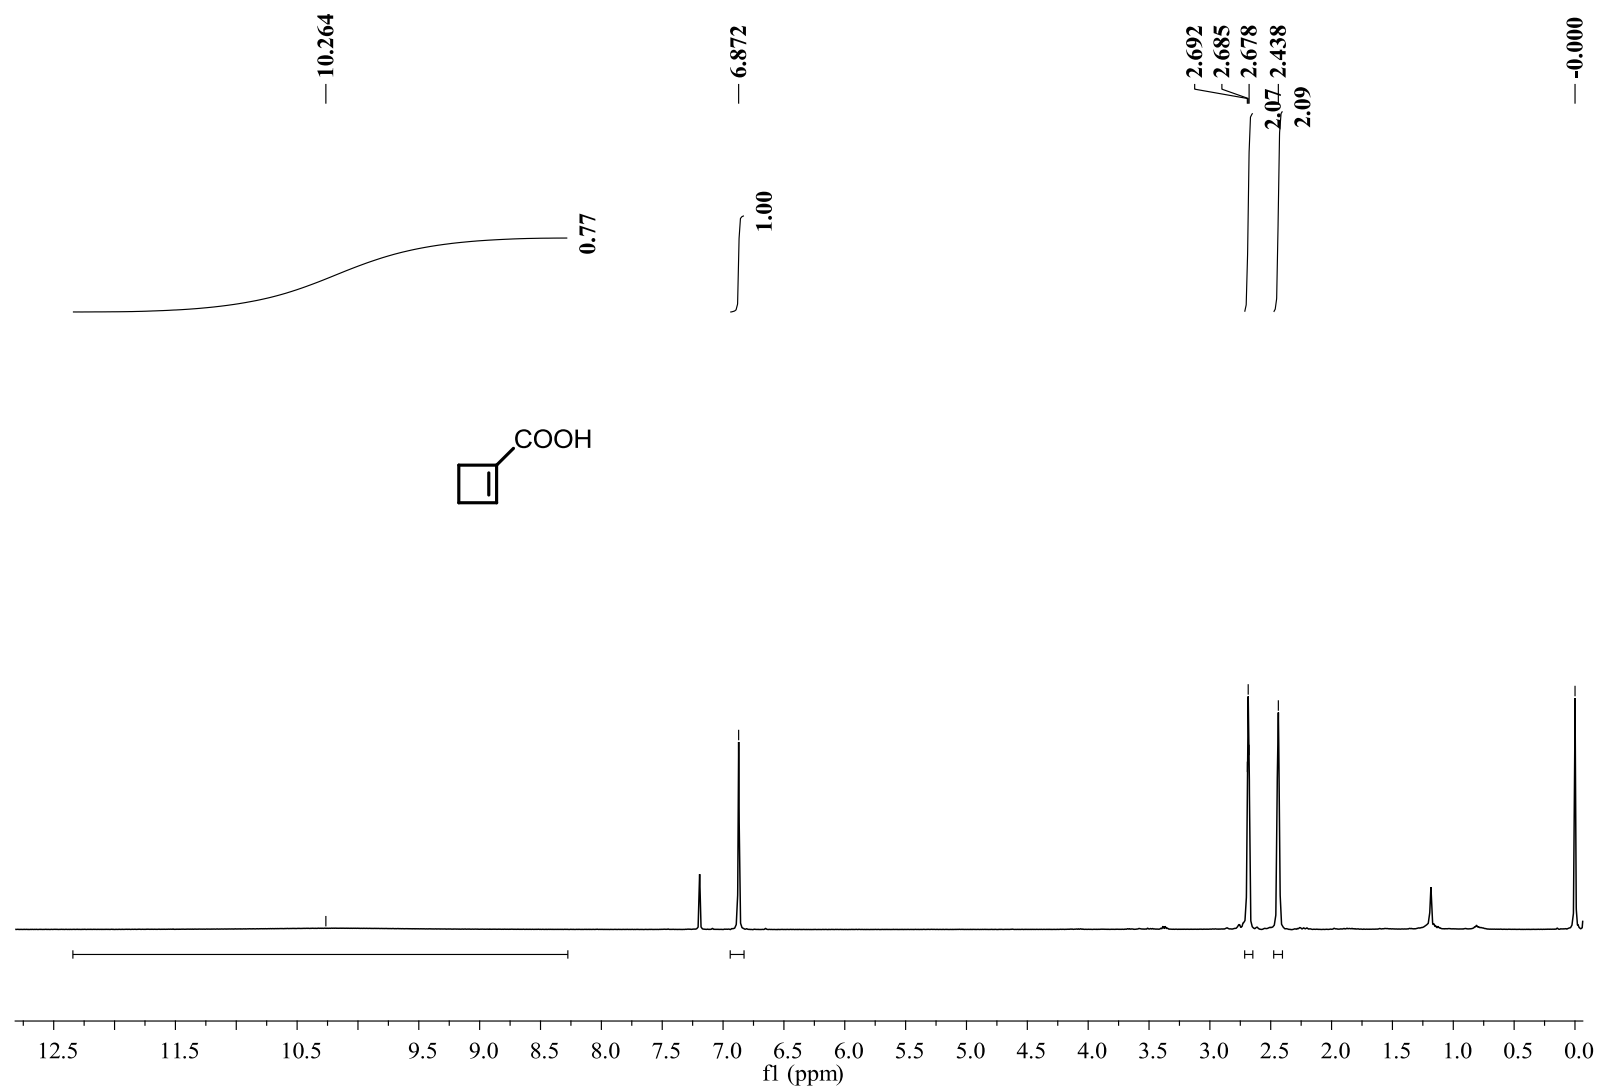

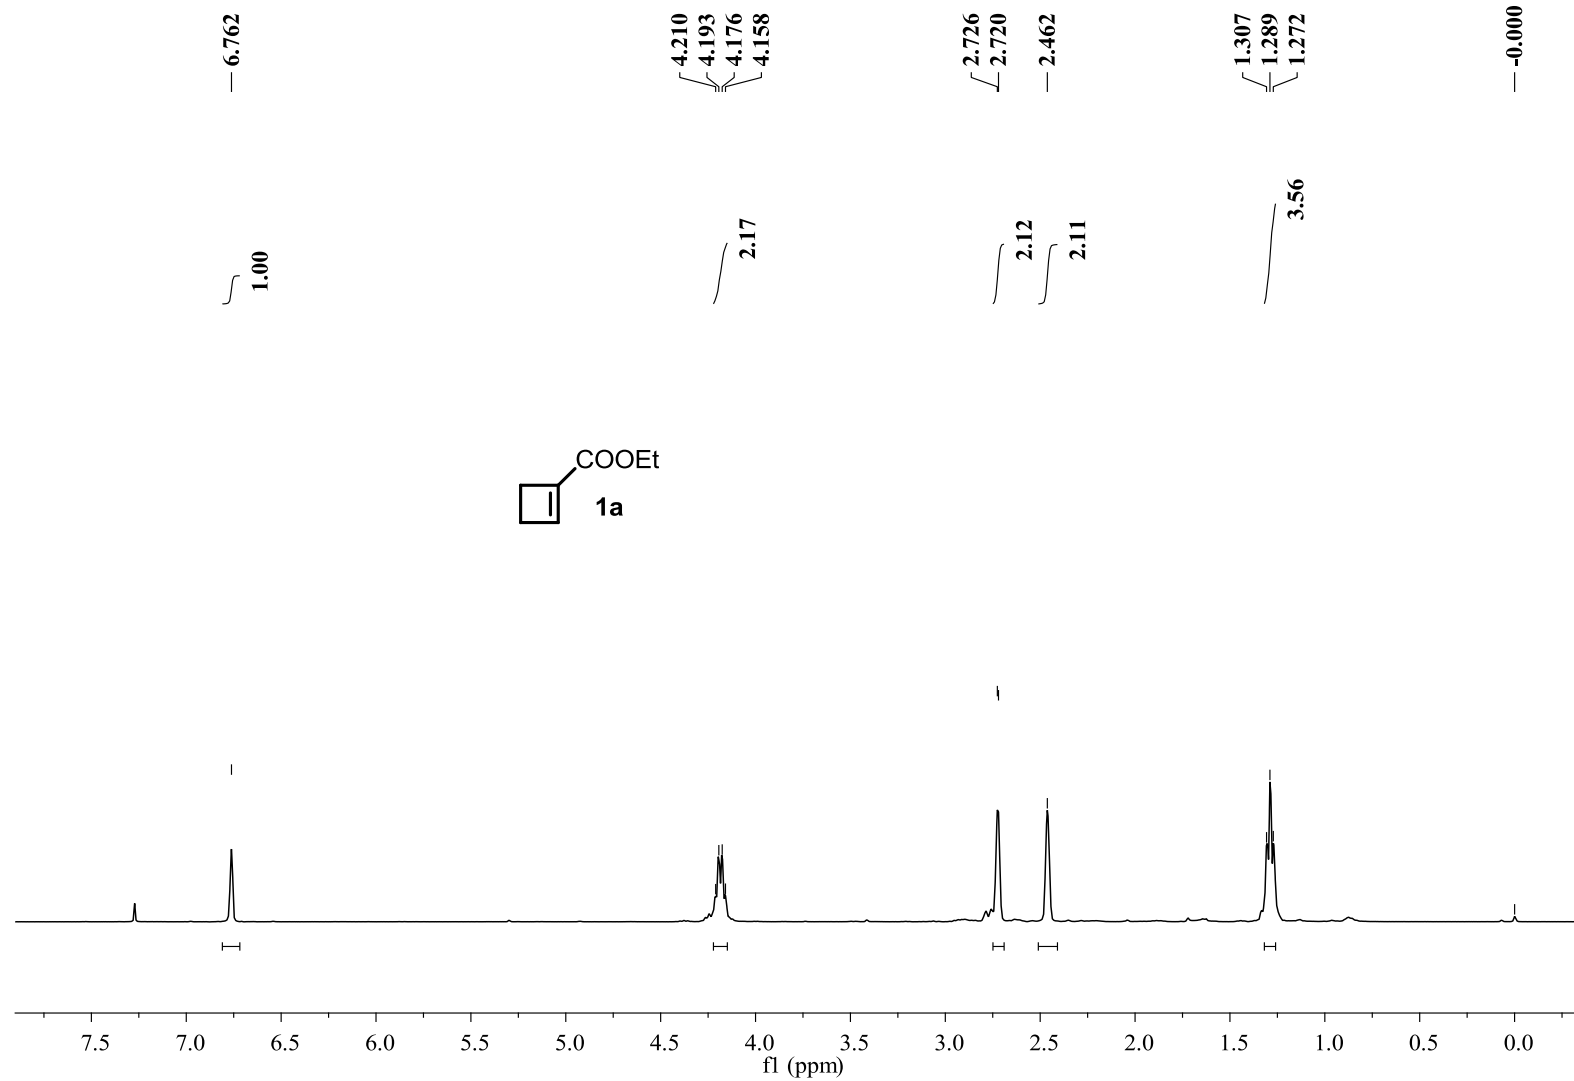

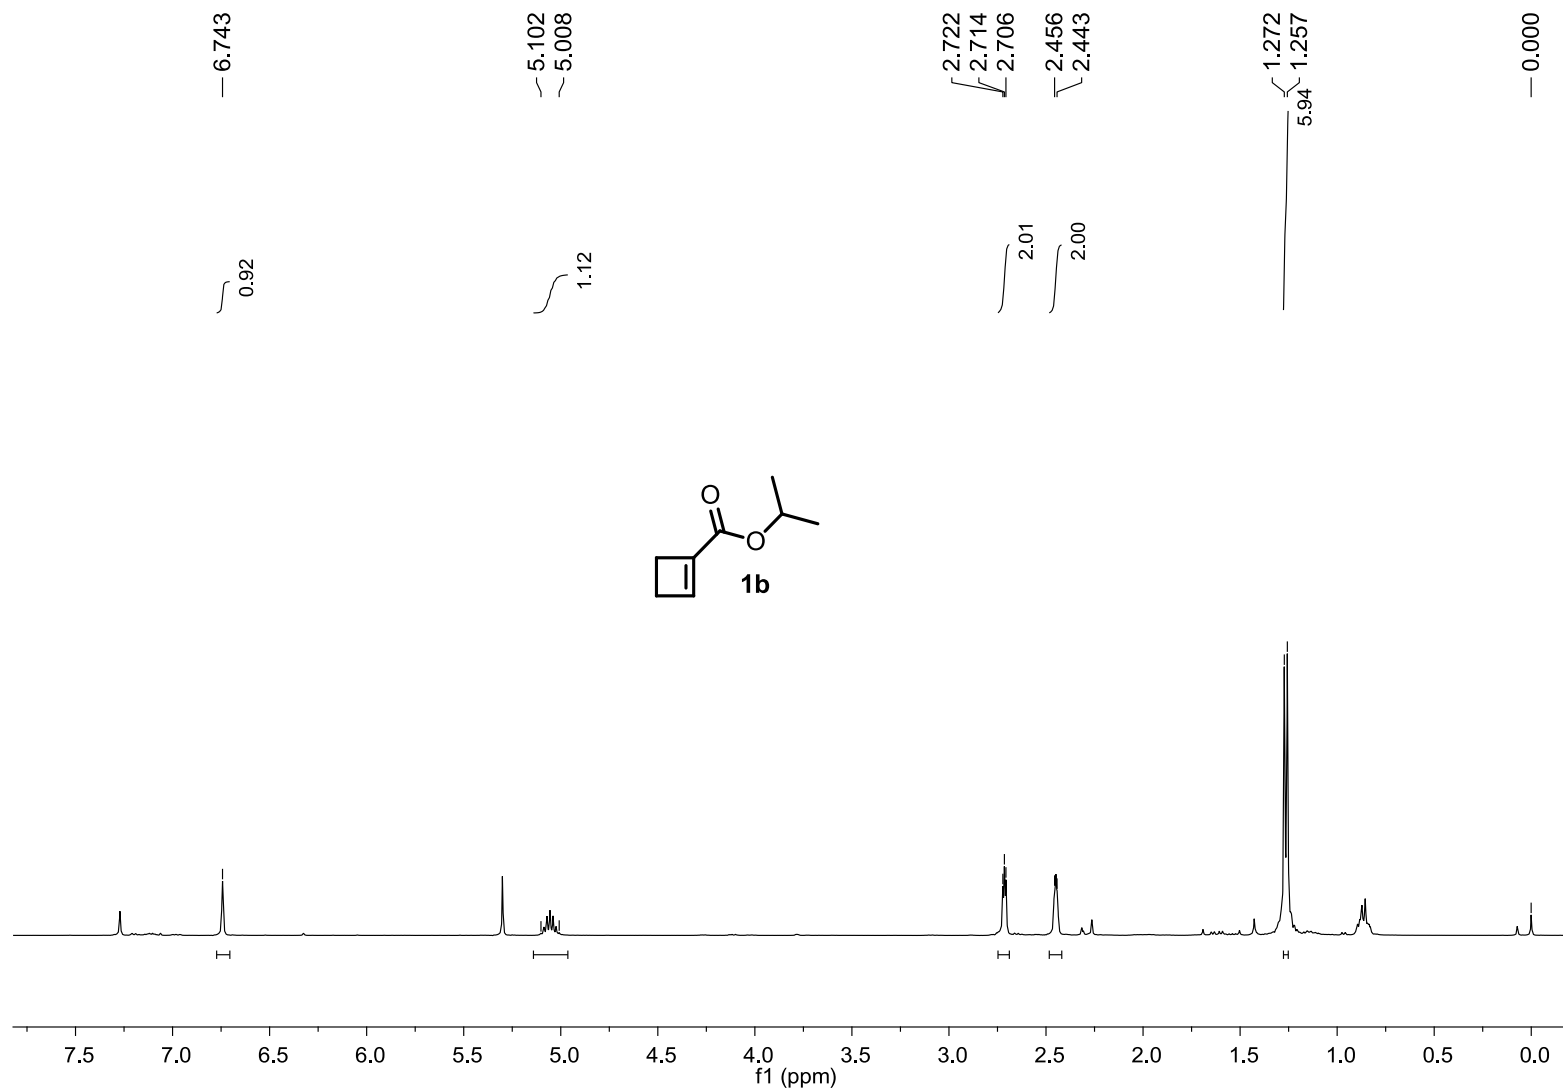



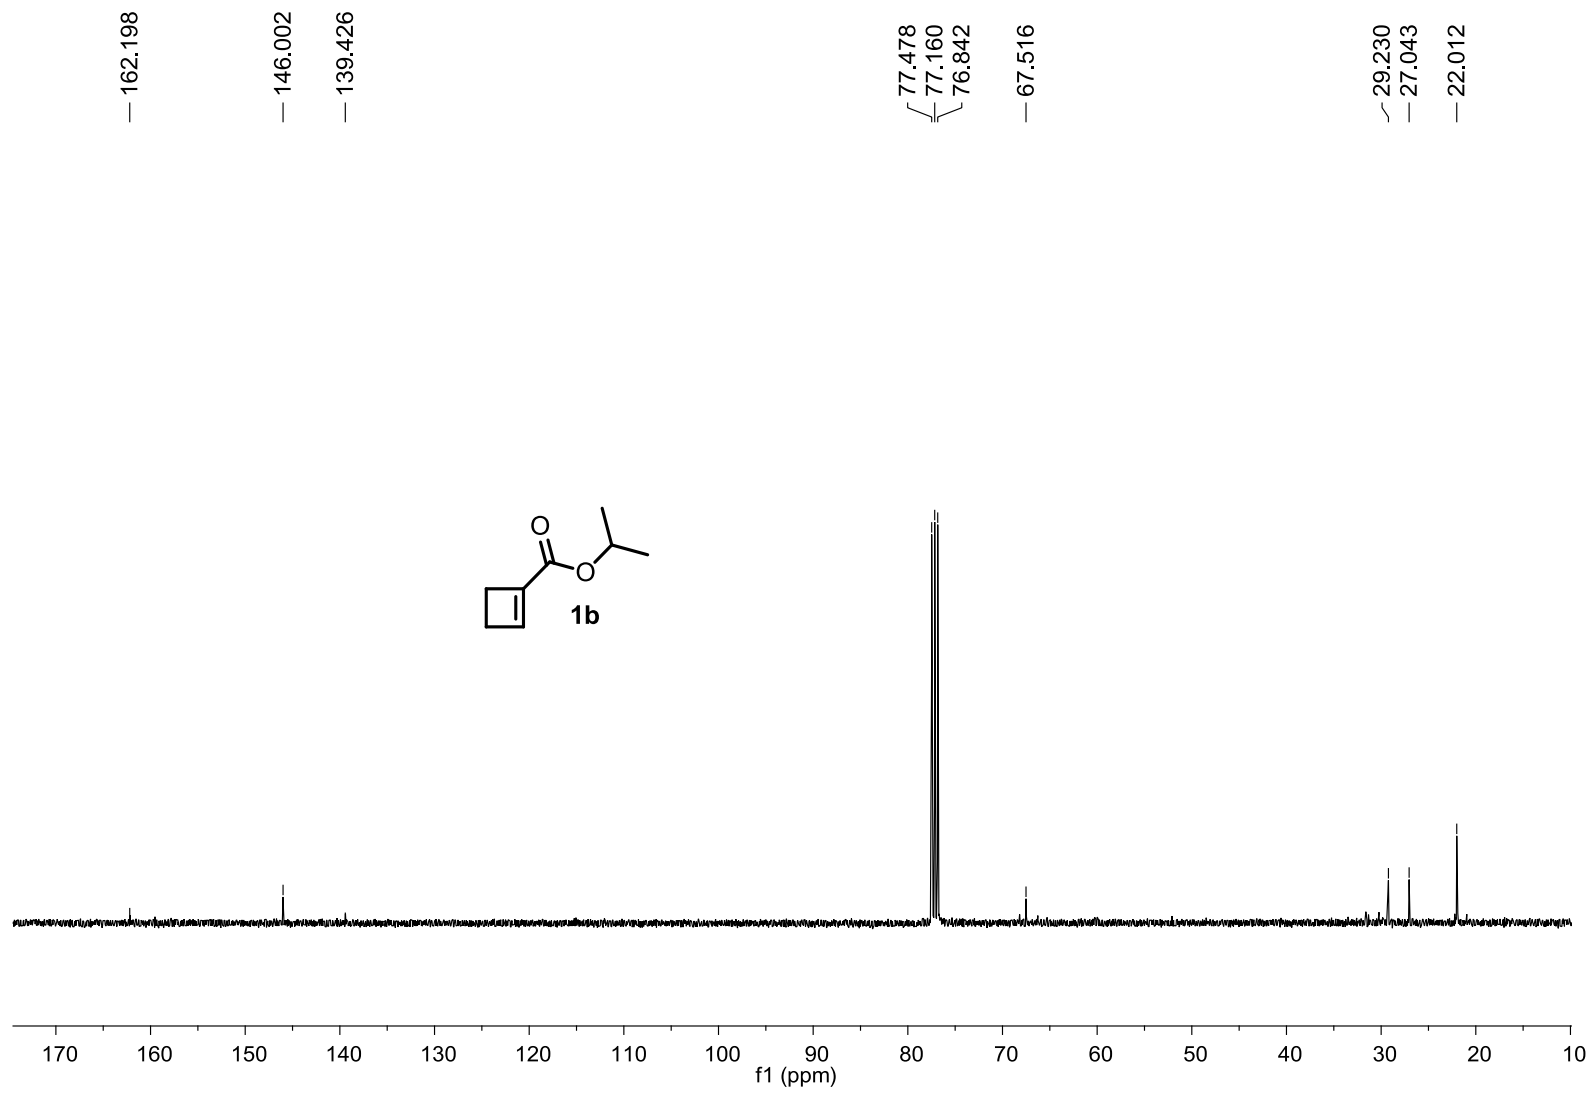

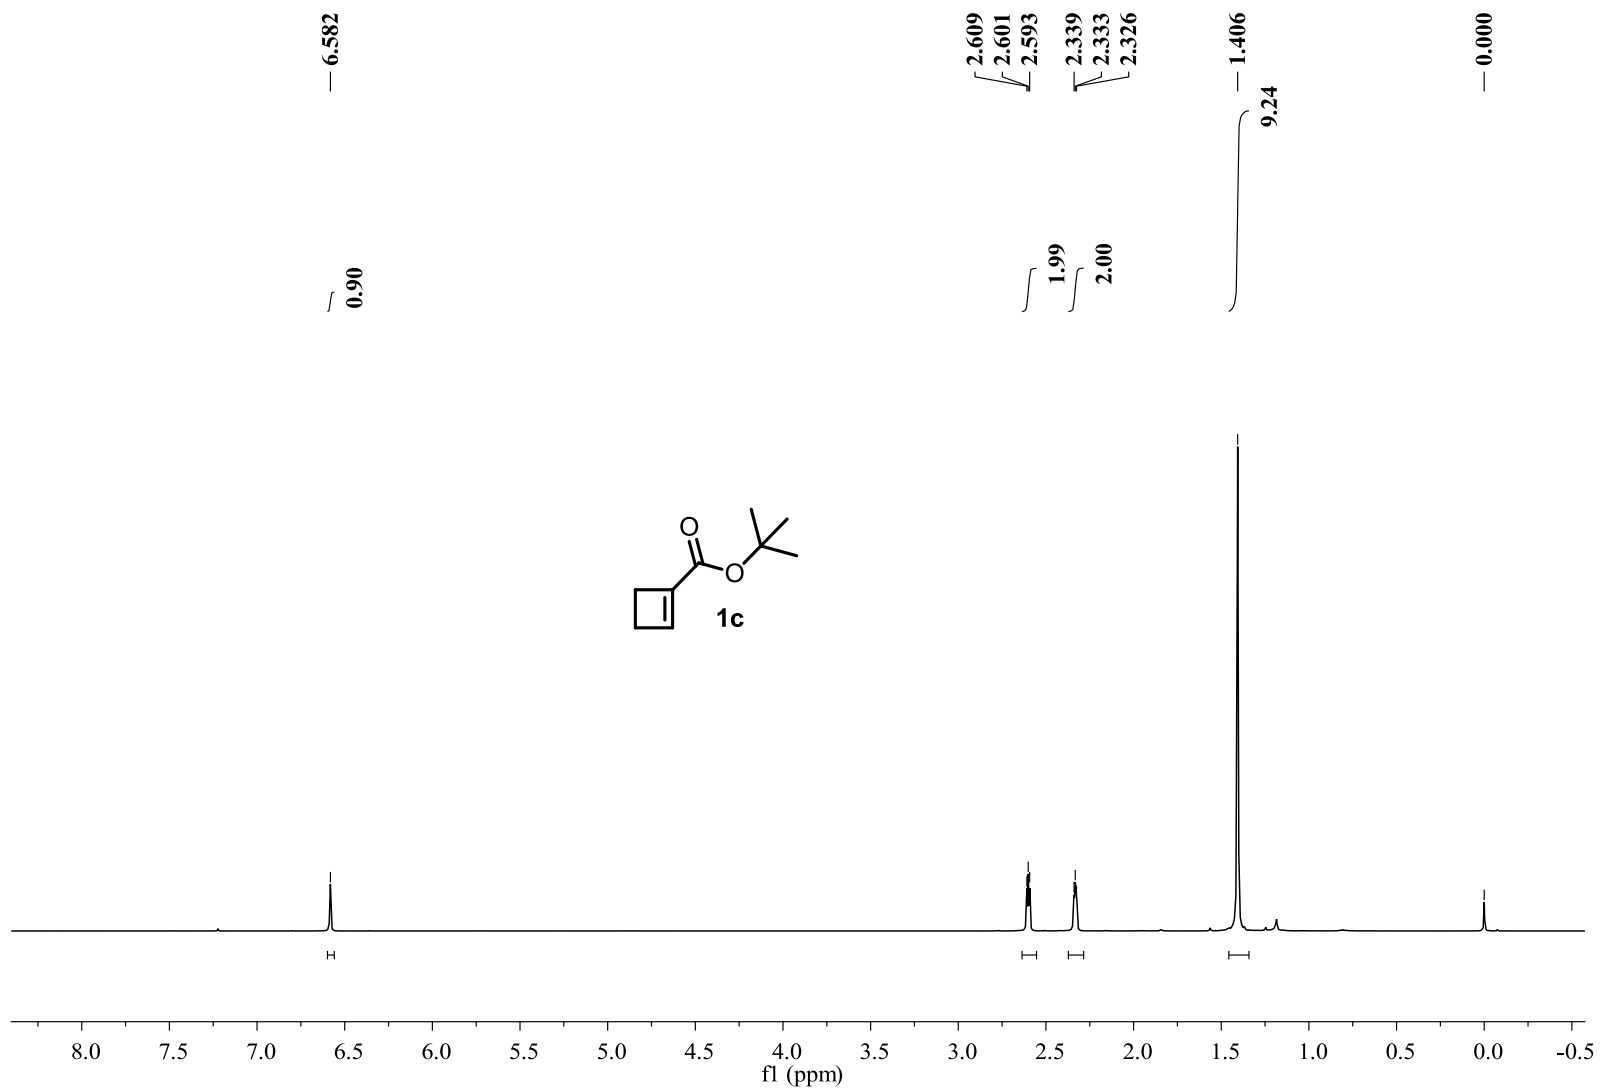

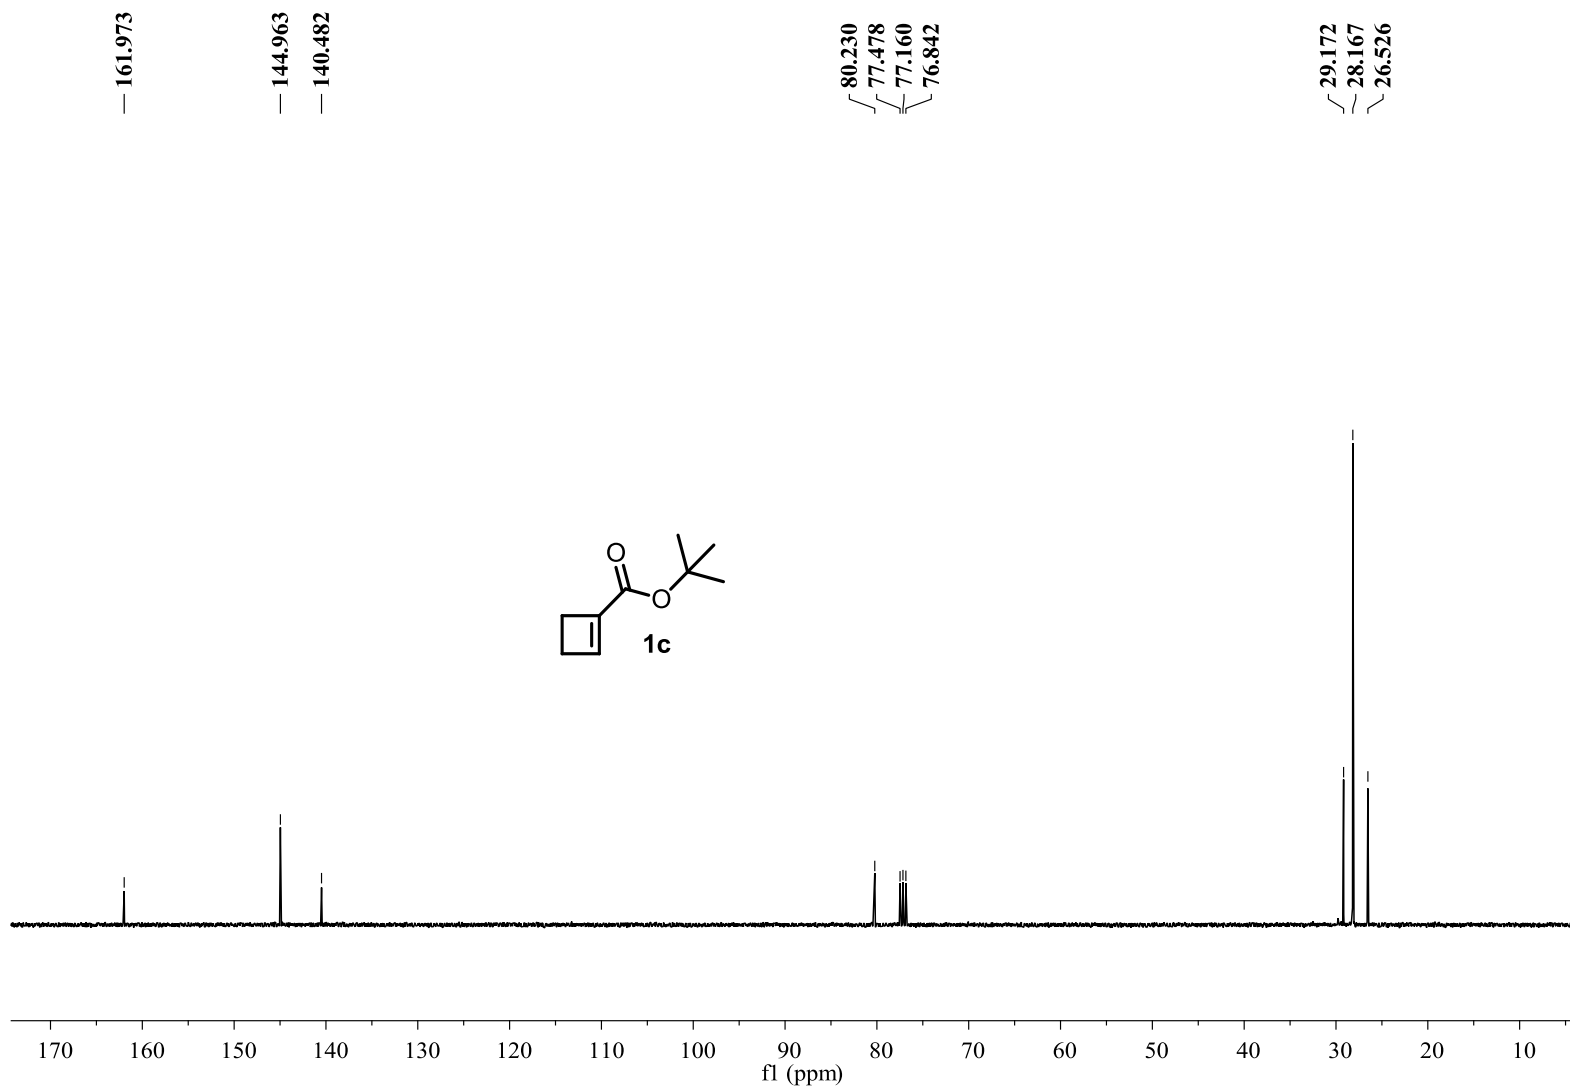

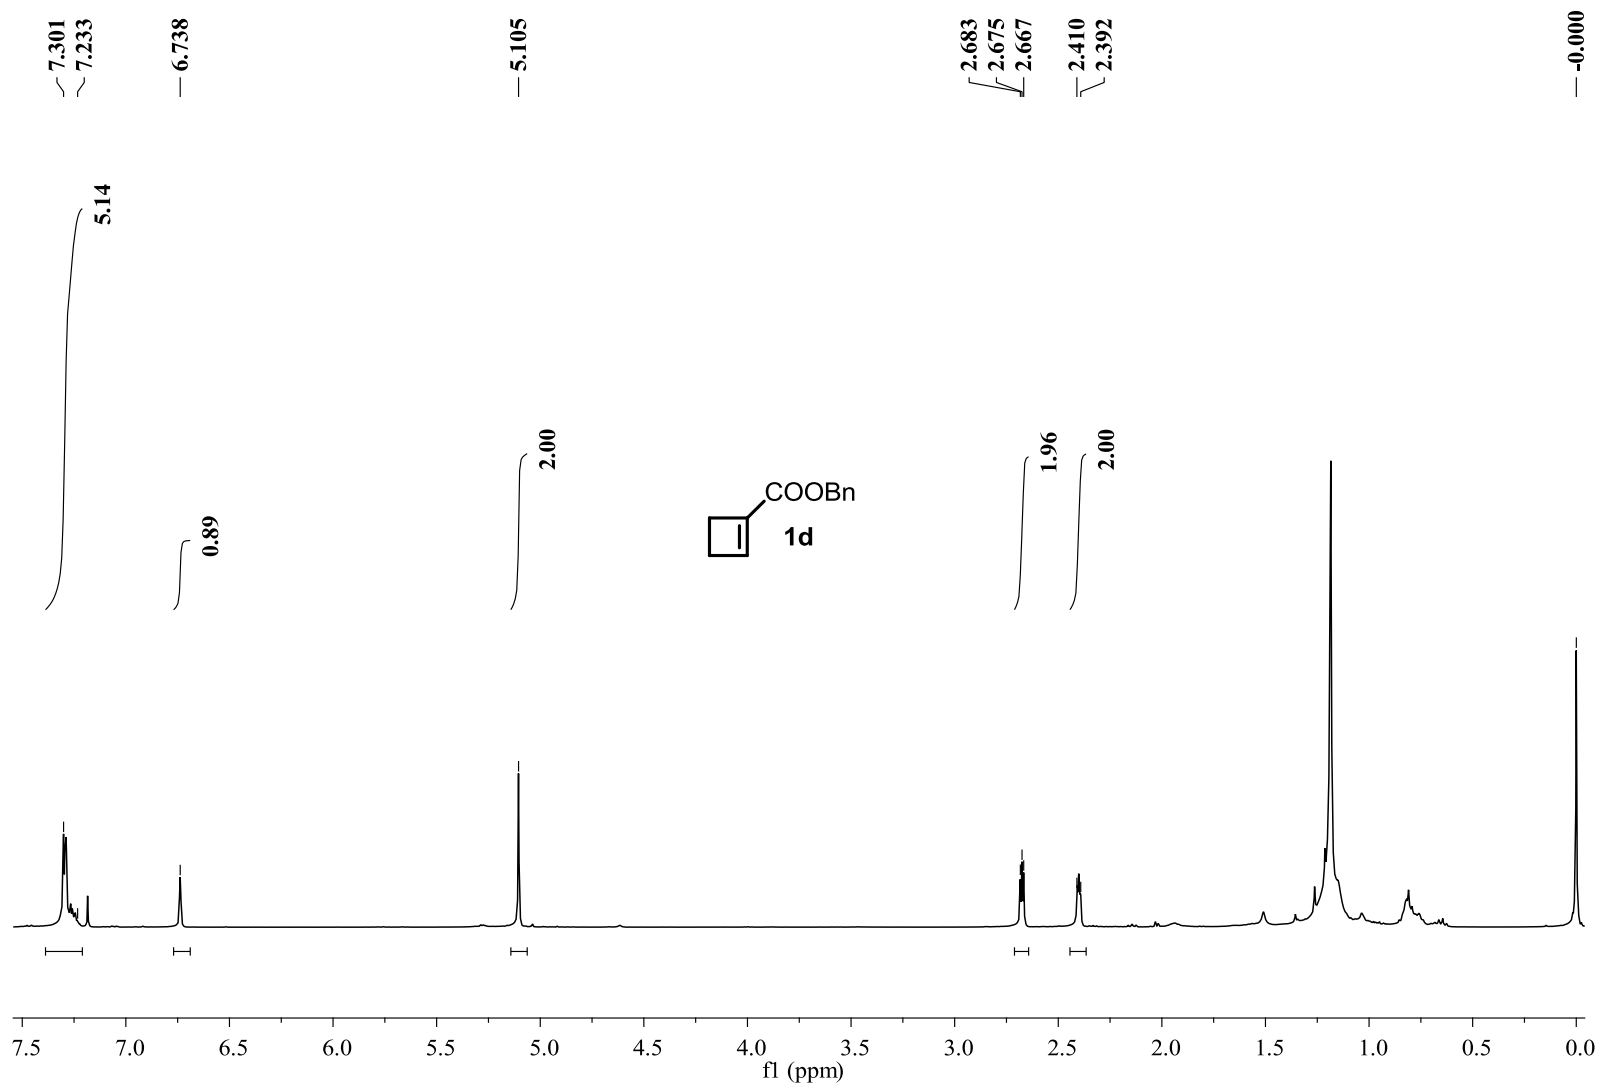

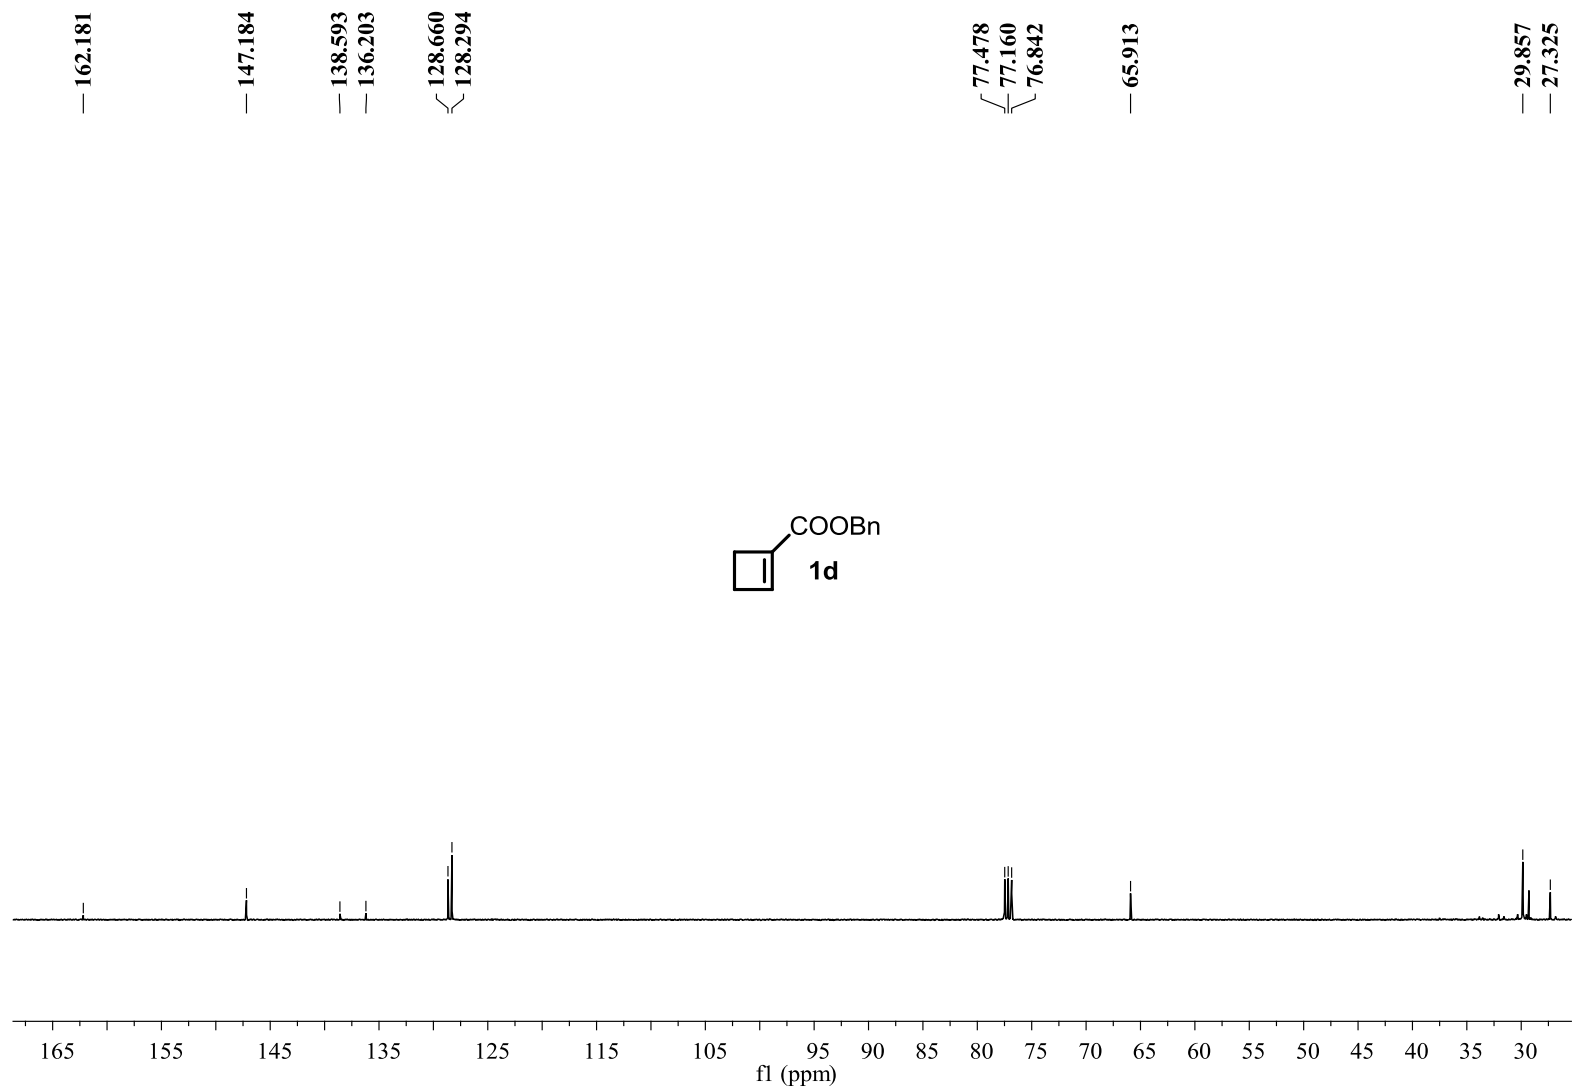

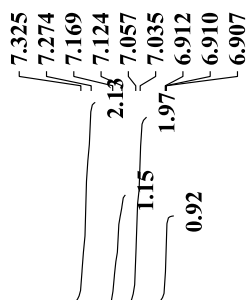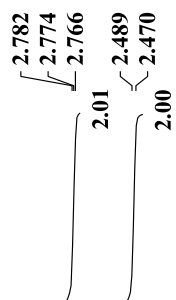

— -0.000

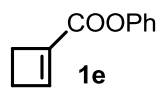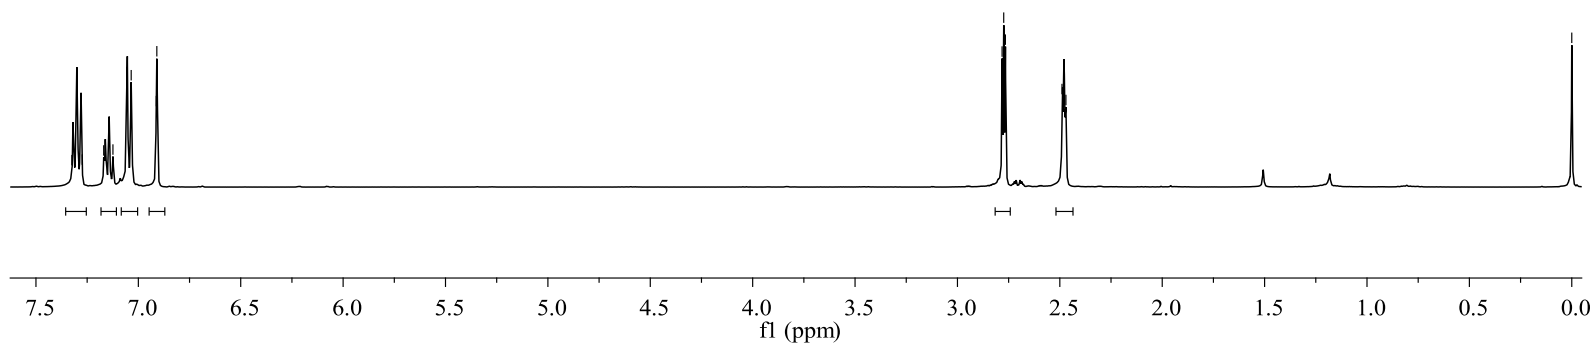

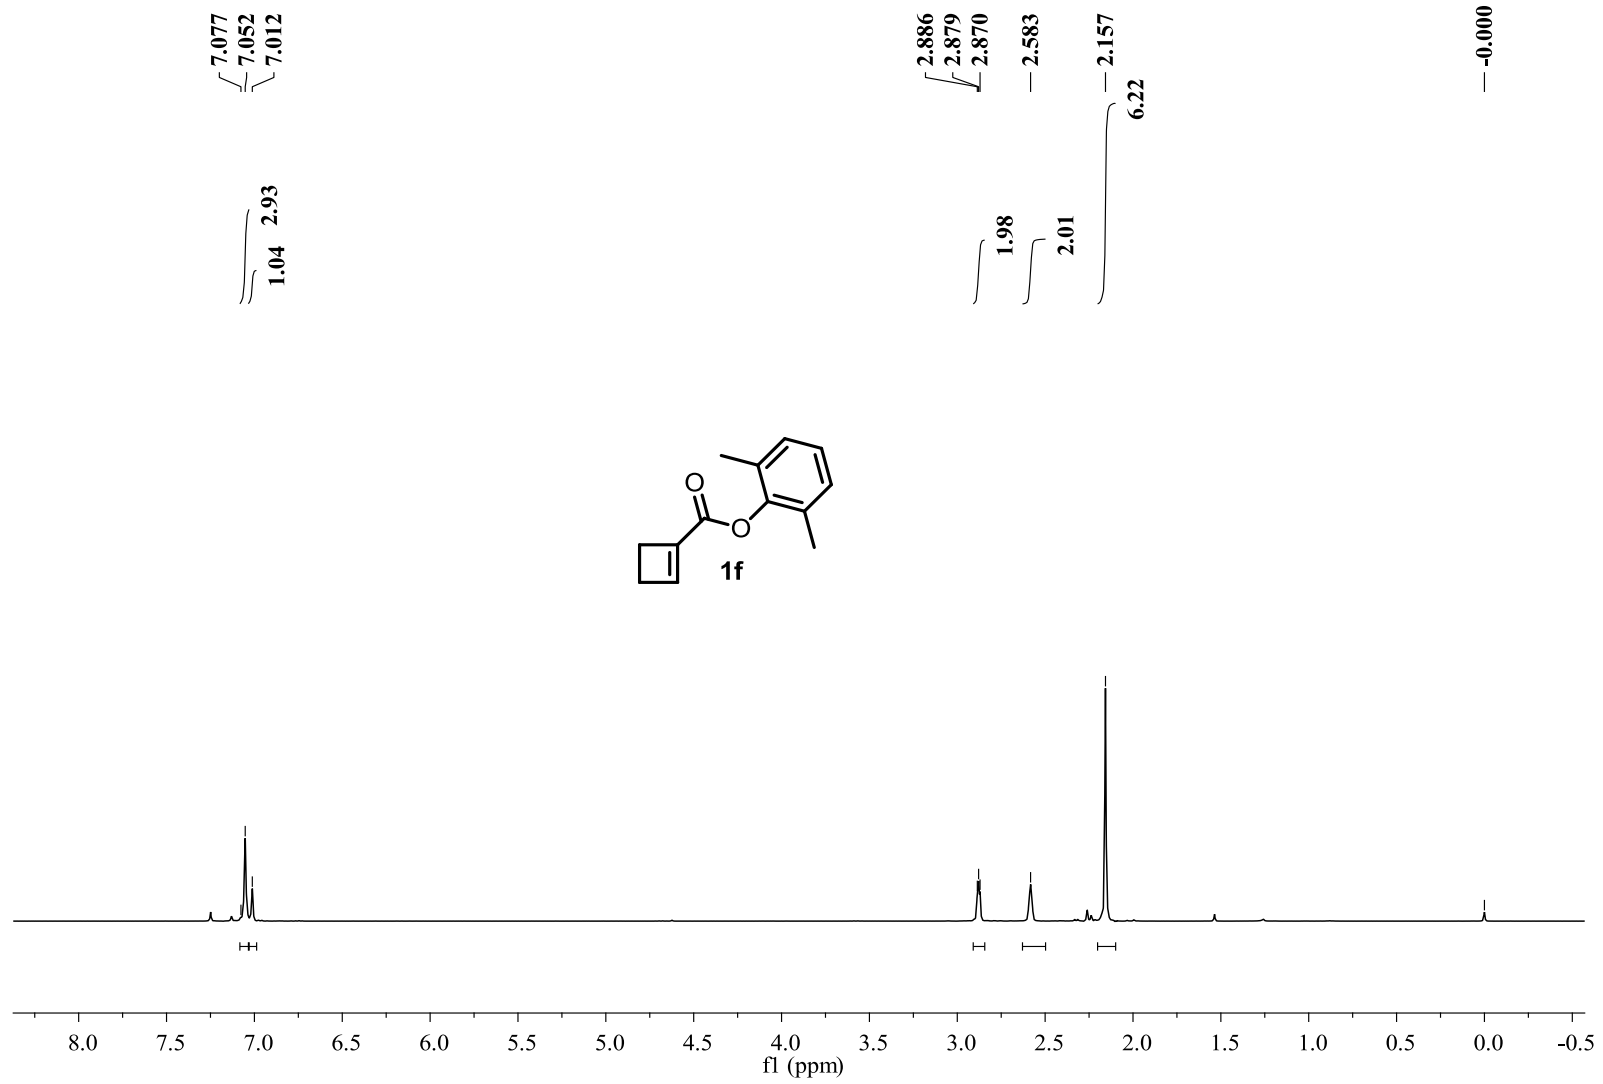

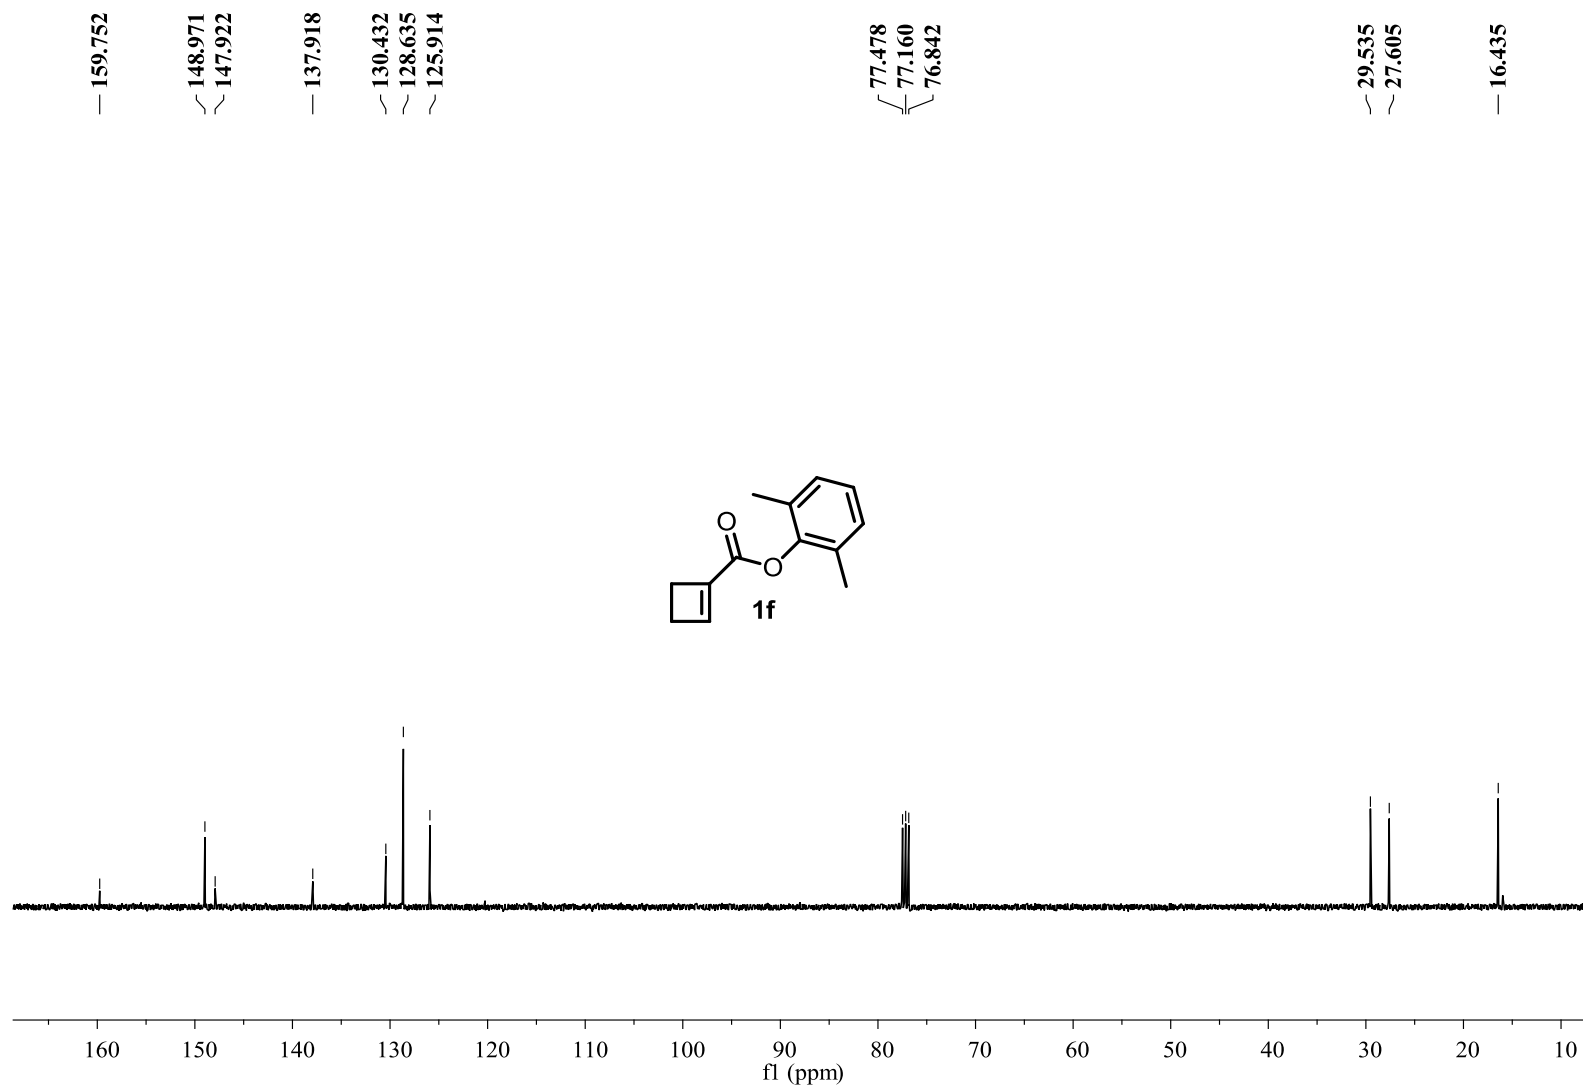



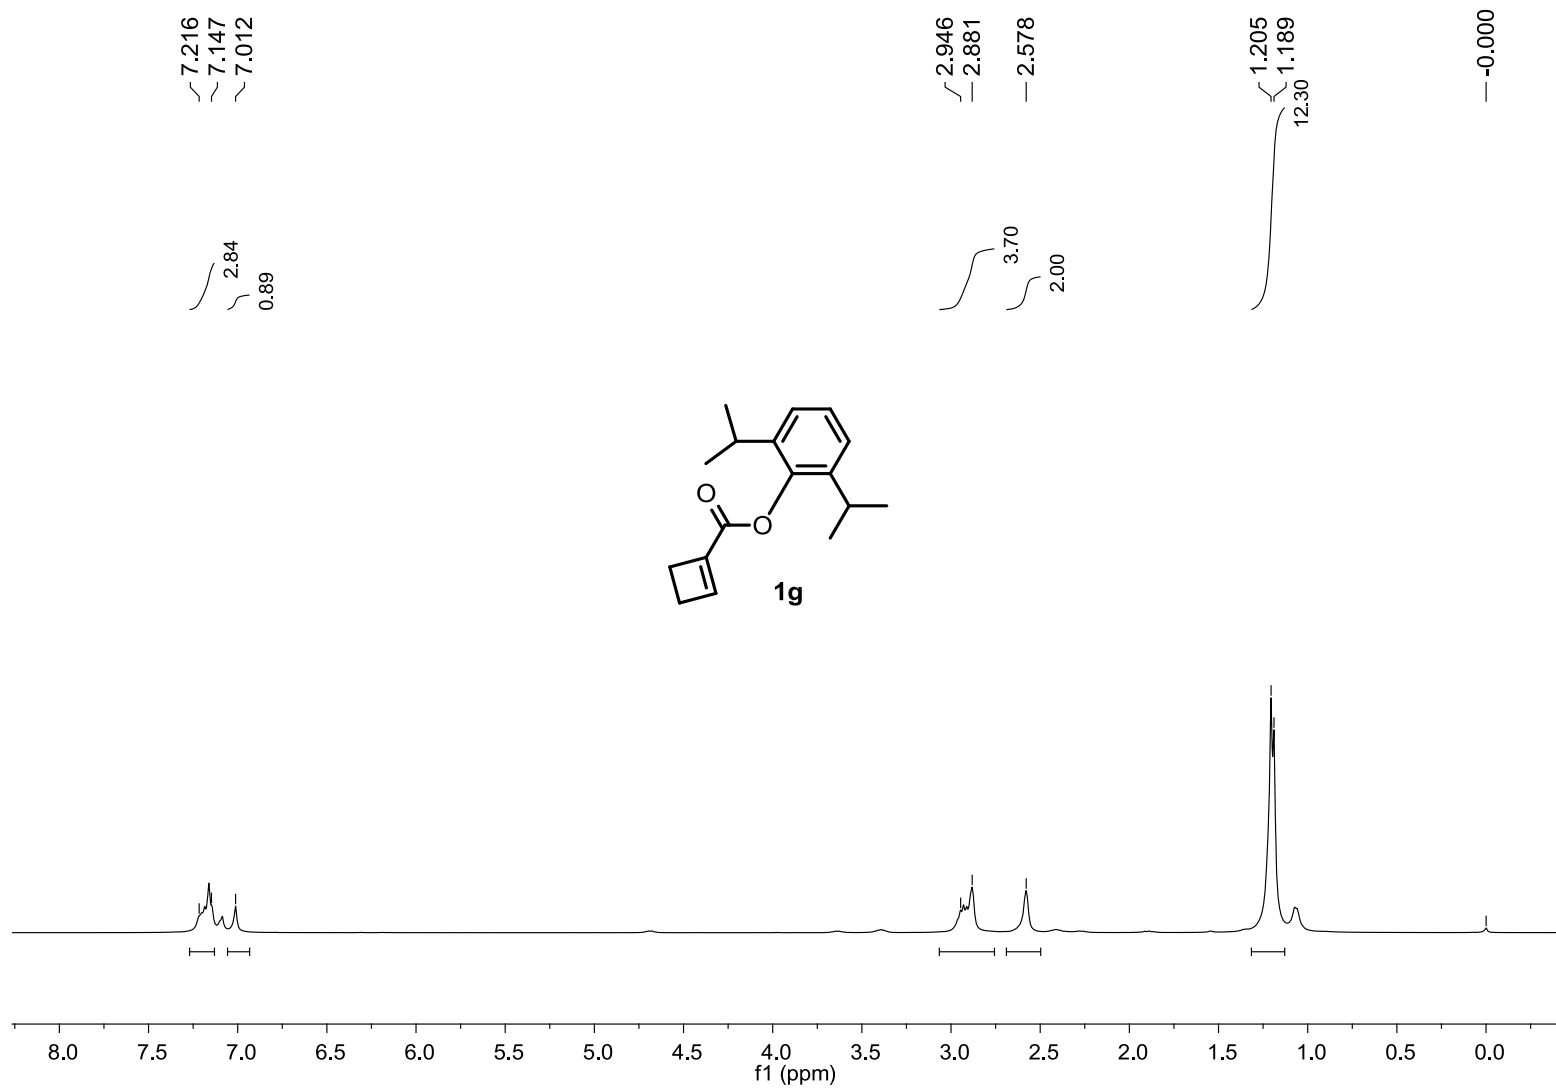

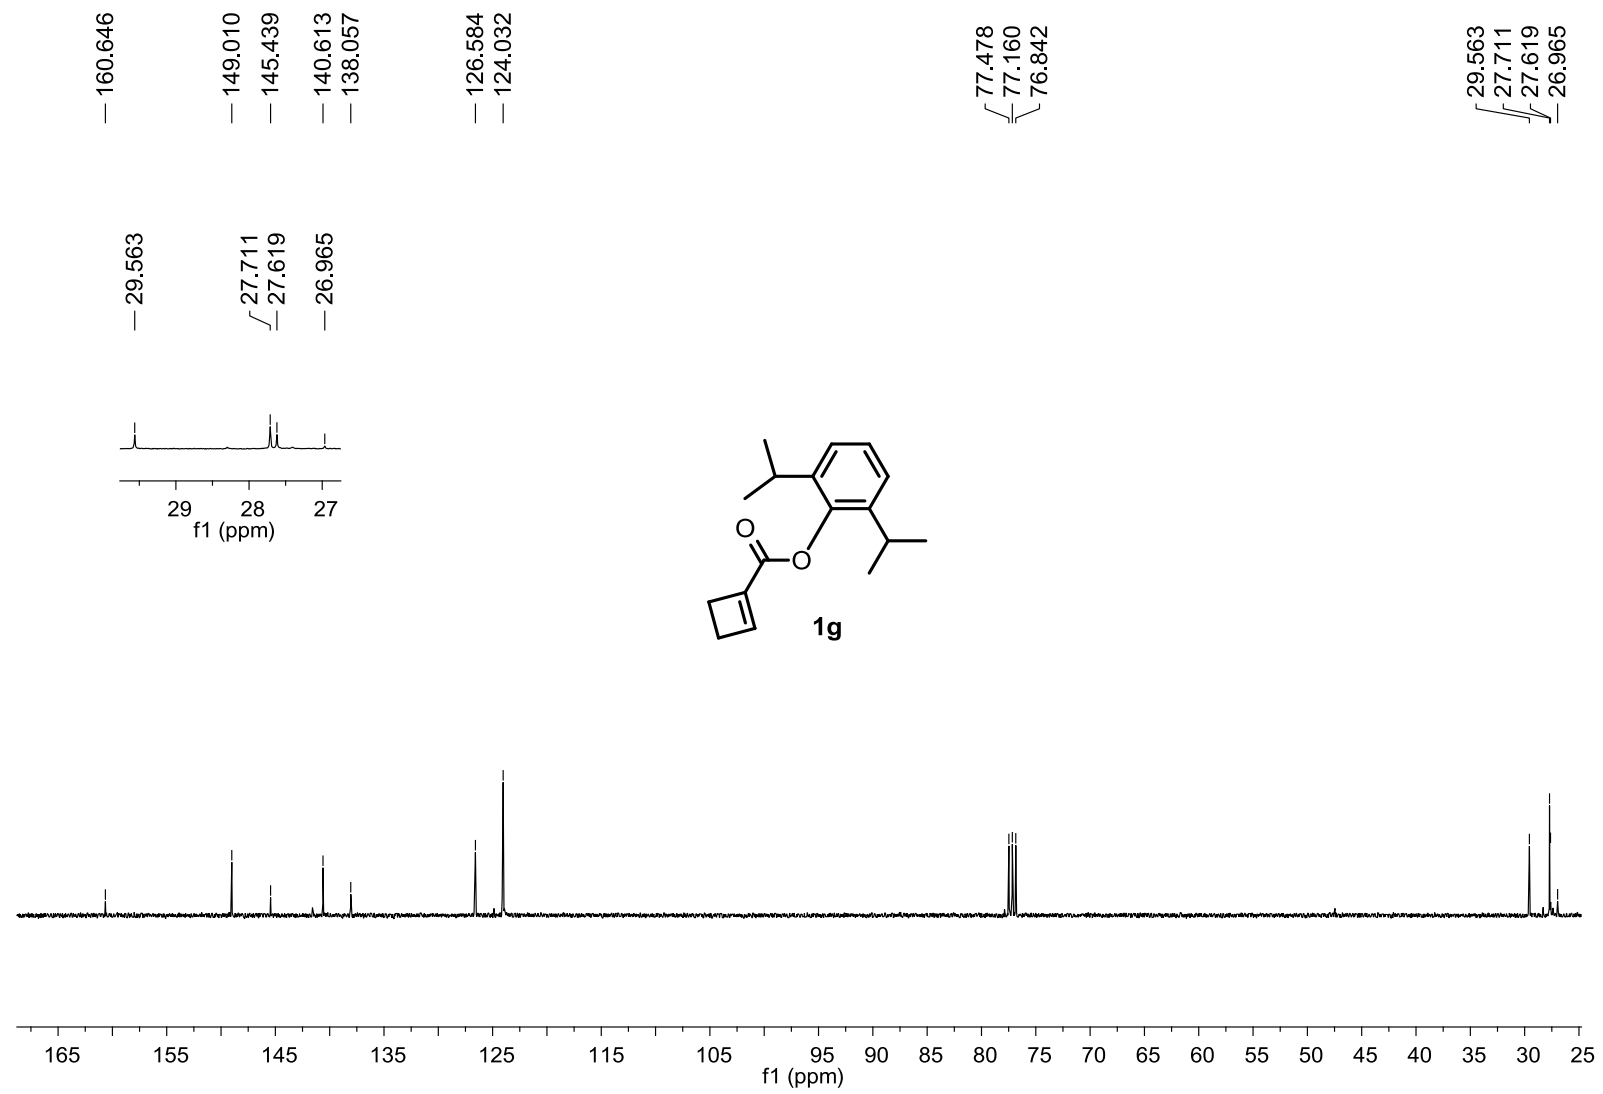

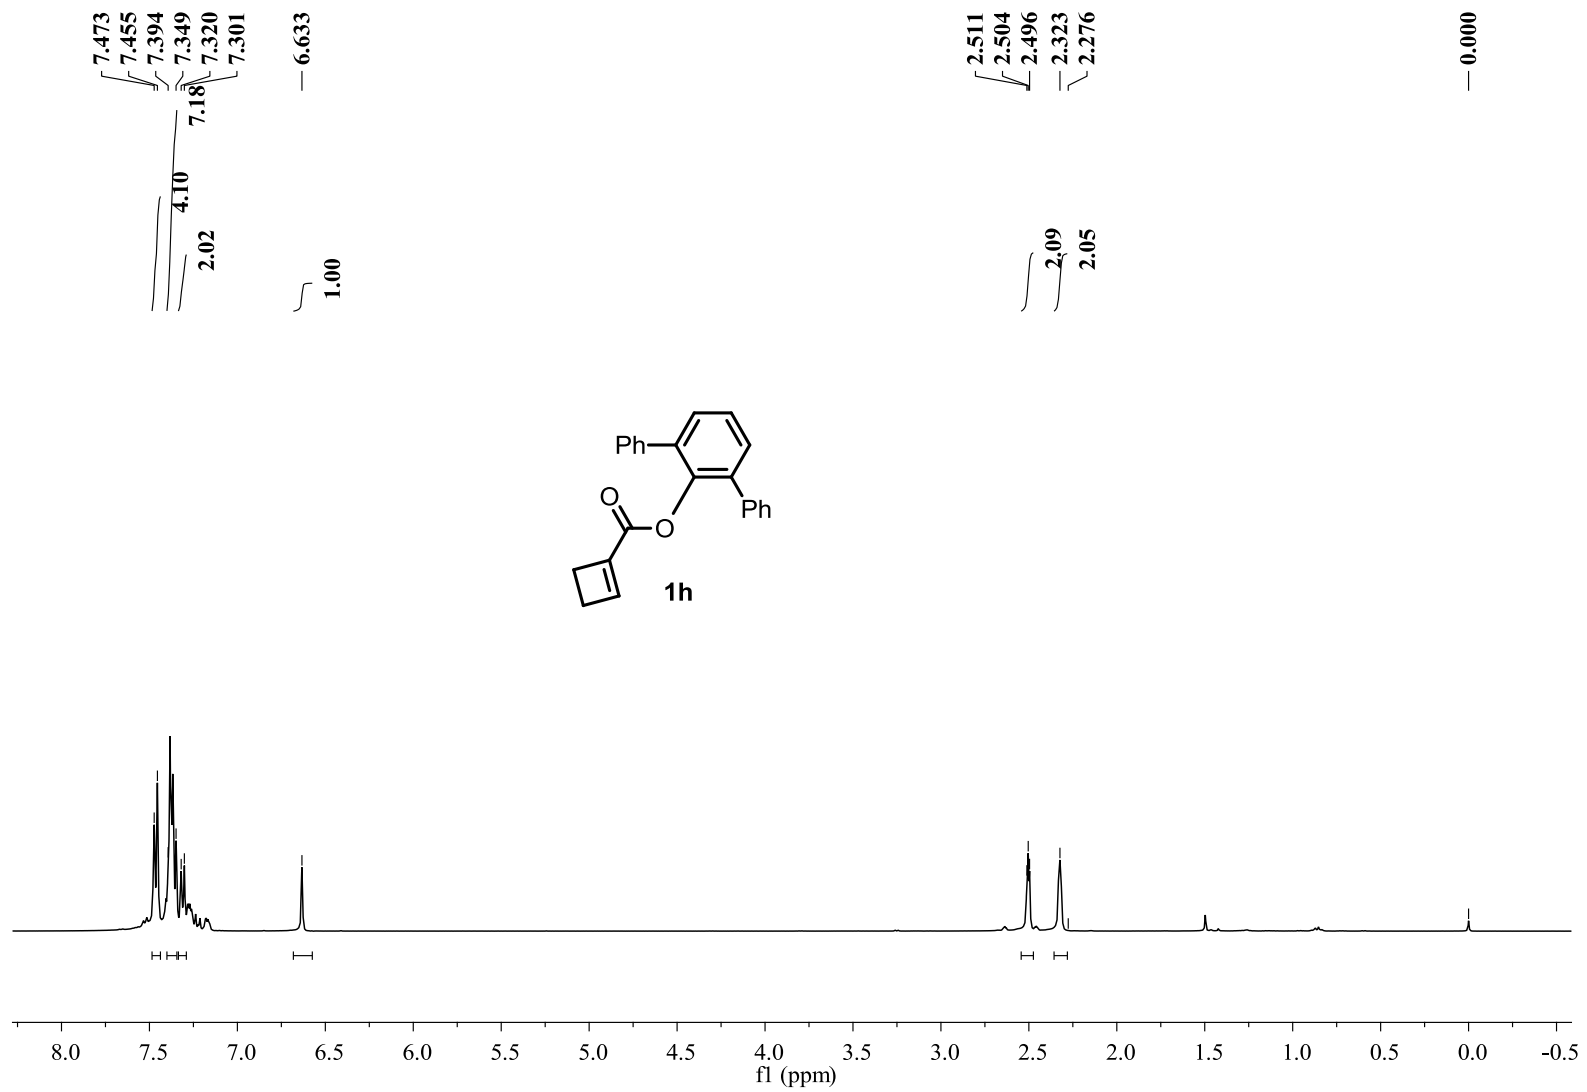

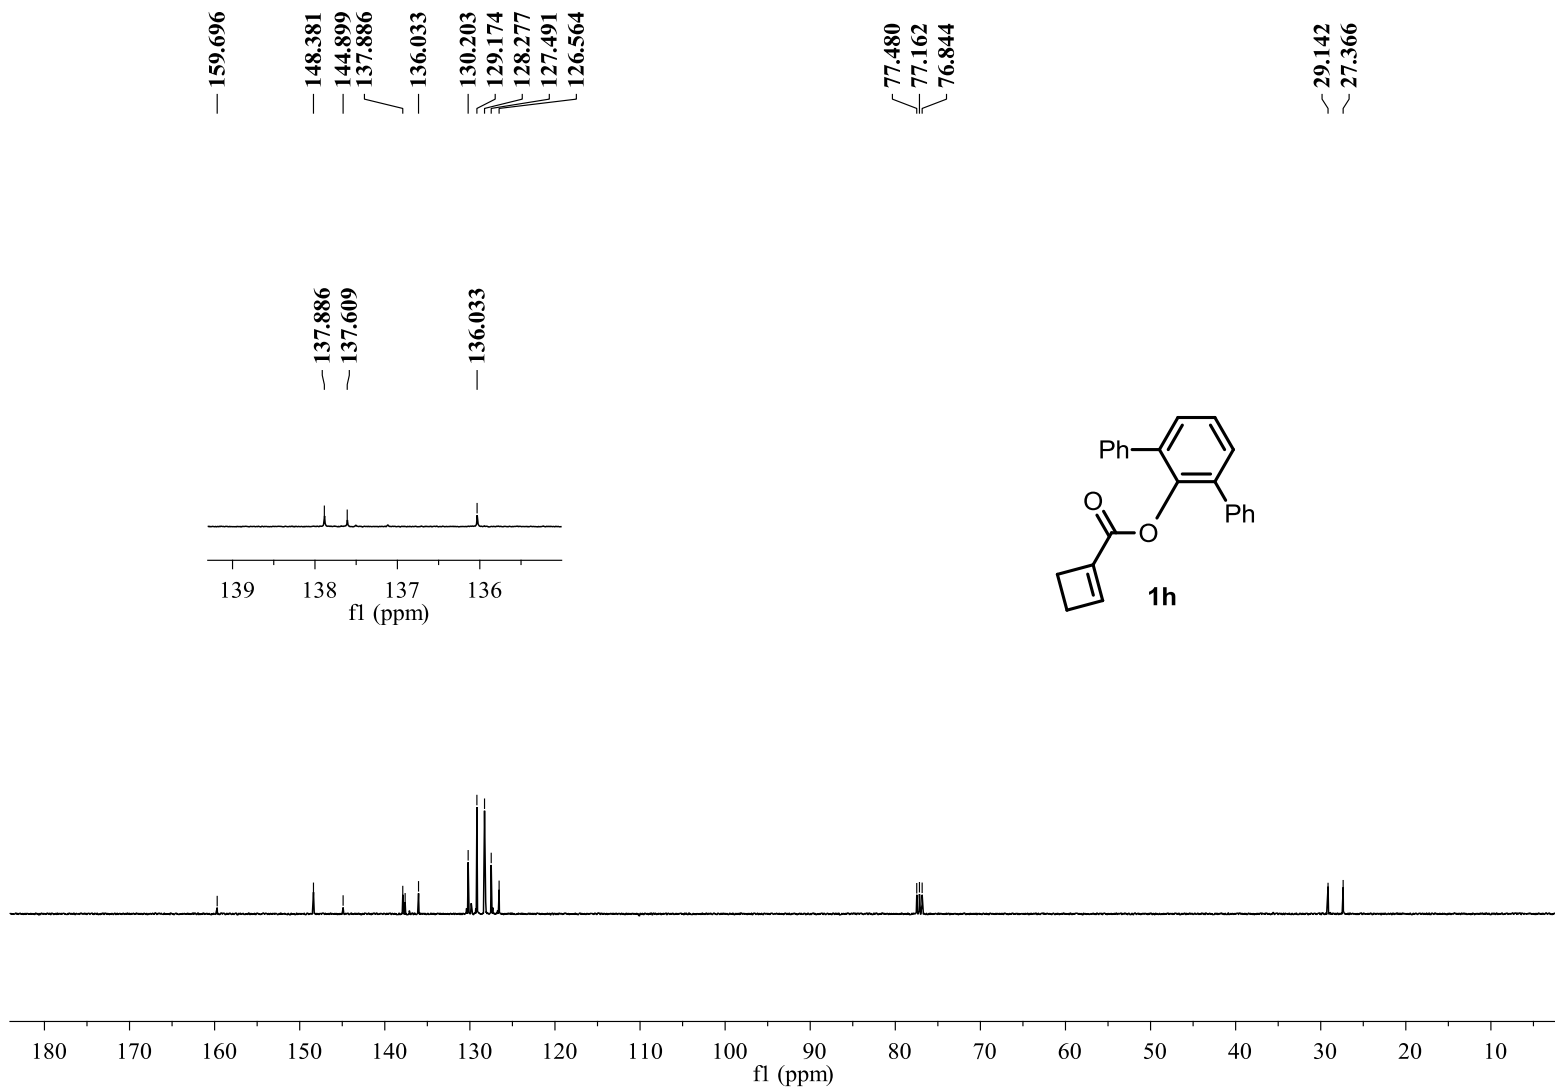

ffffff

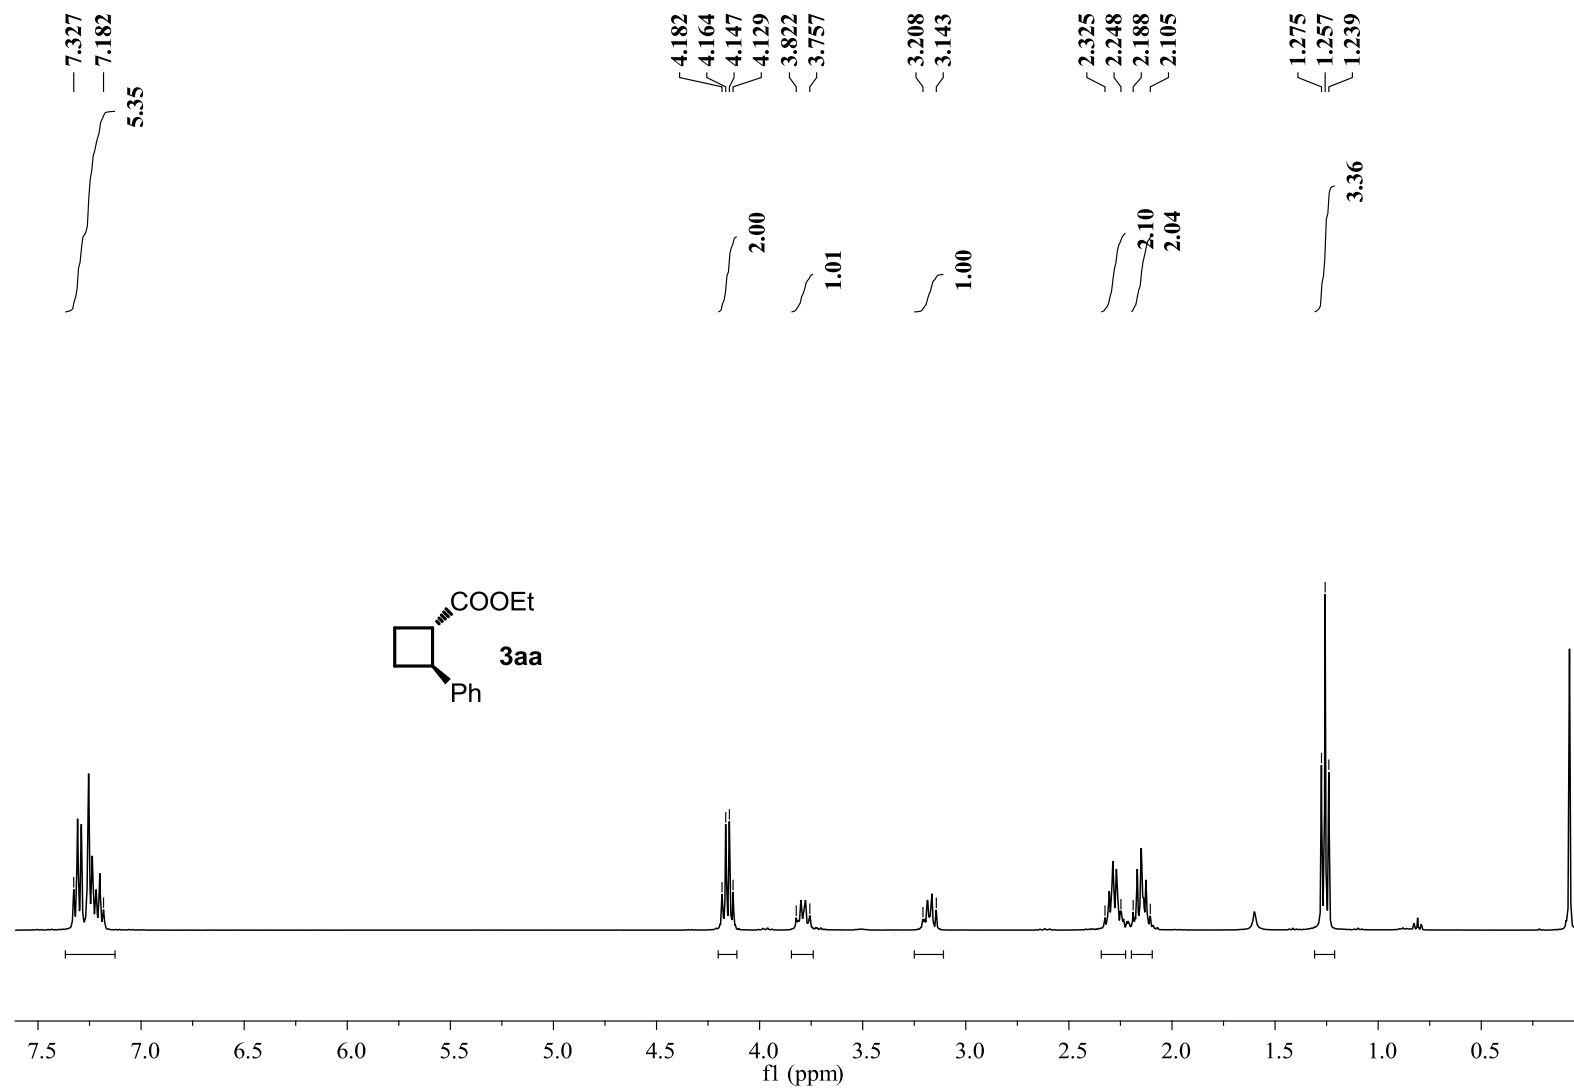

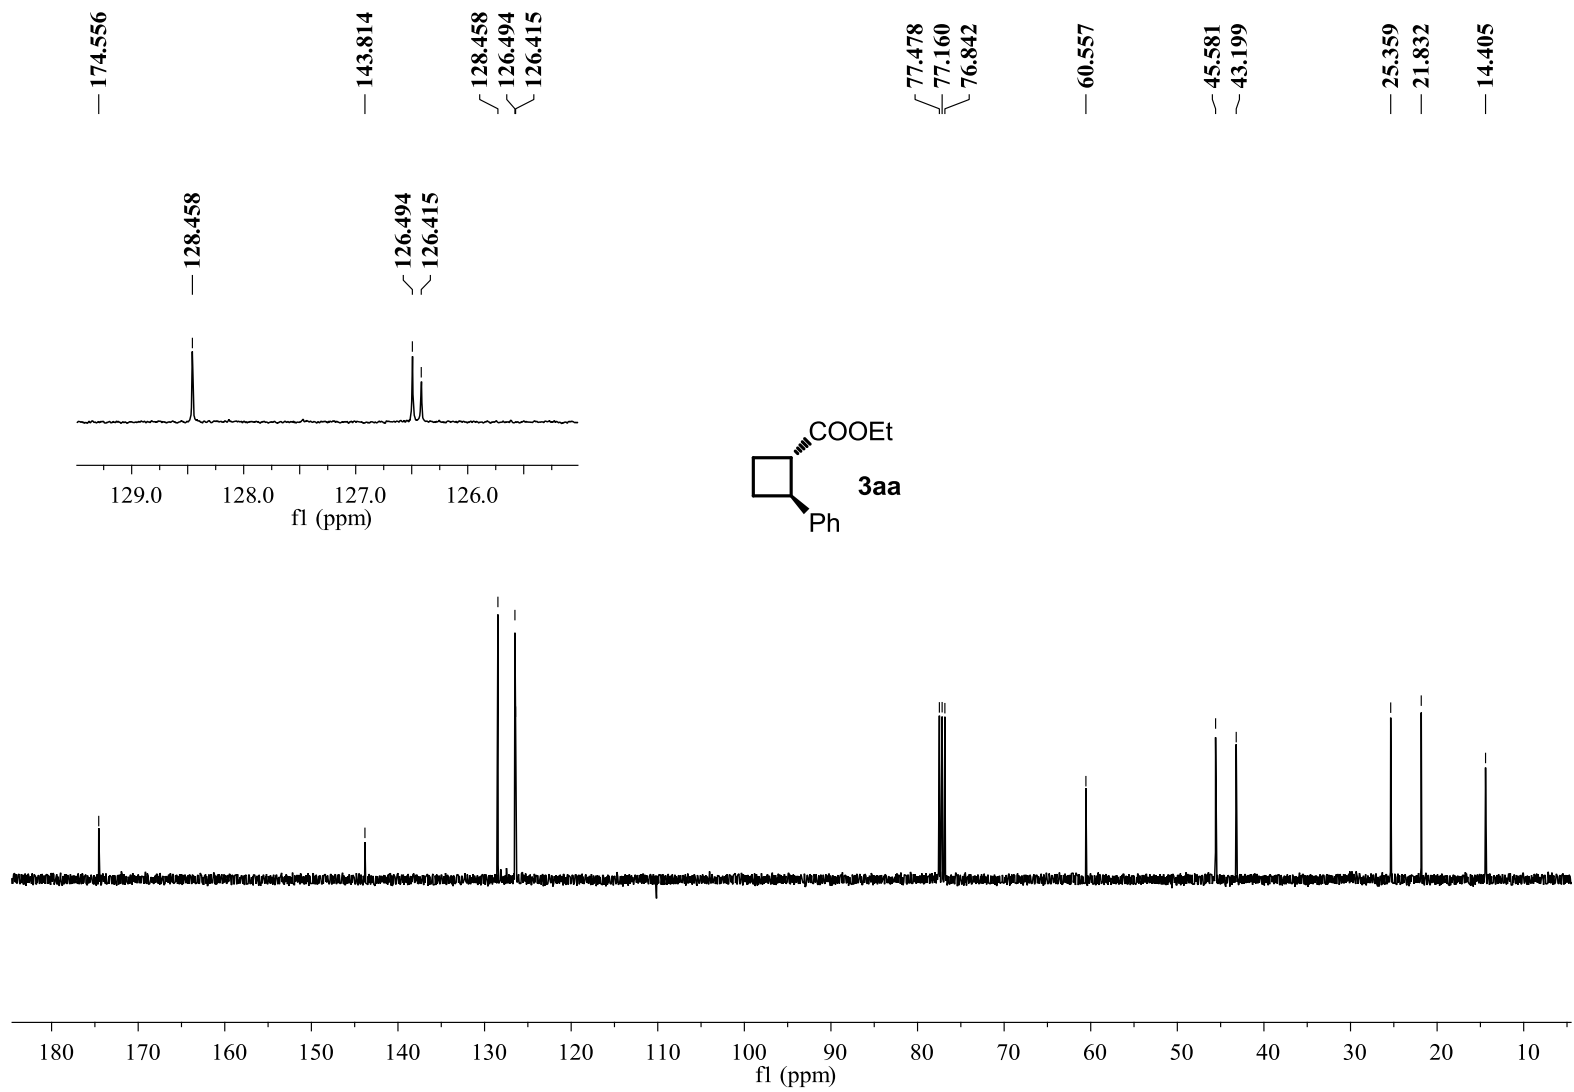

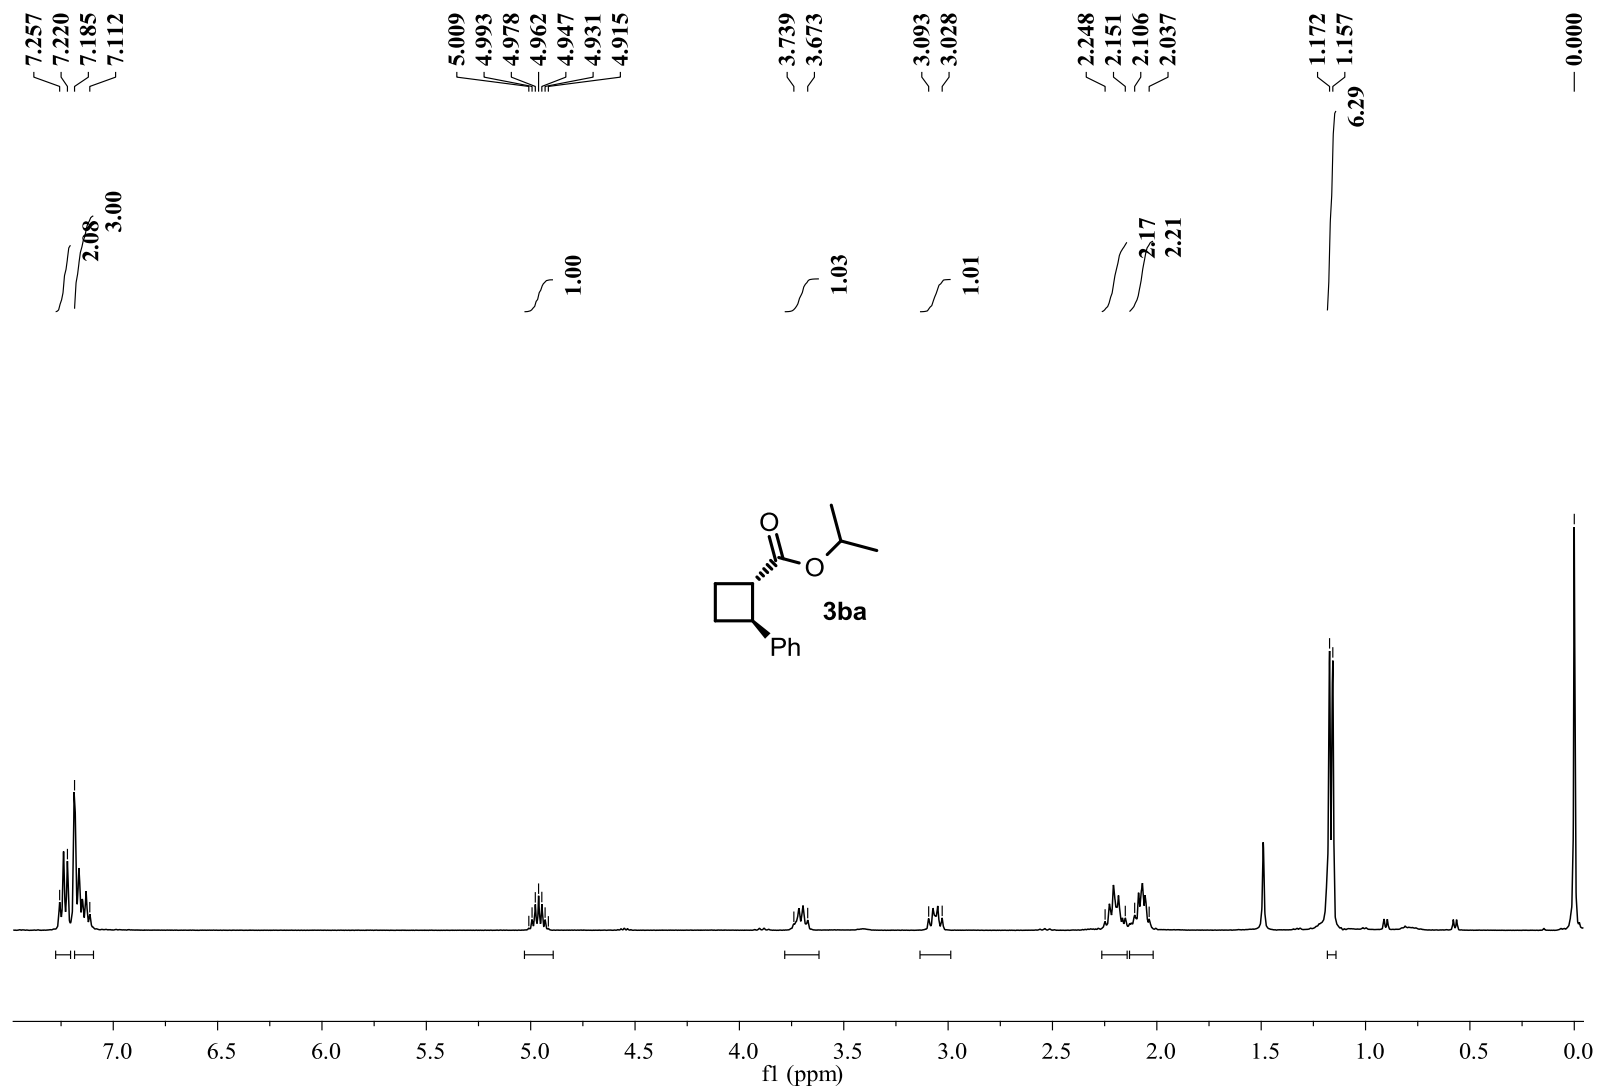

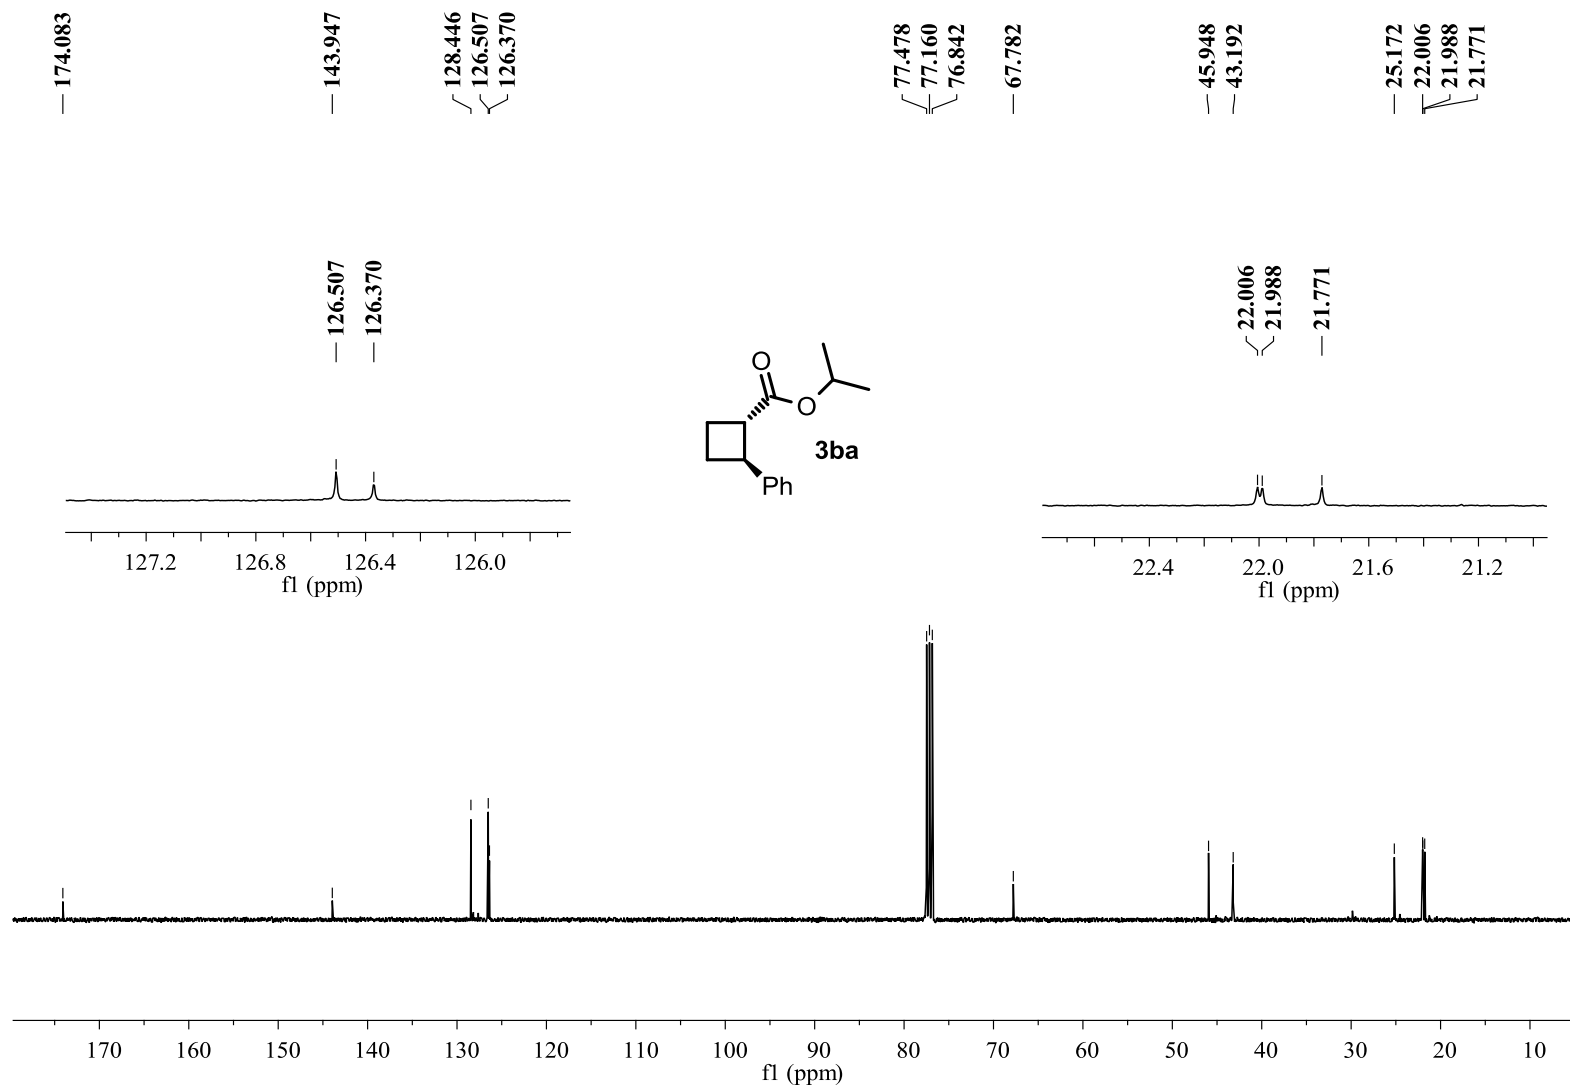



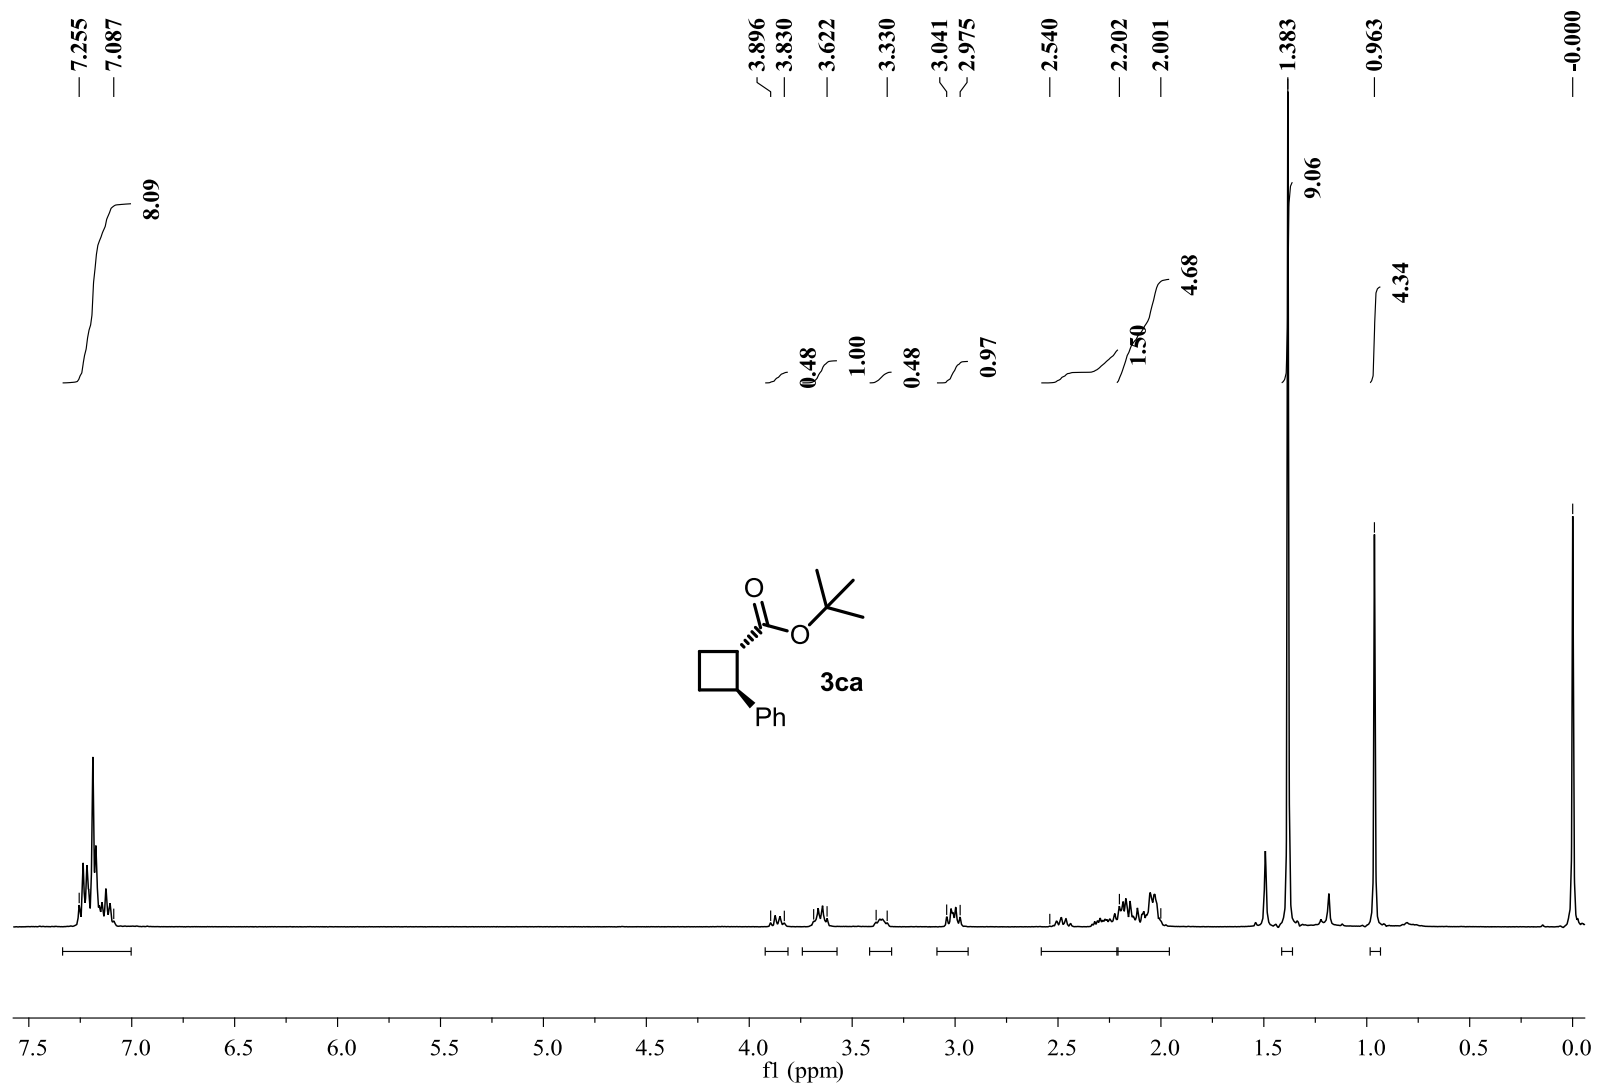

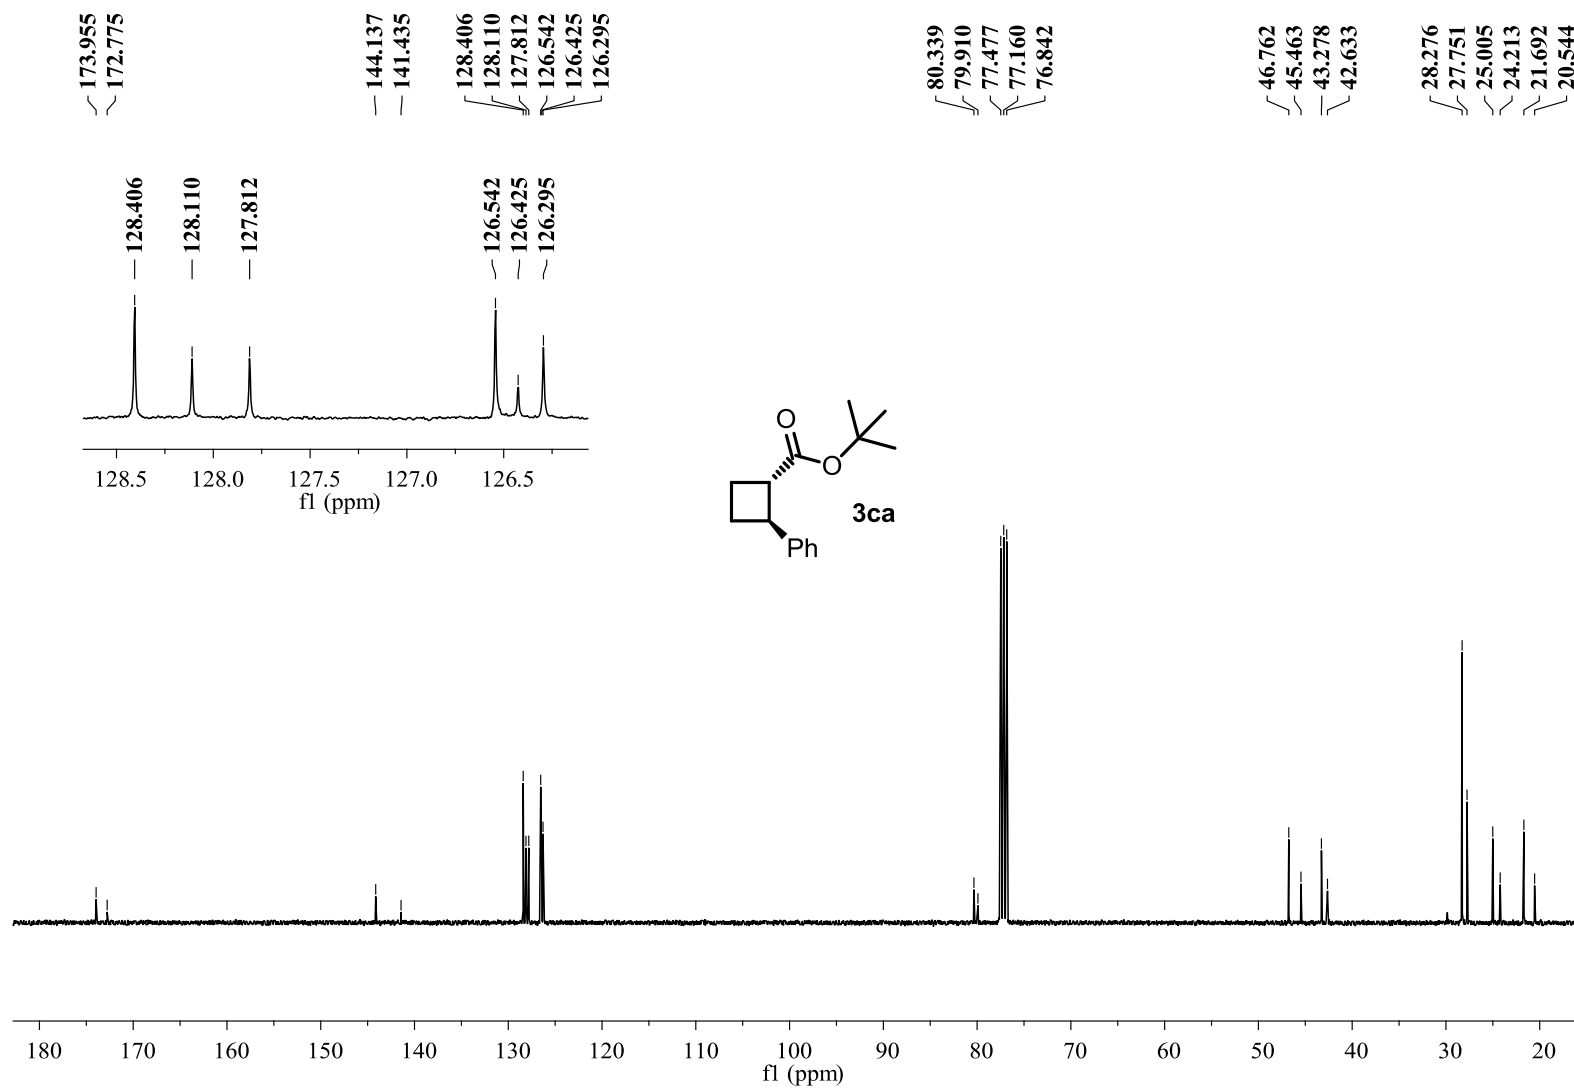

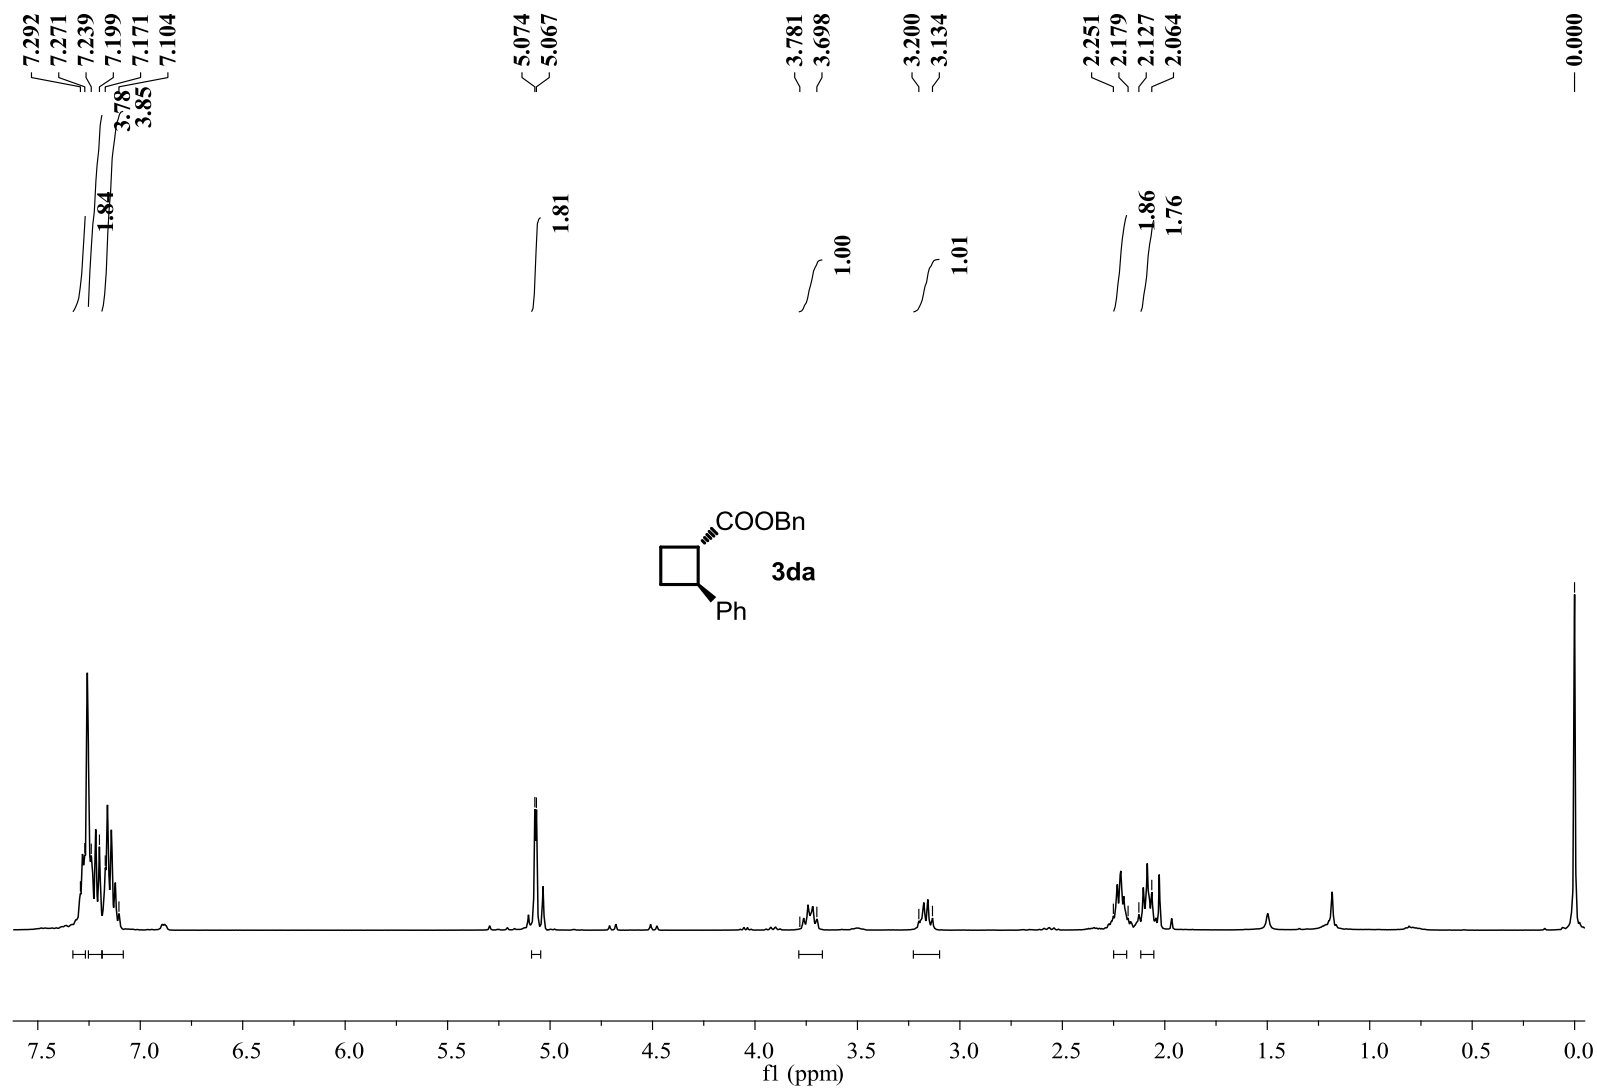

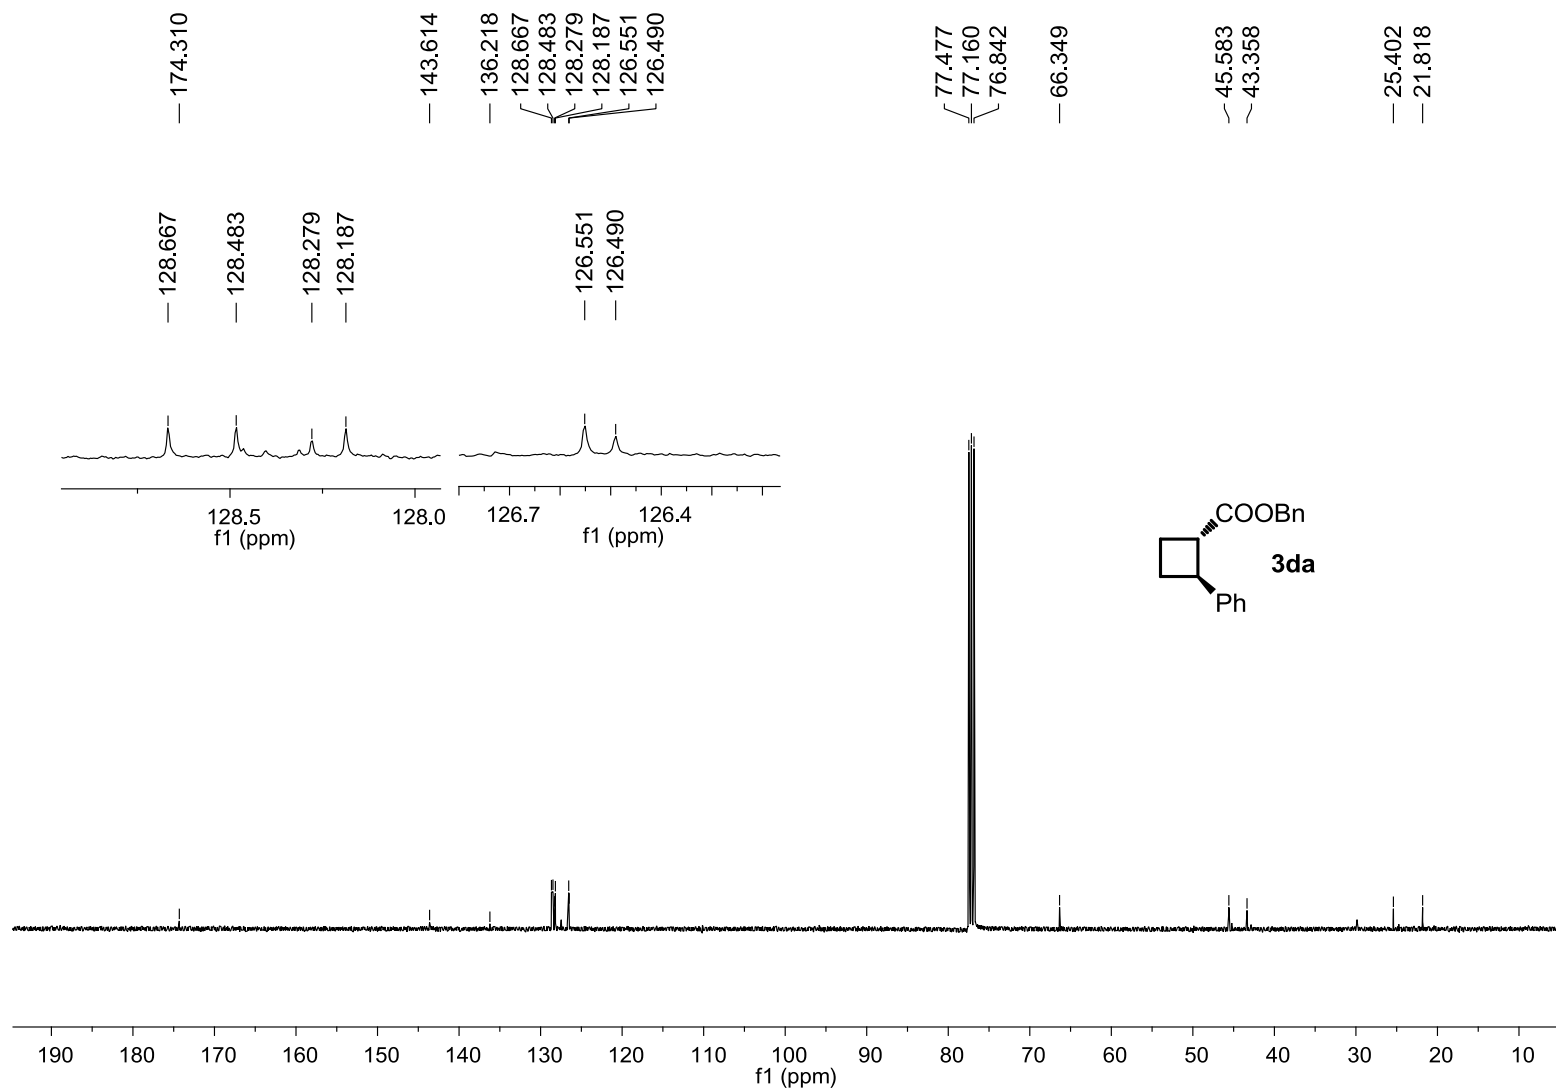

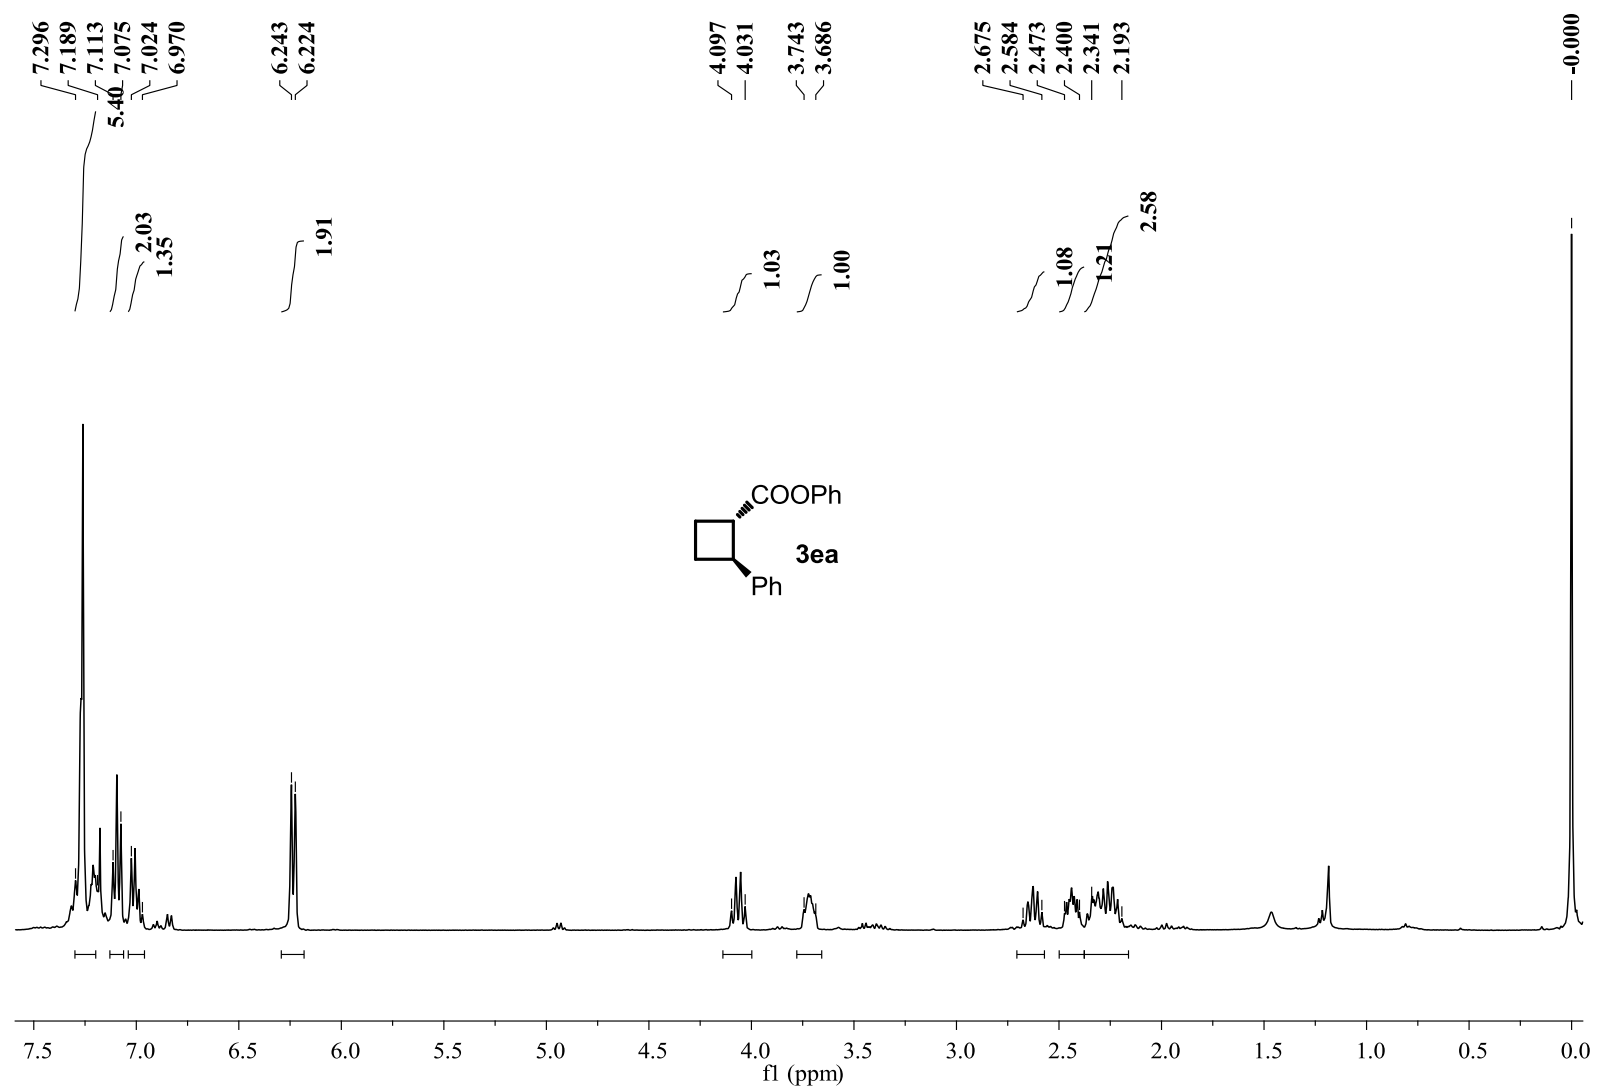

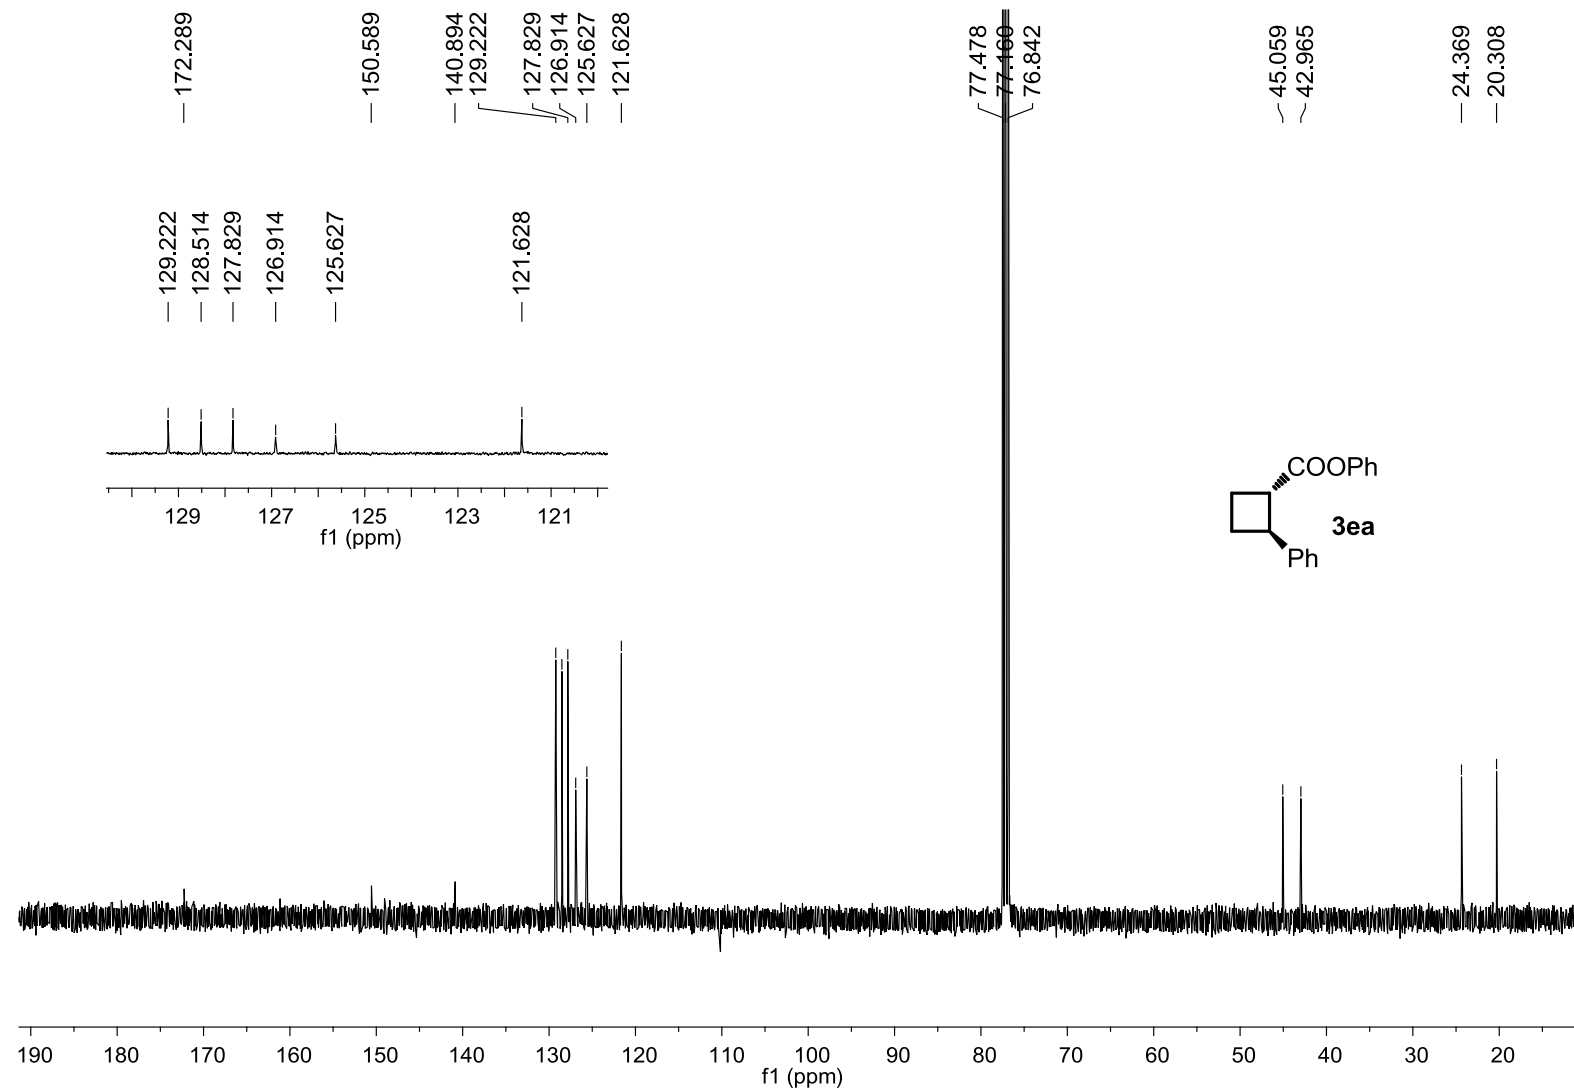

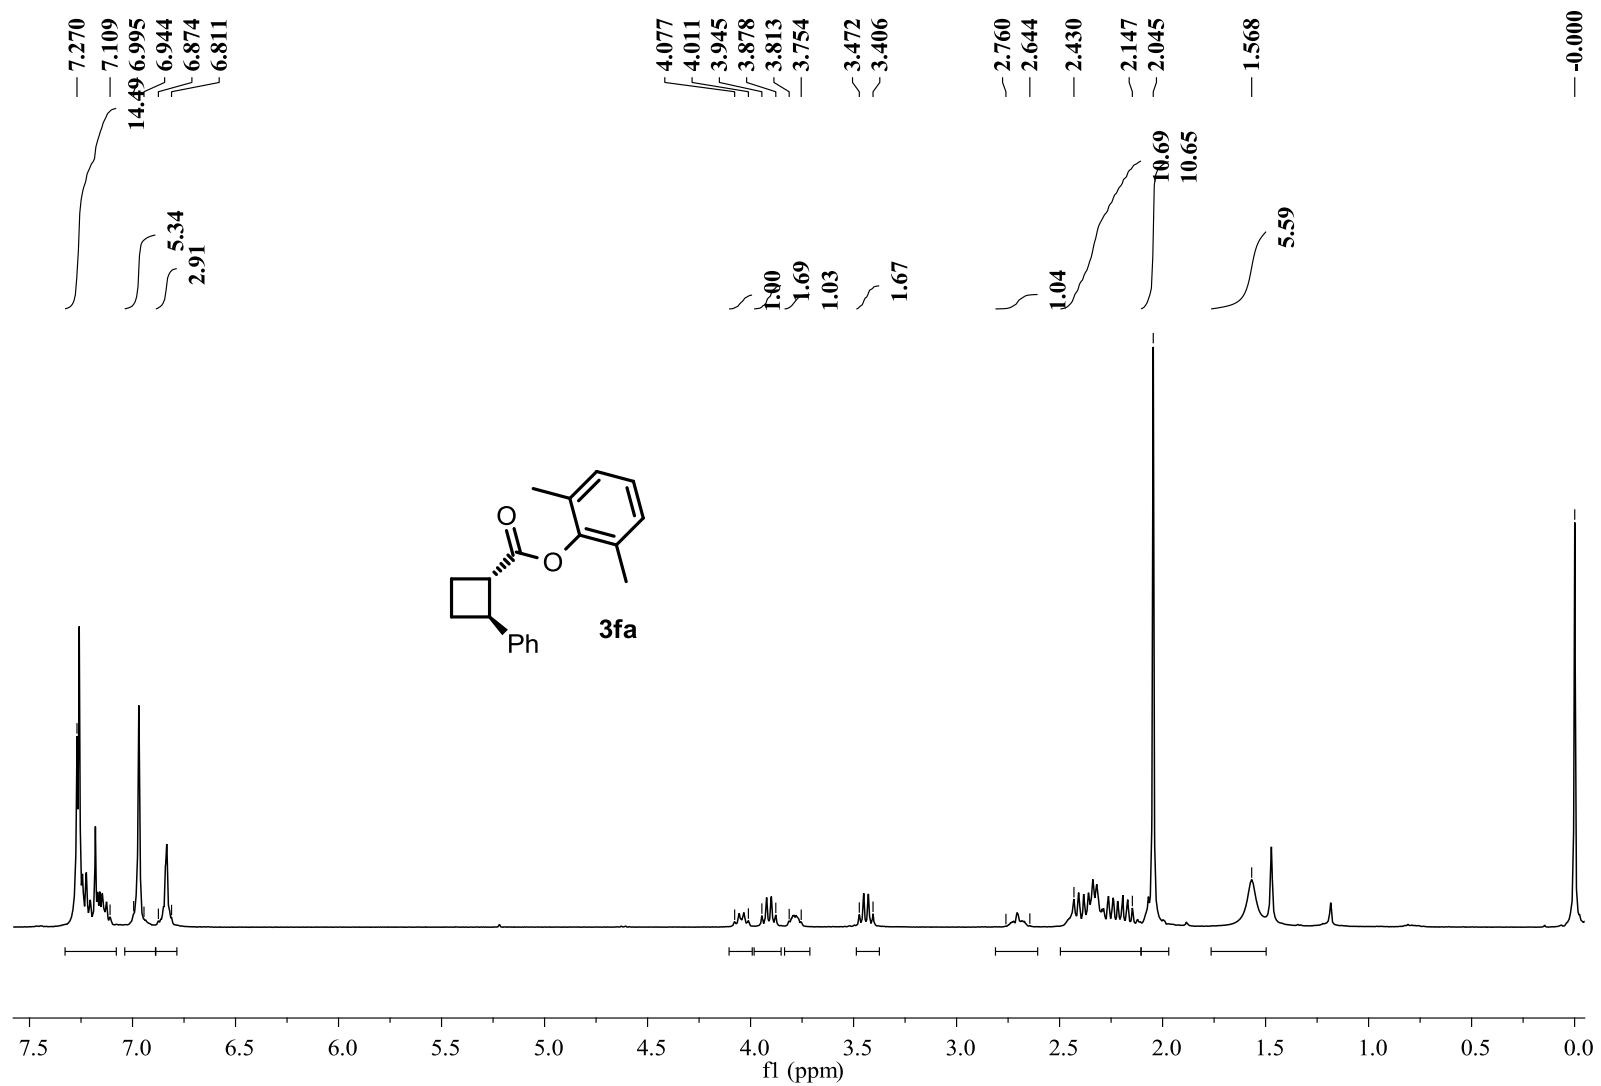

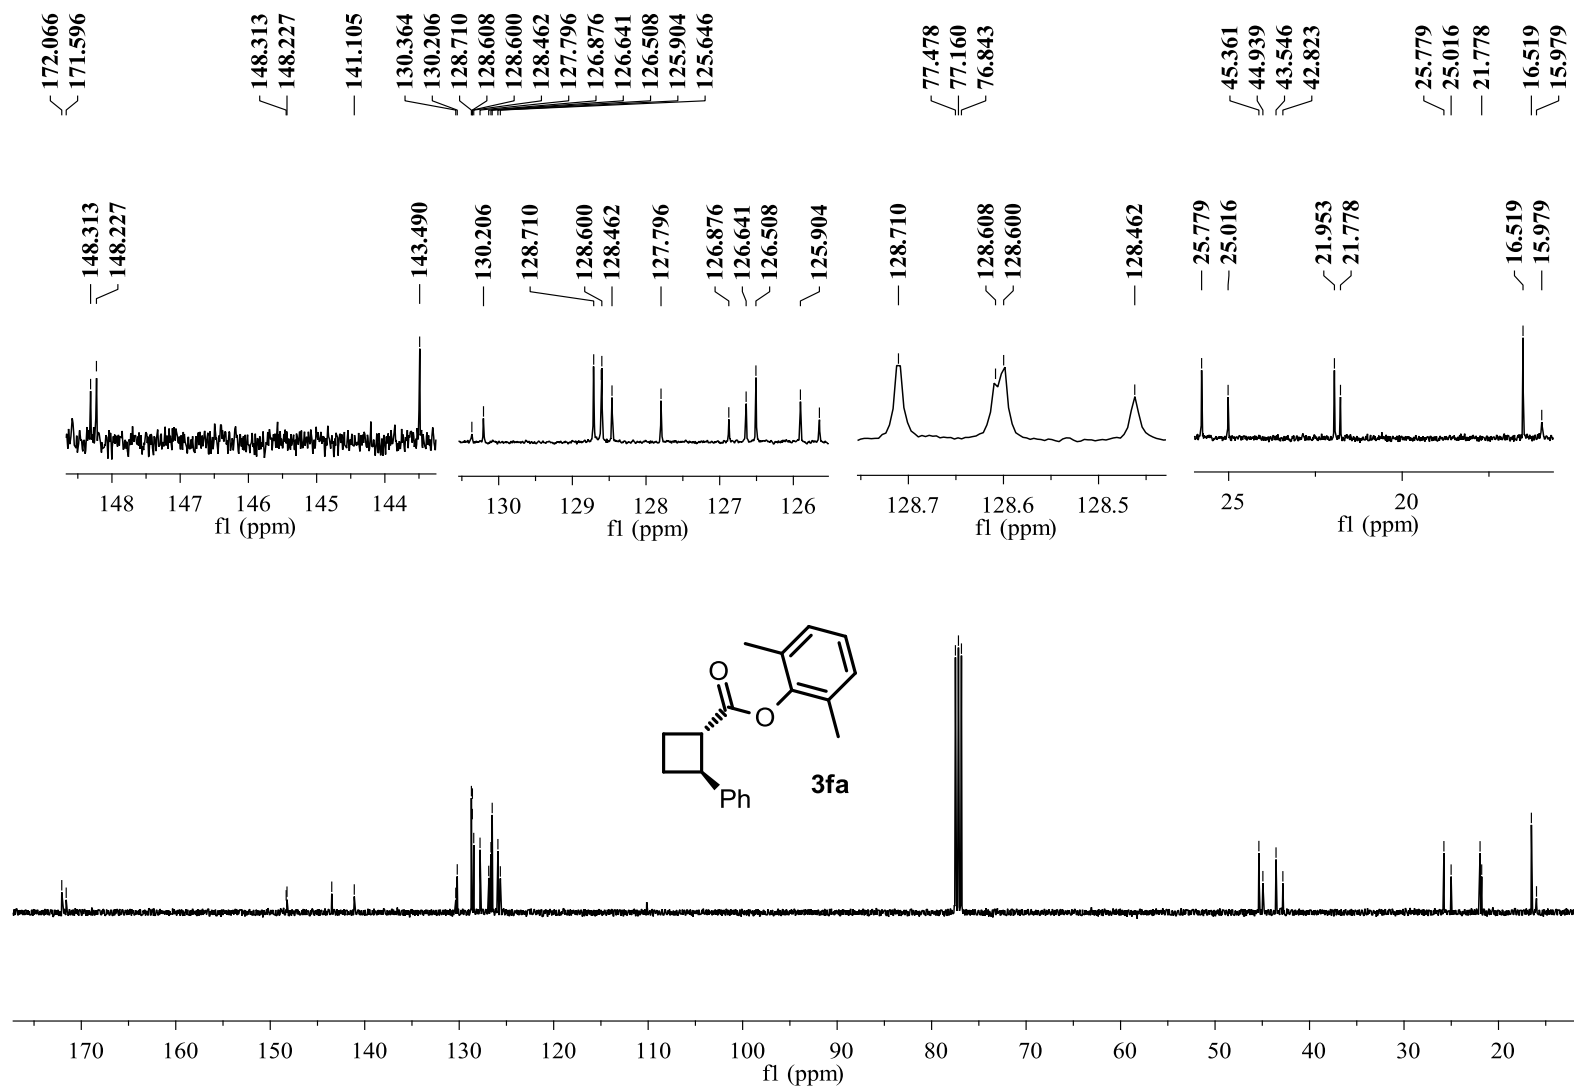



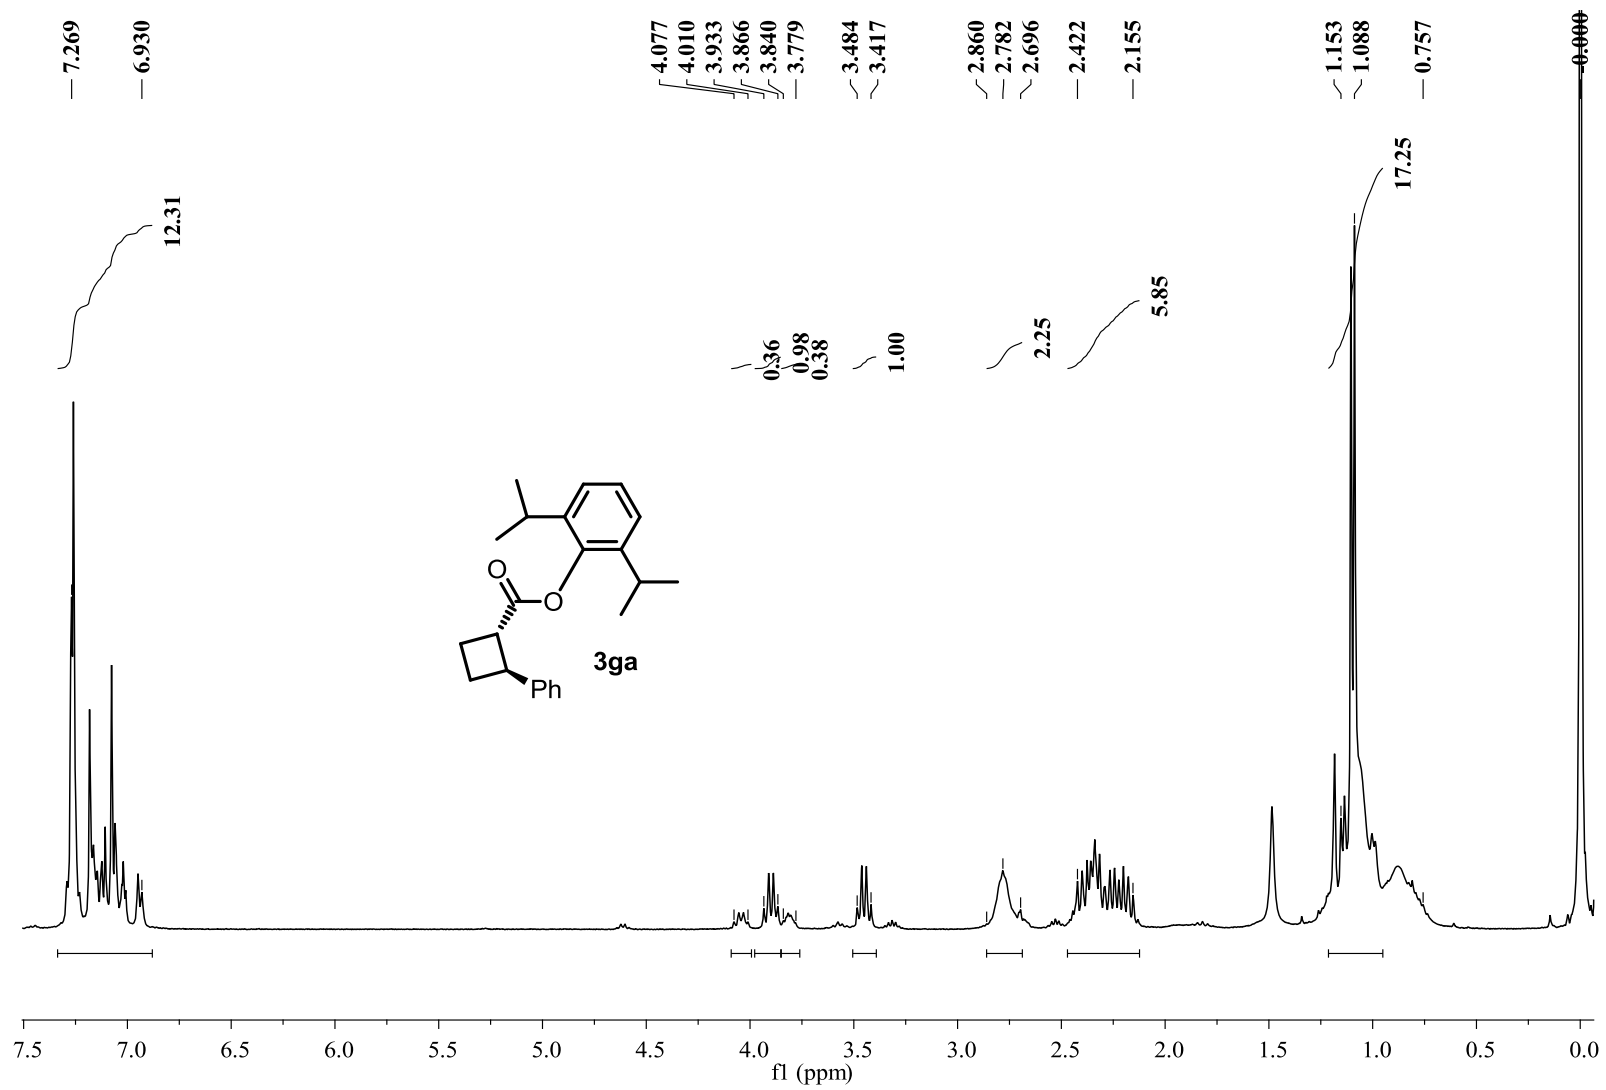

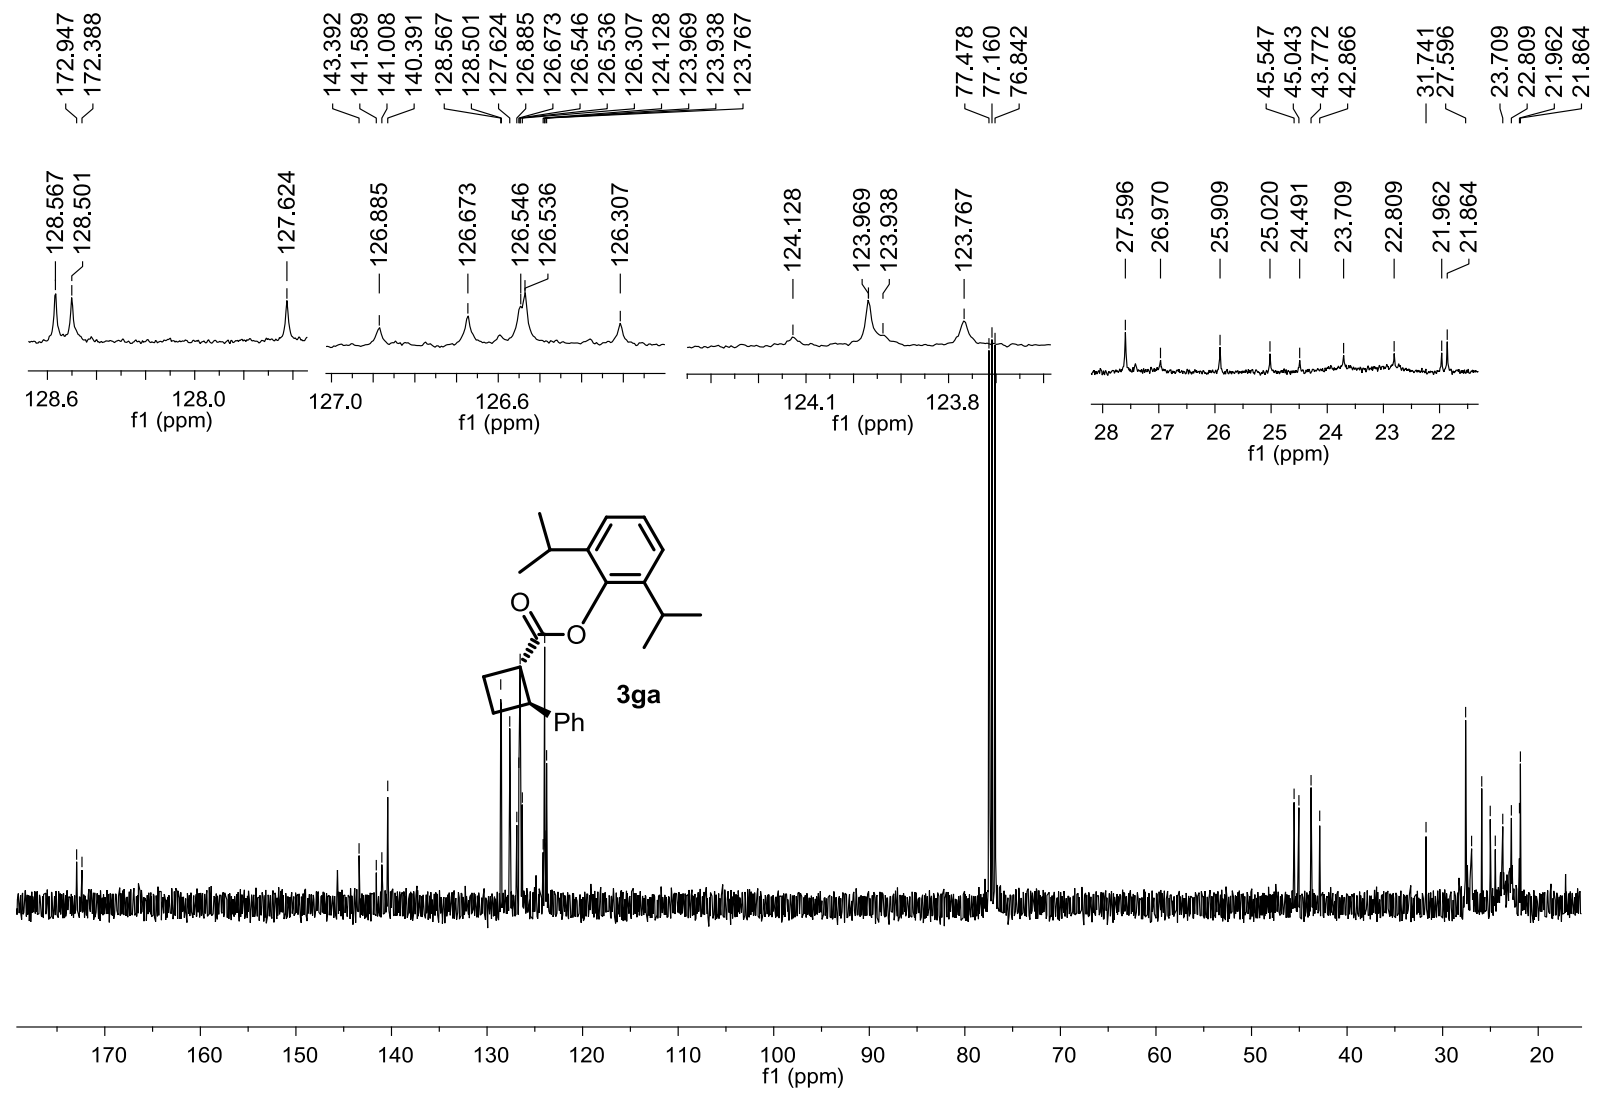

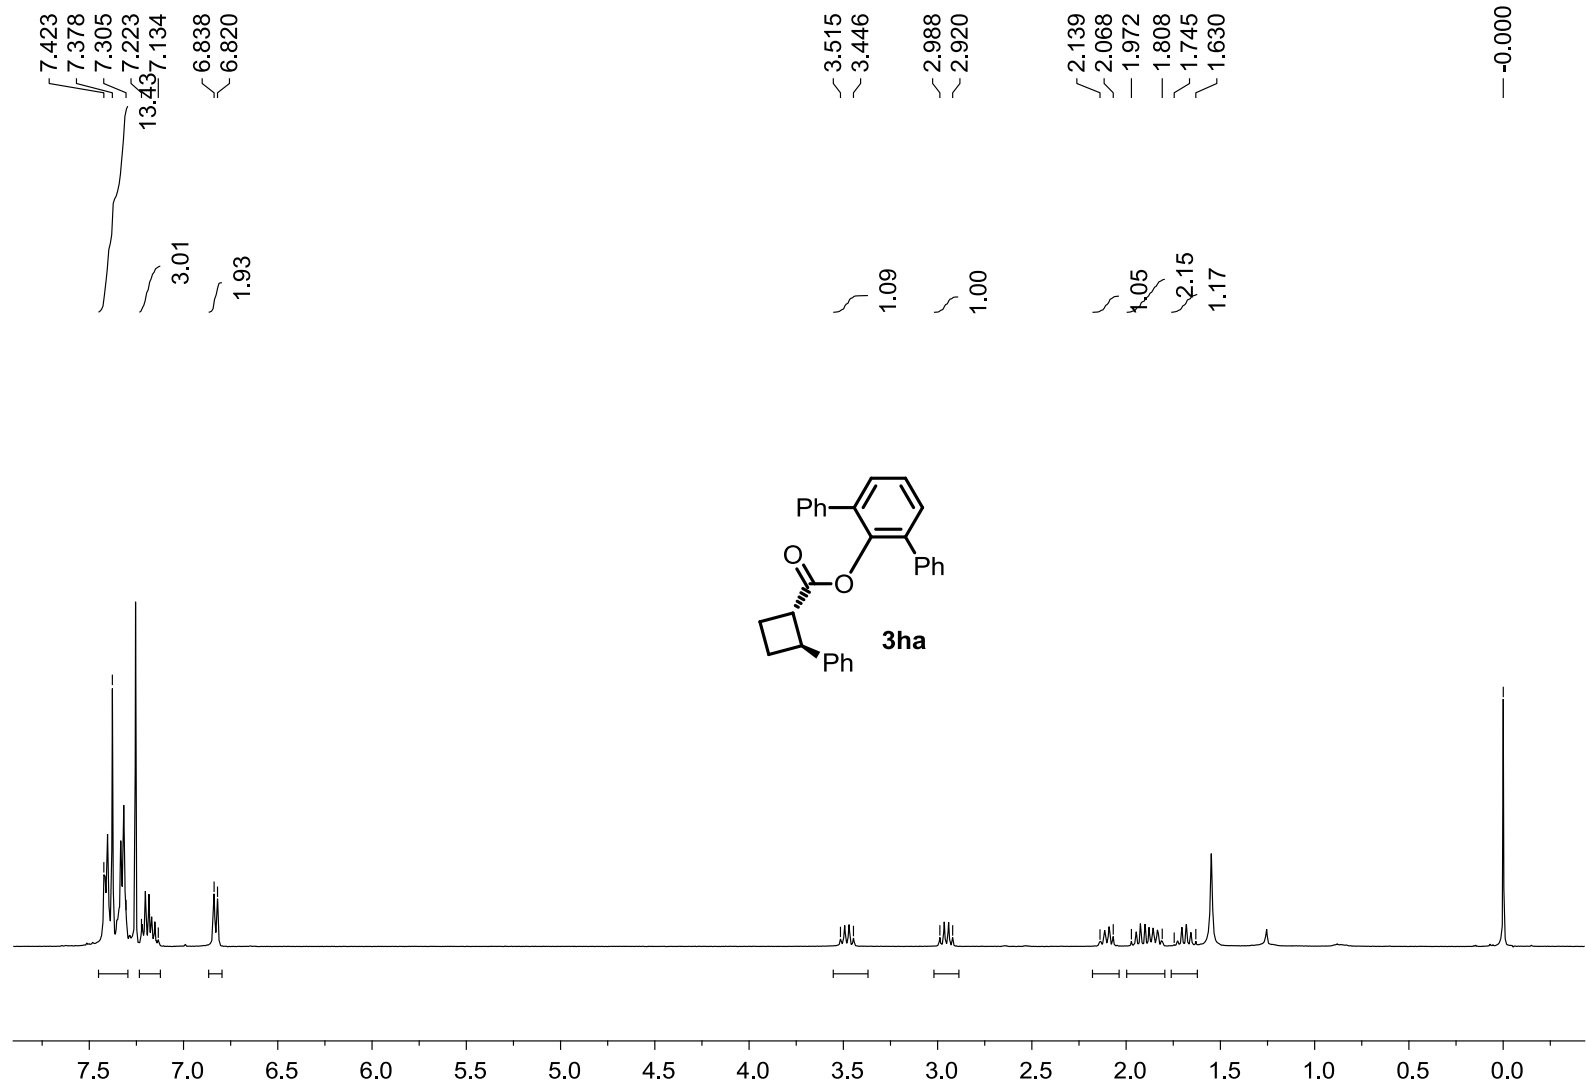

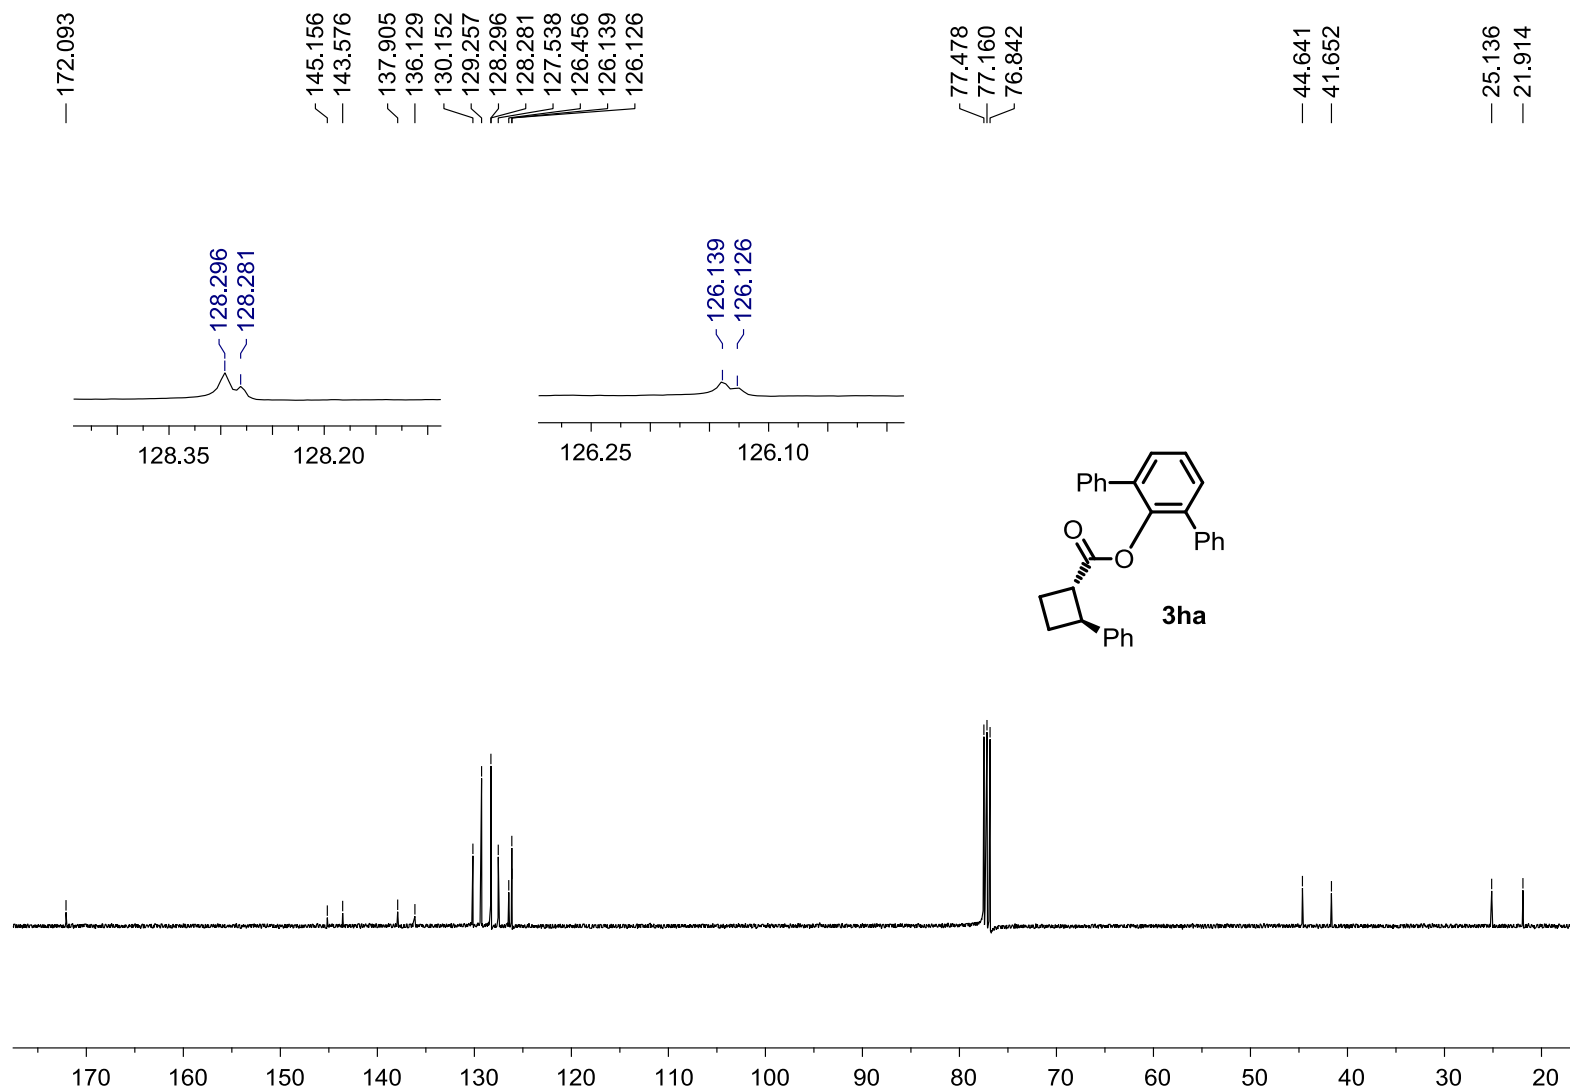

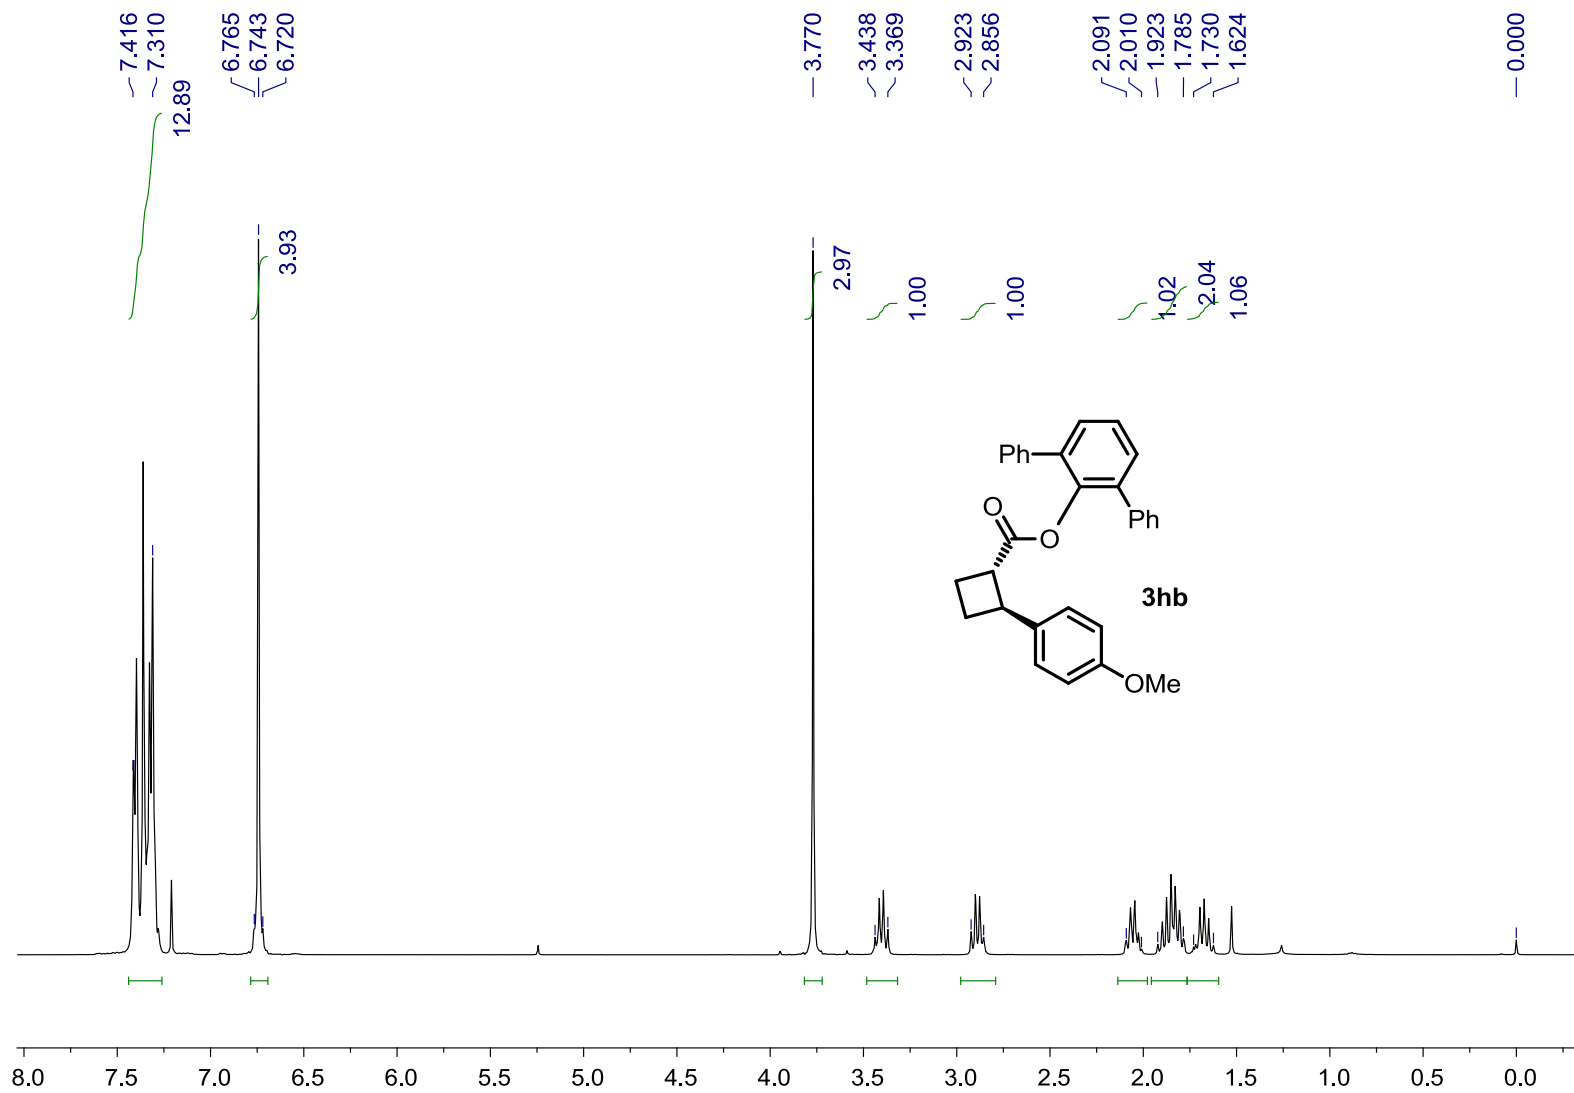

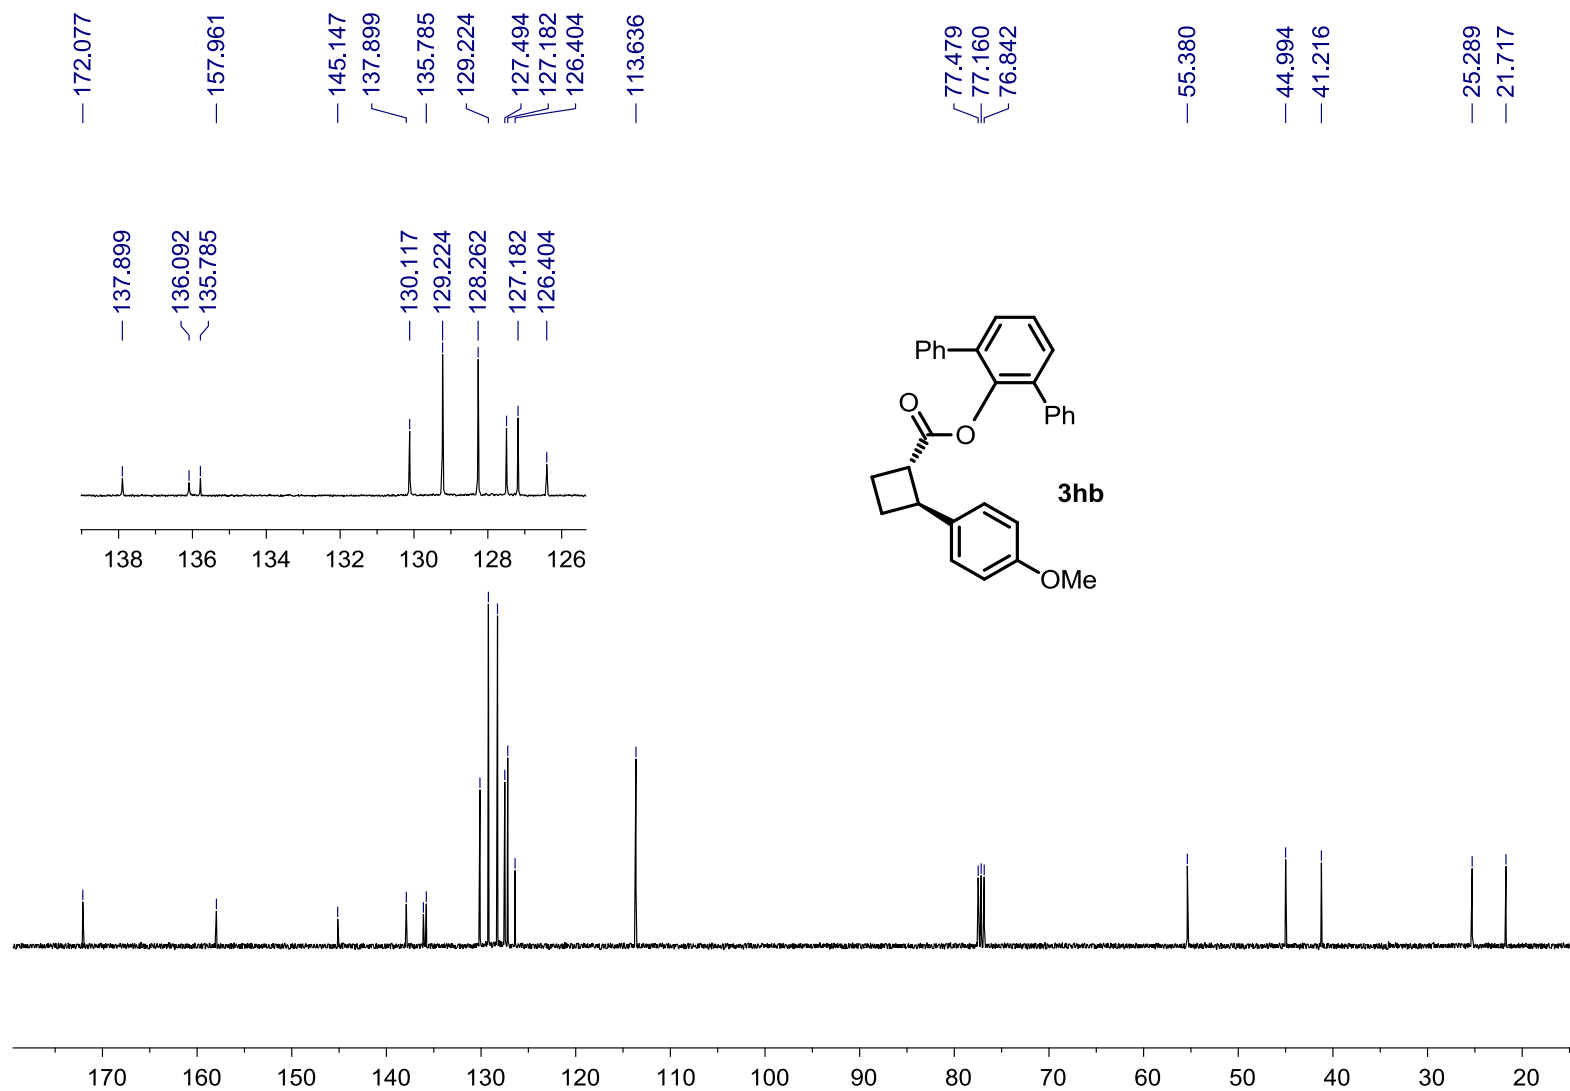

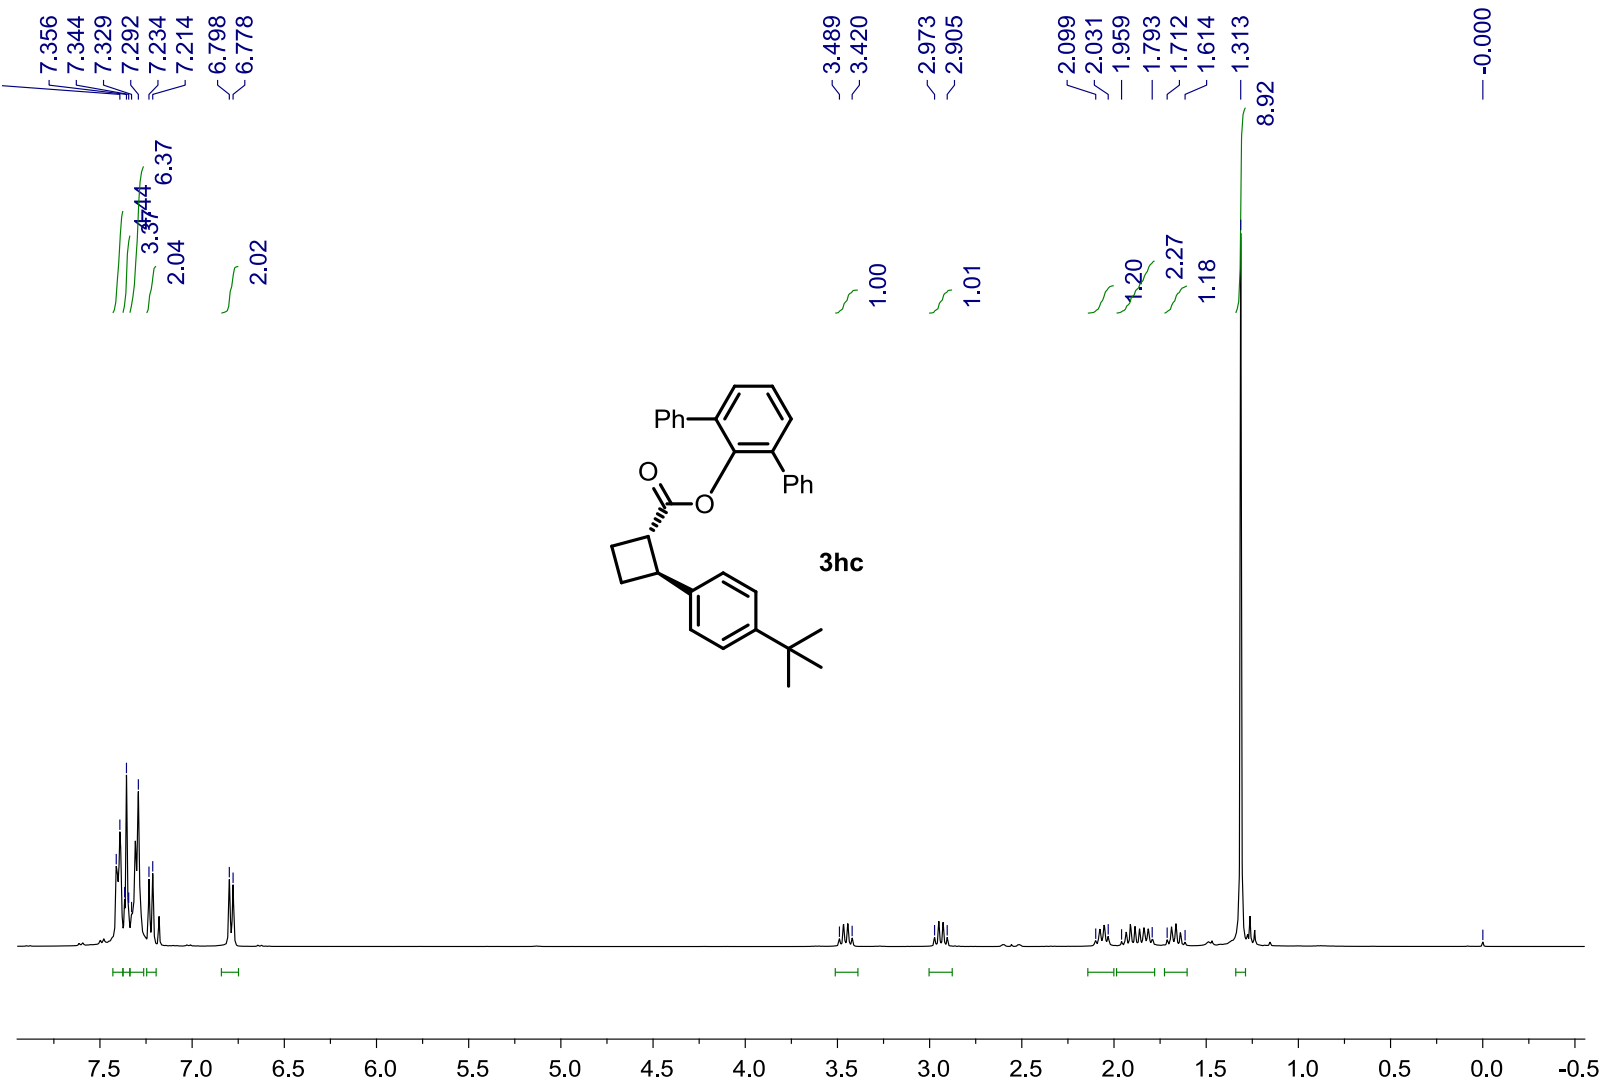

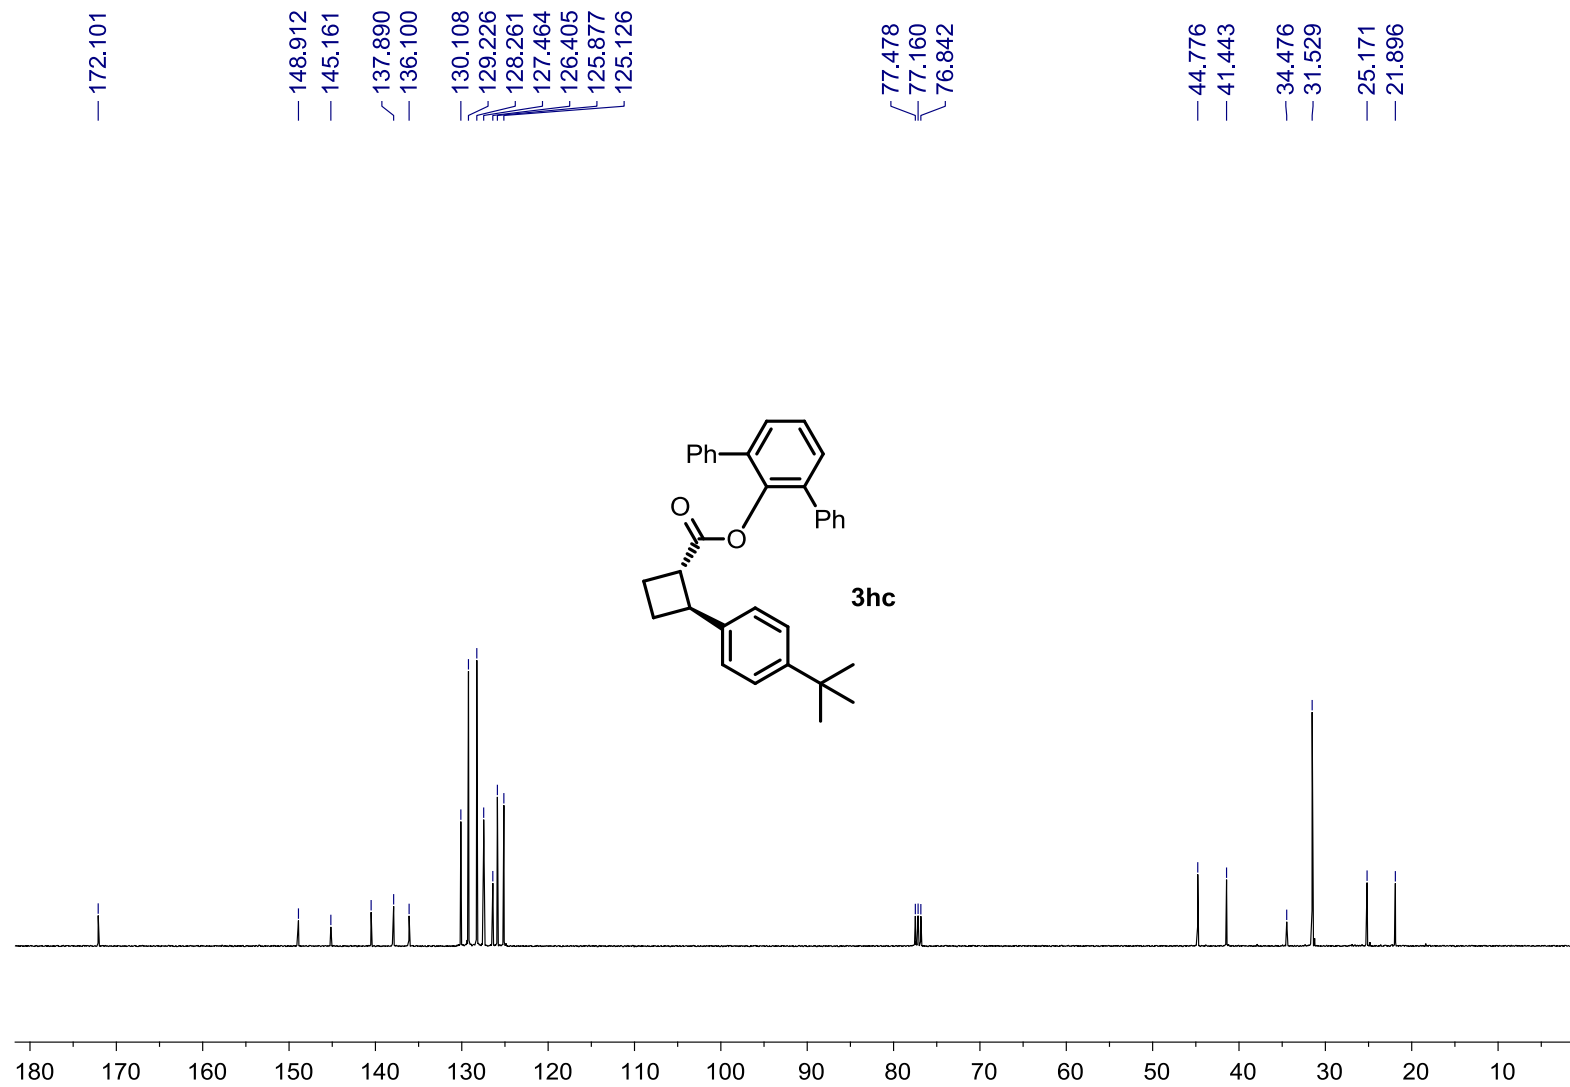



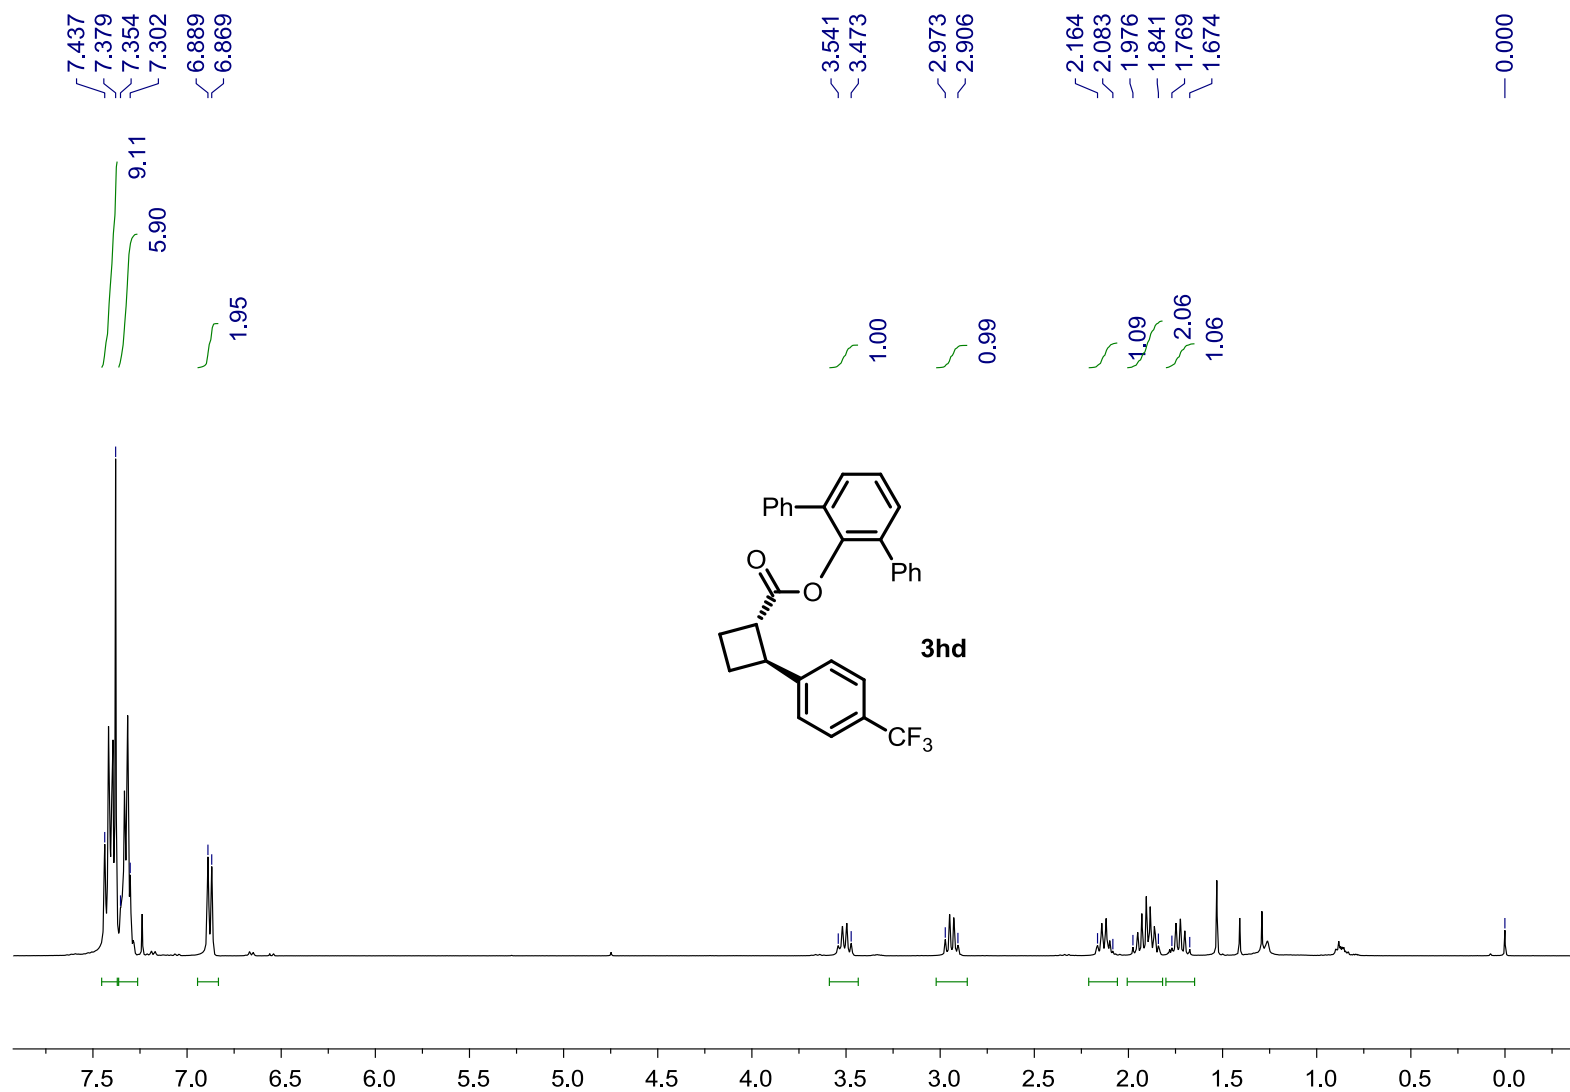

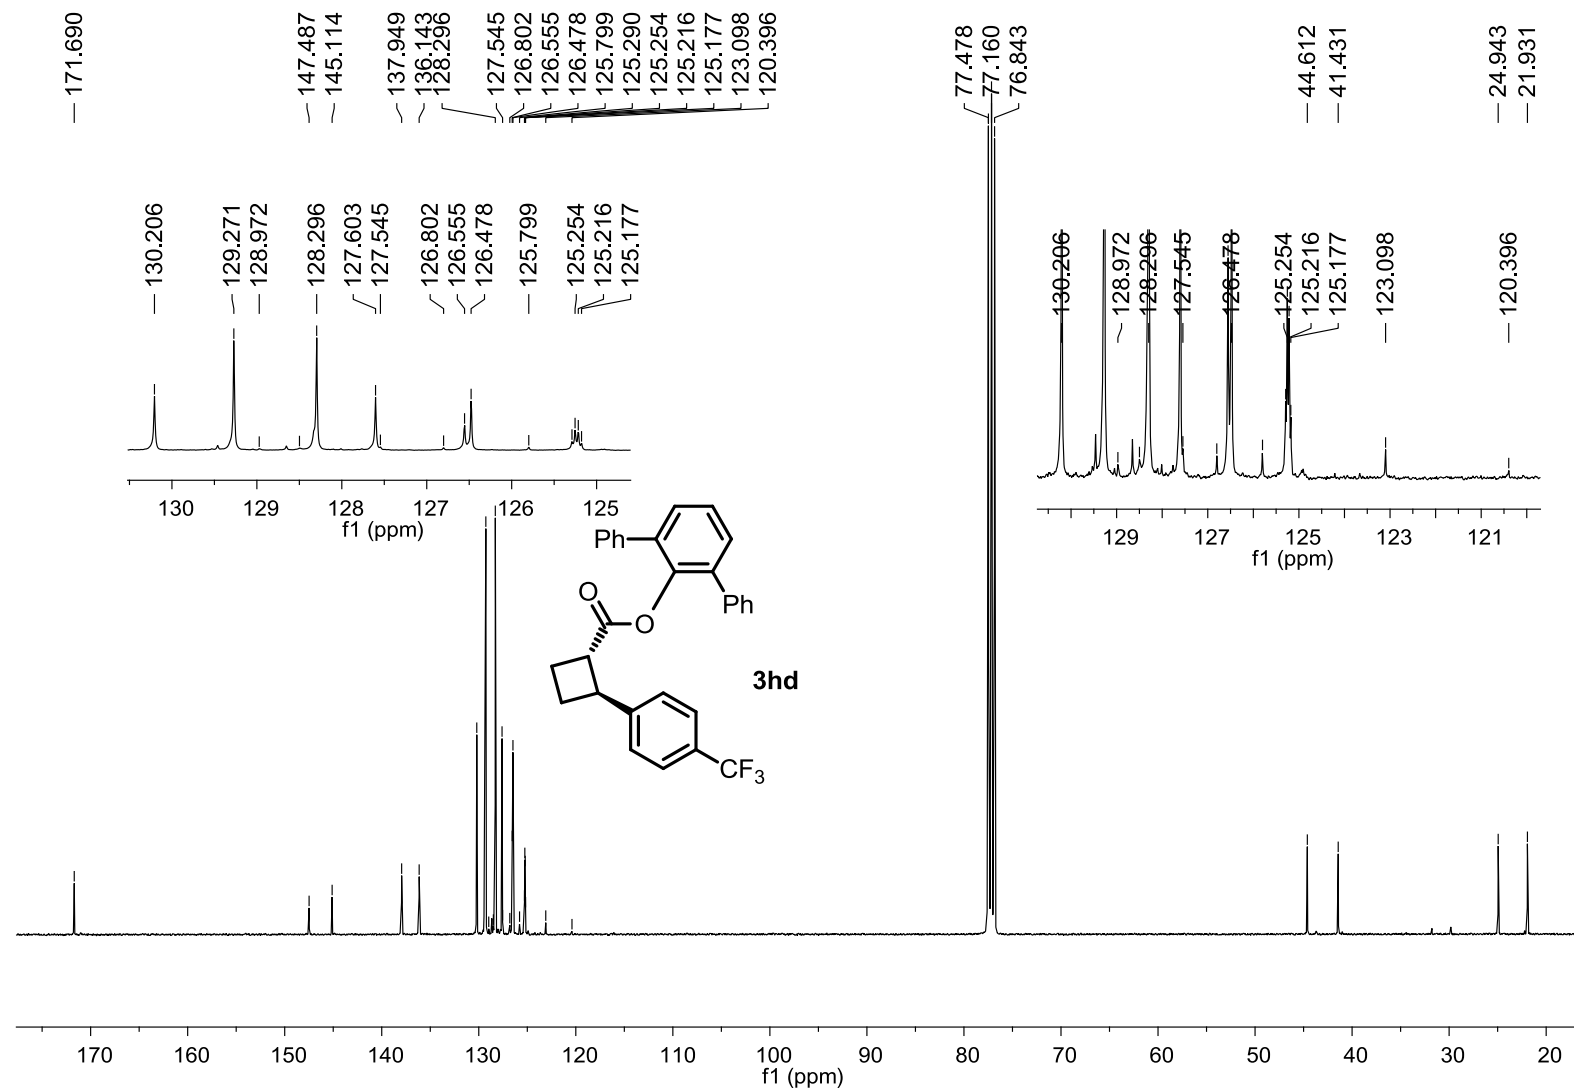

-62.338

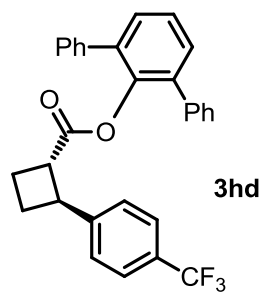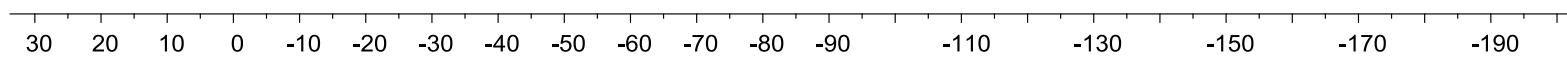

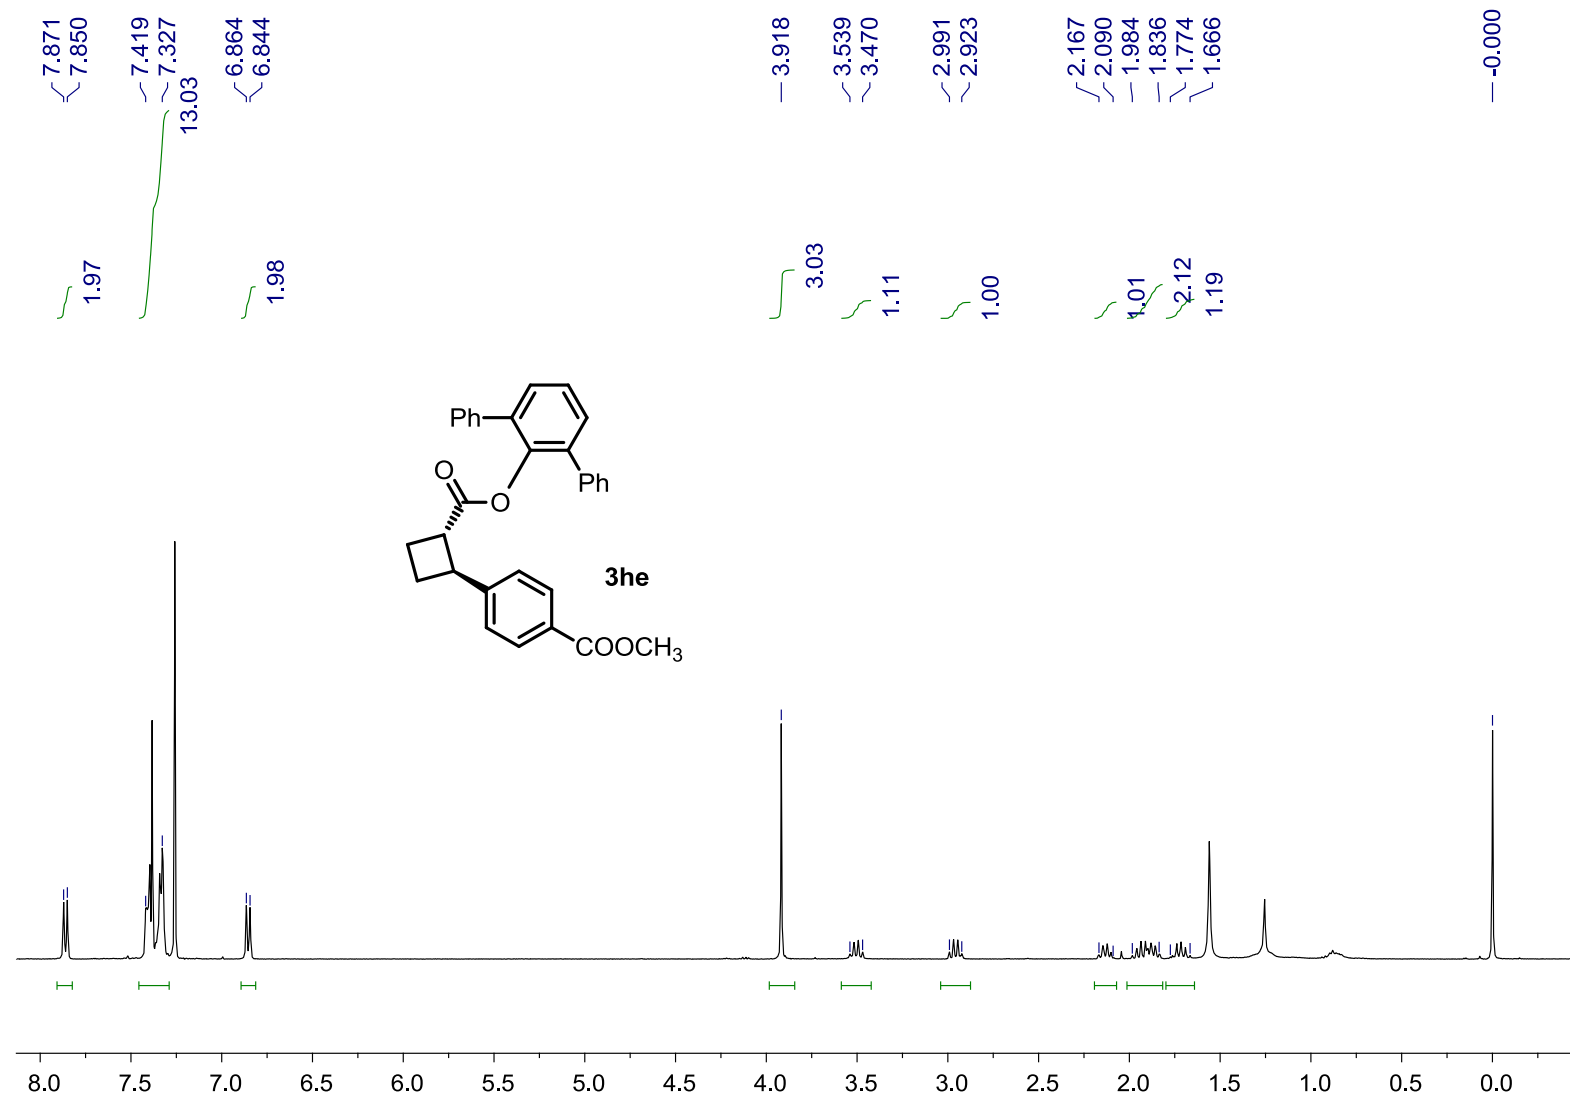

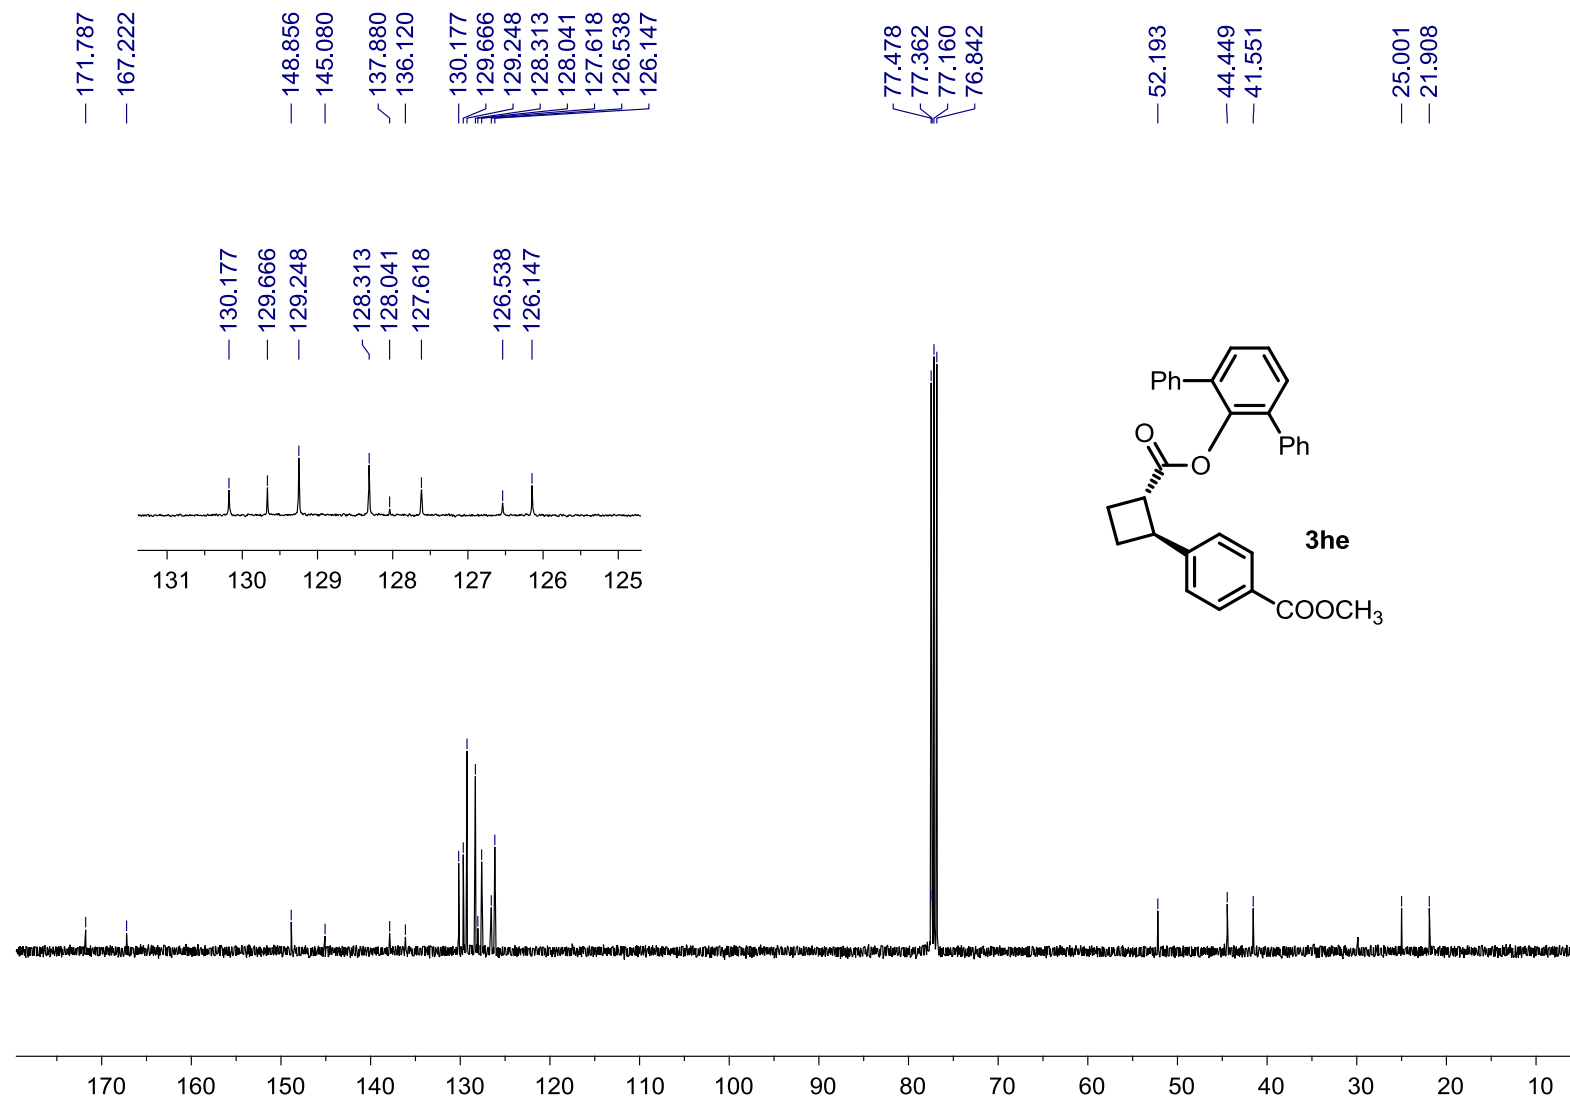

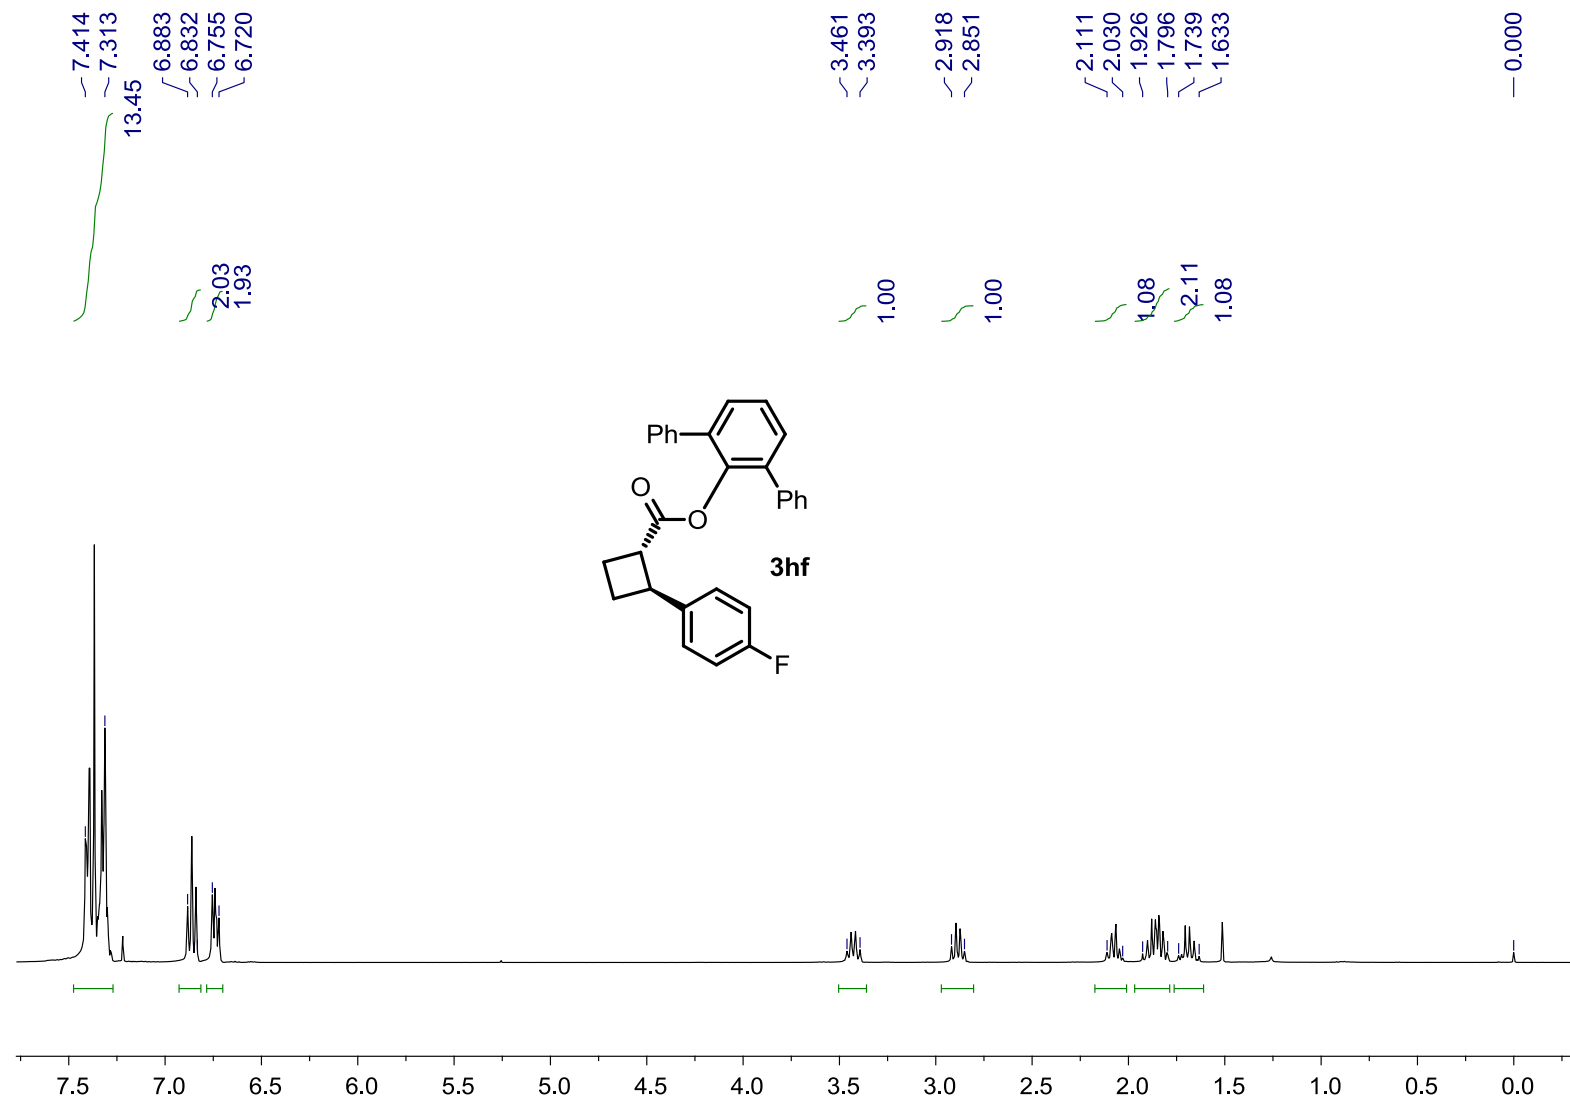



— -117.186

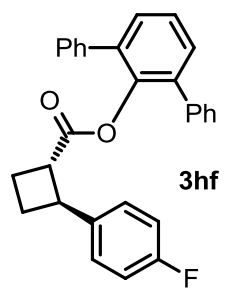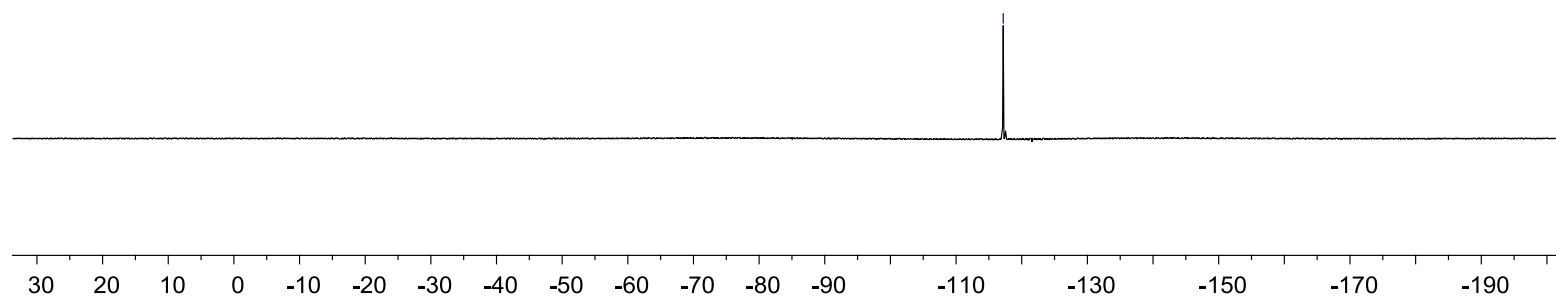



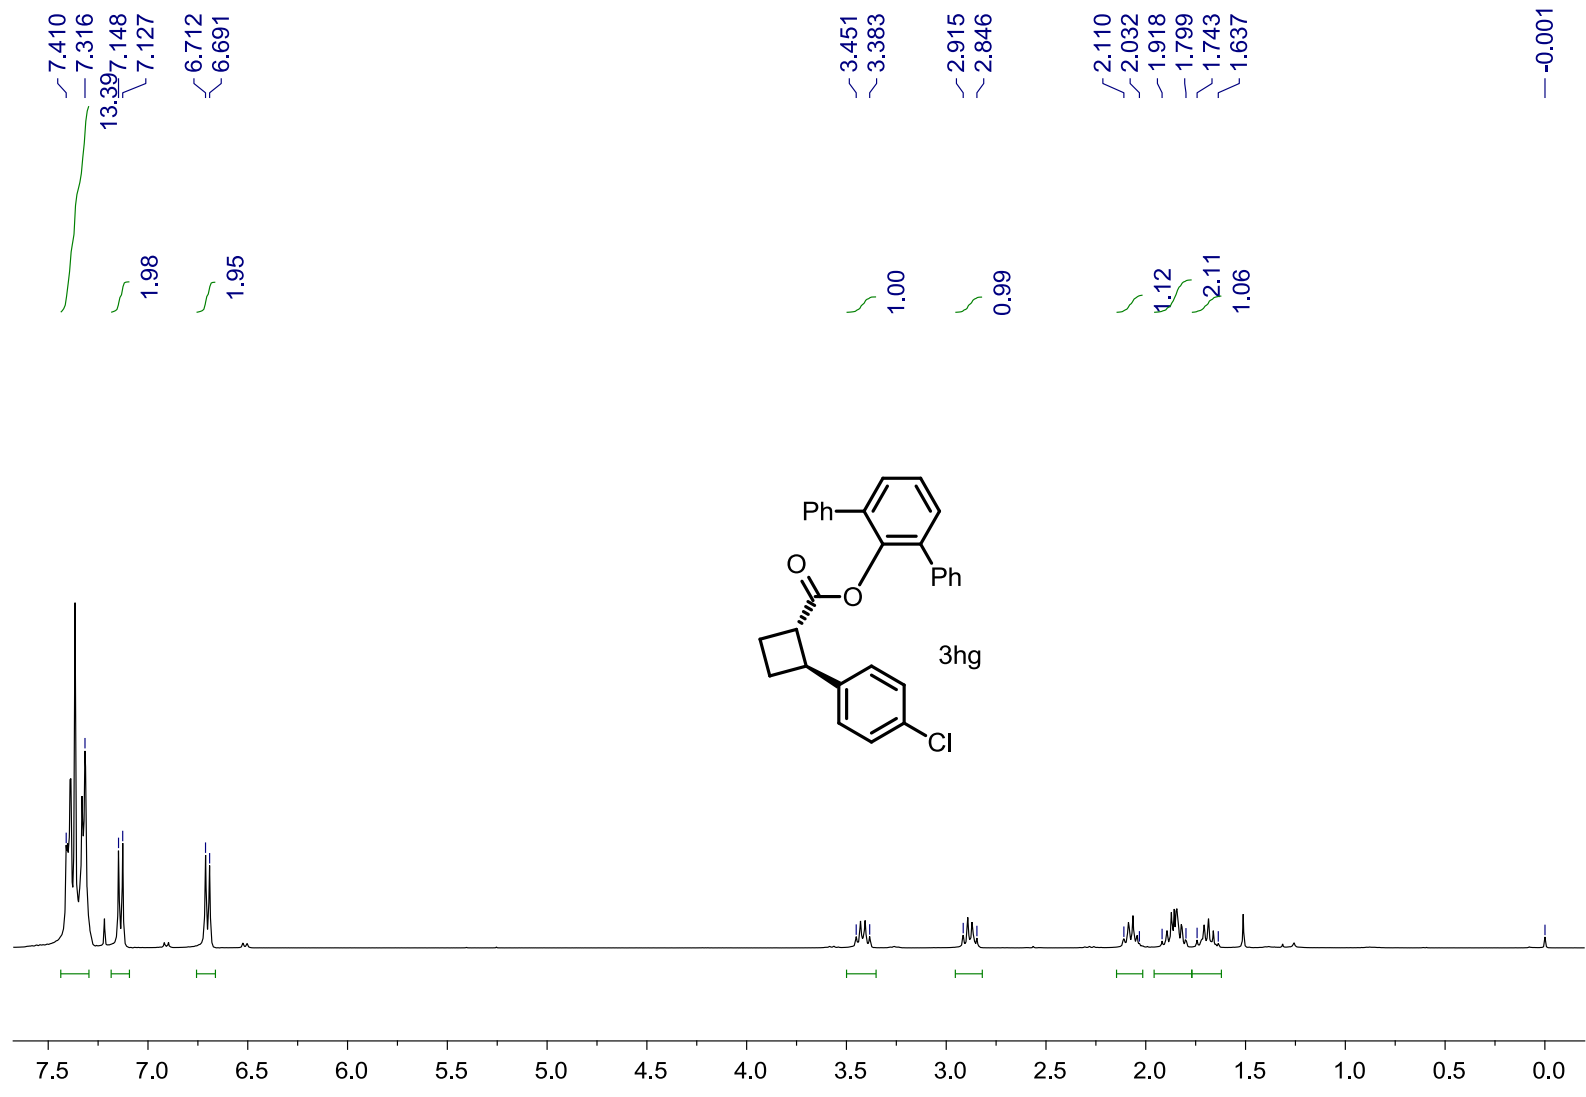

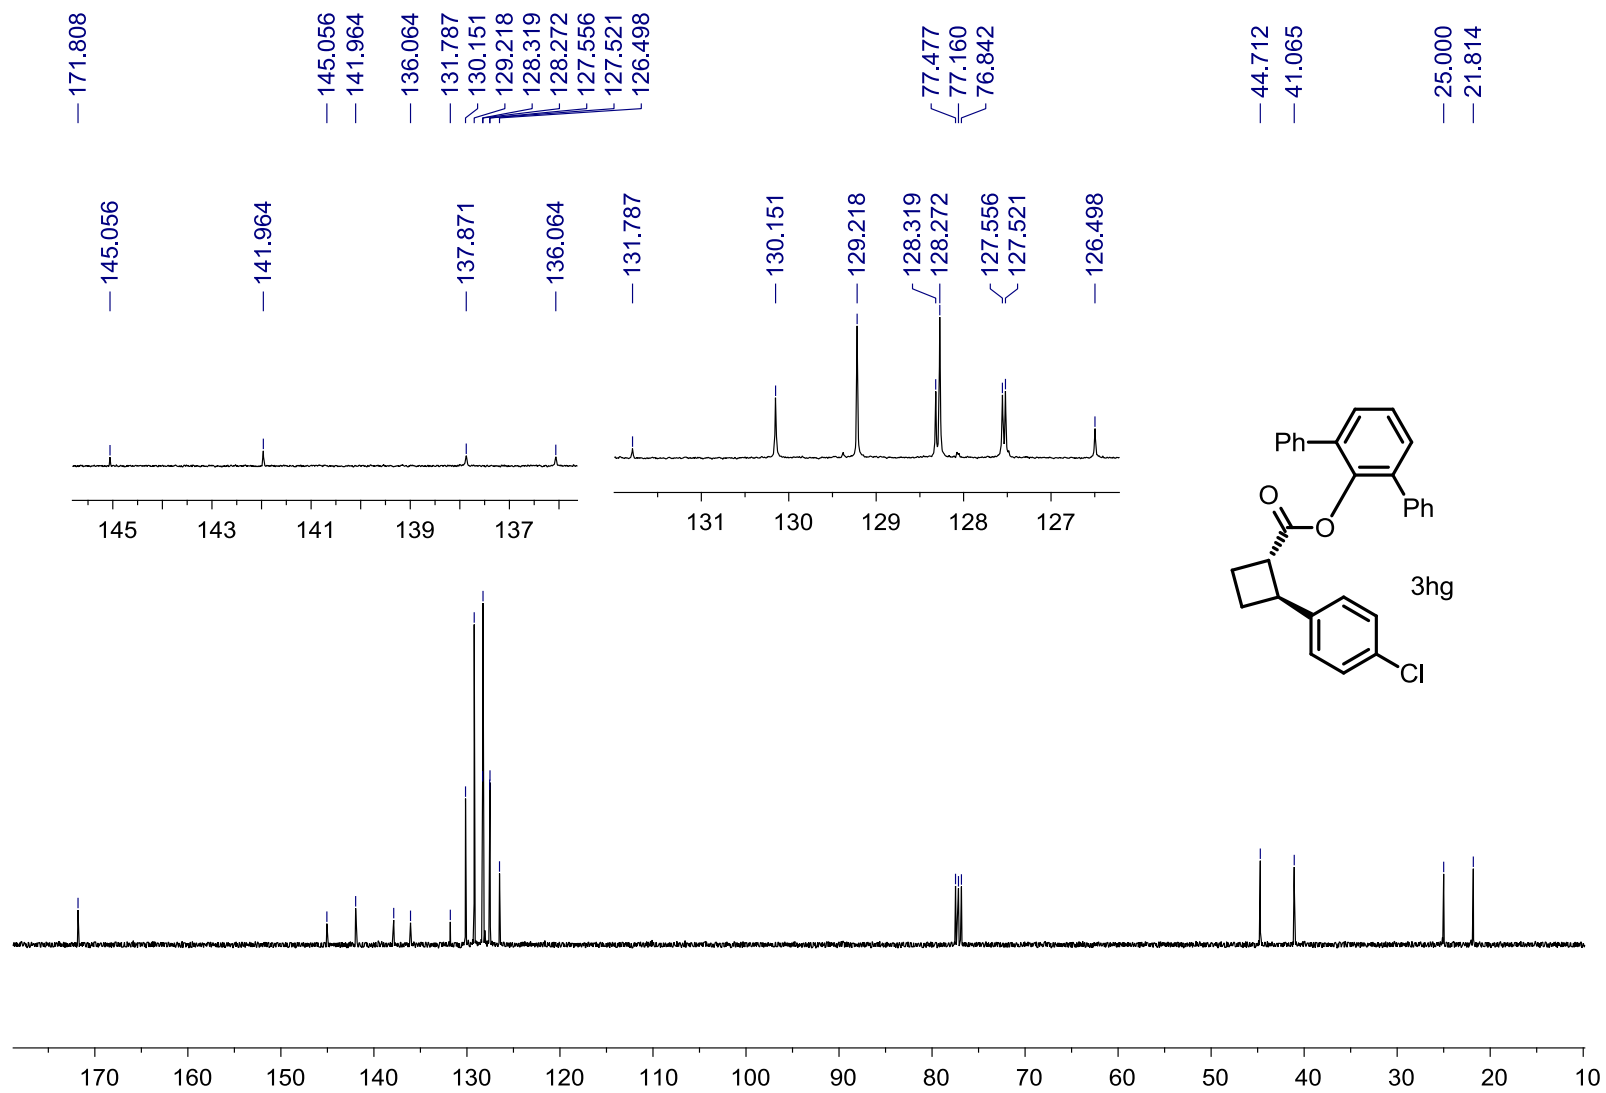

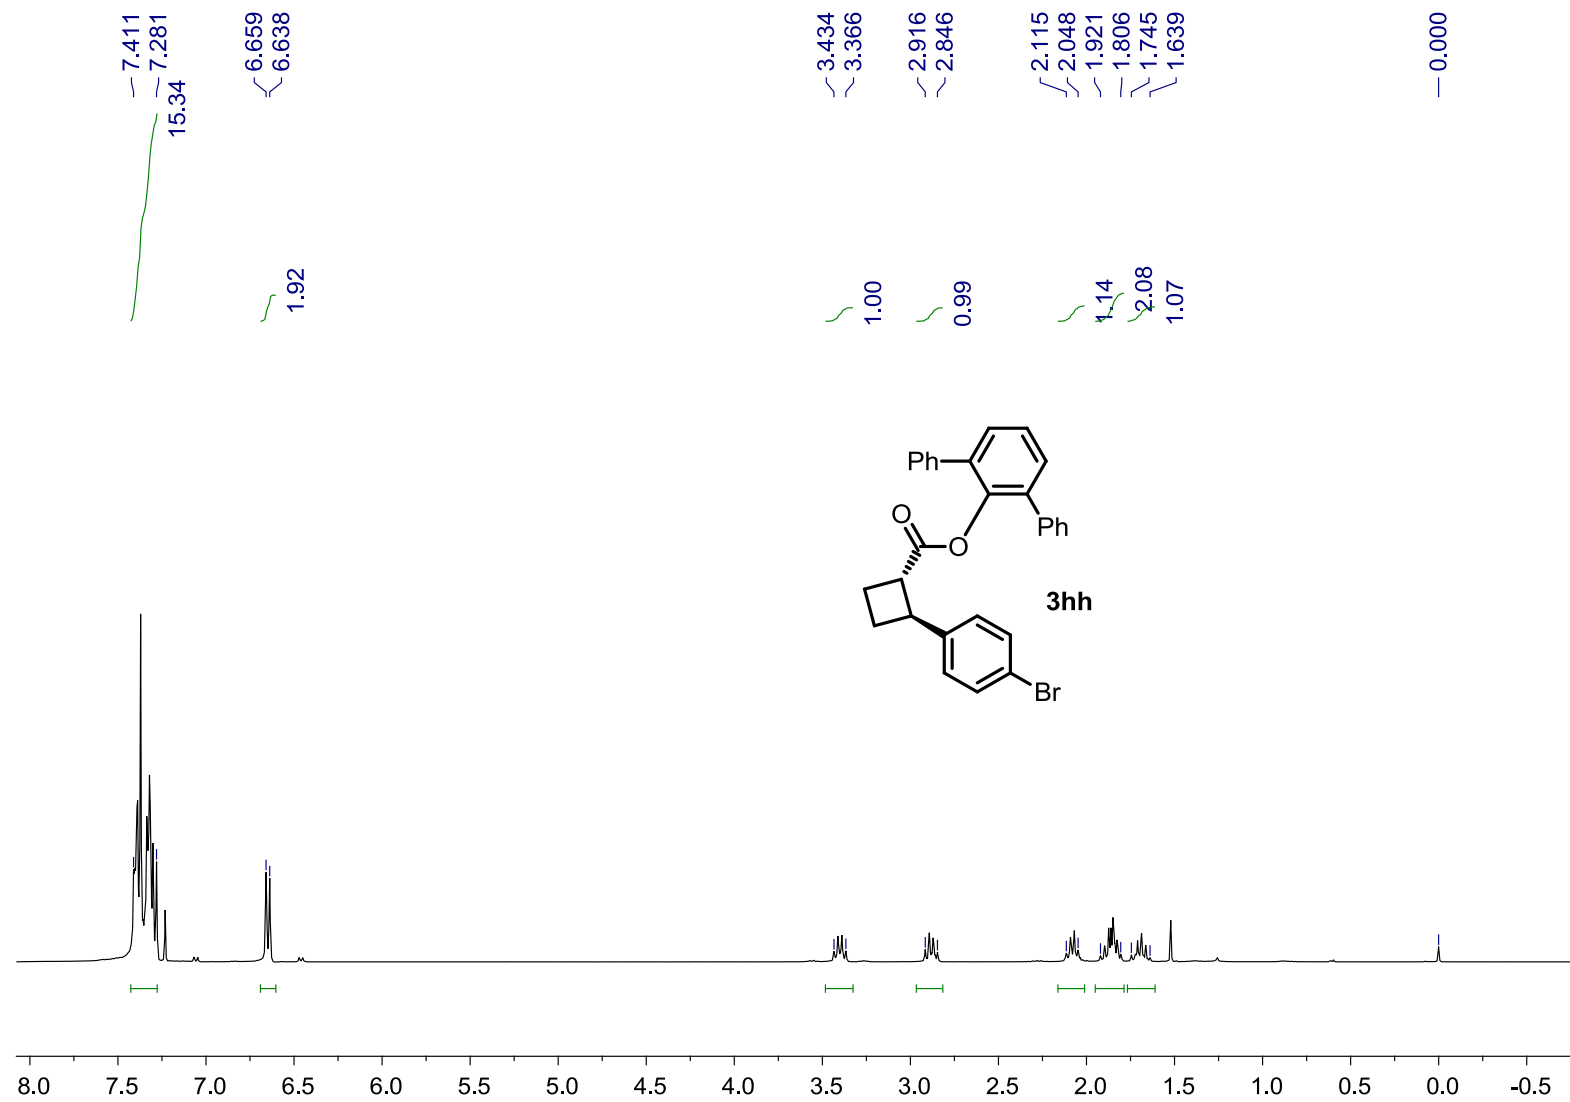

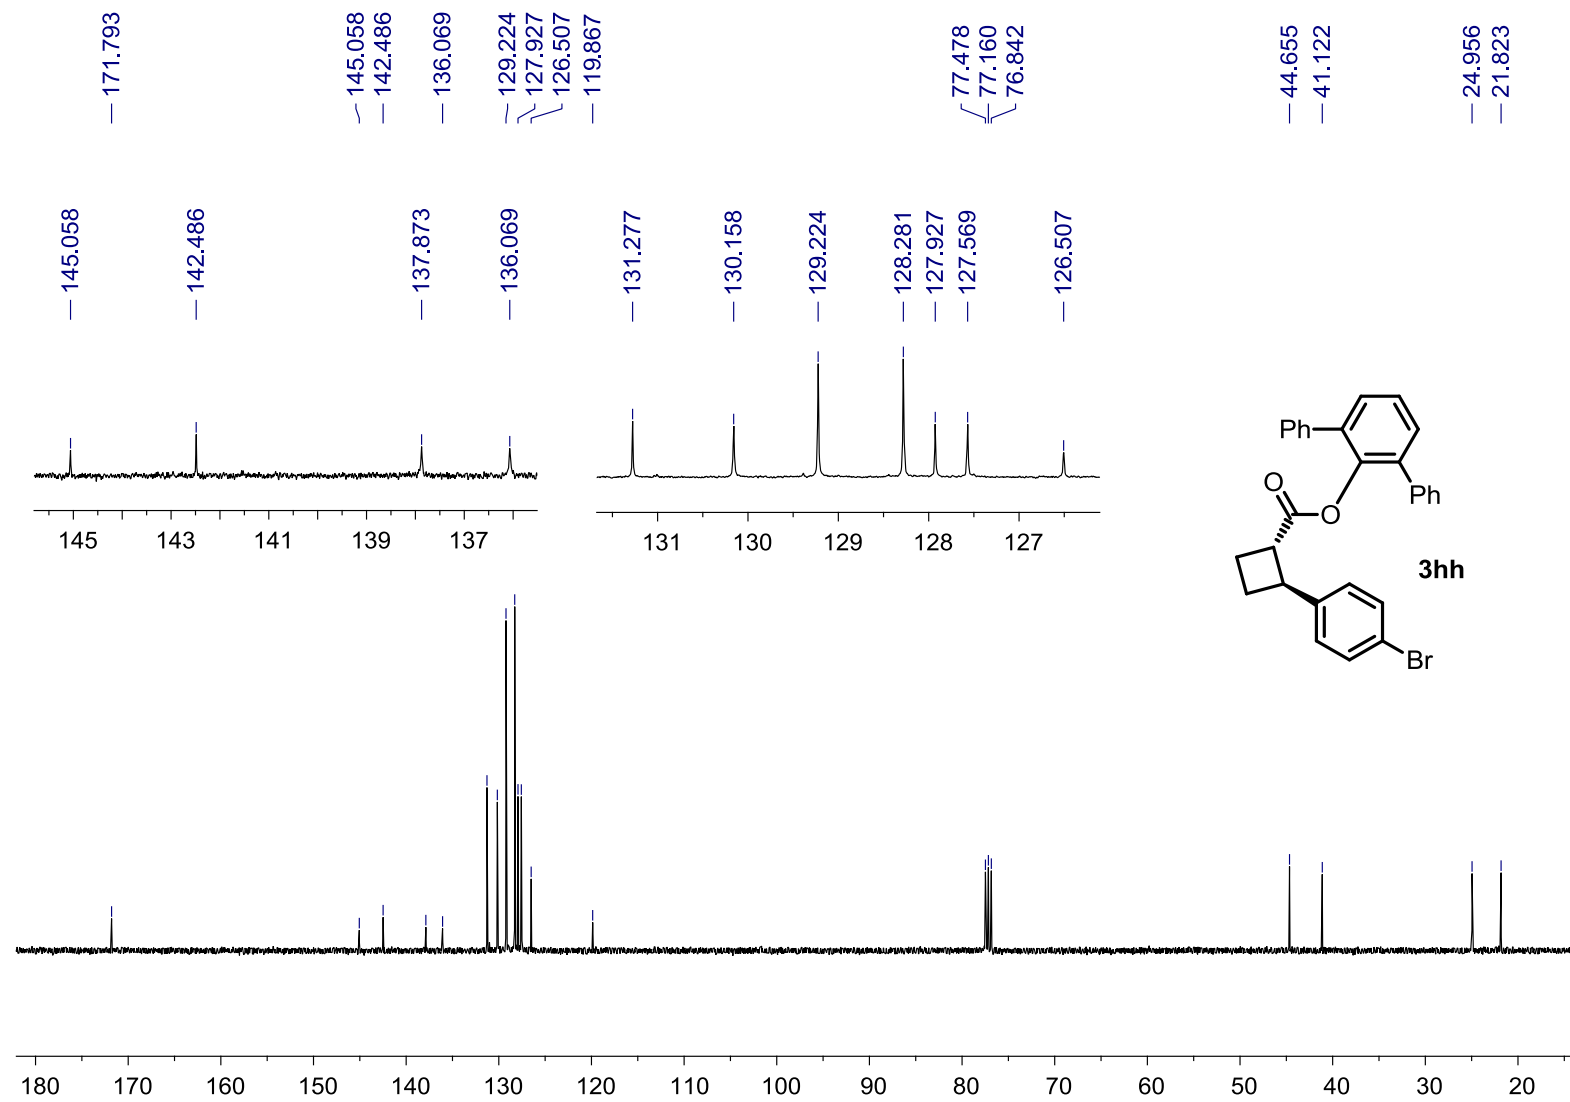

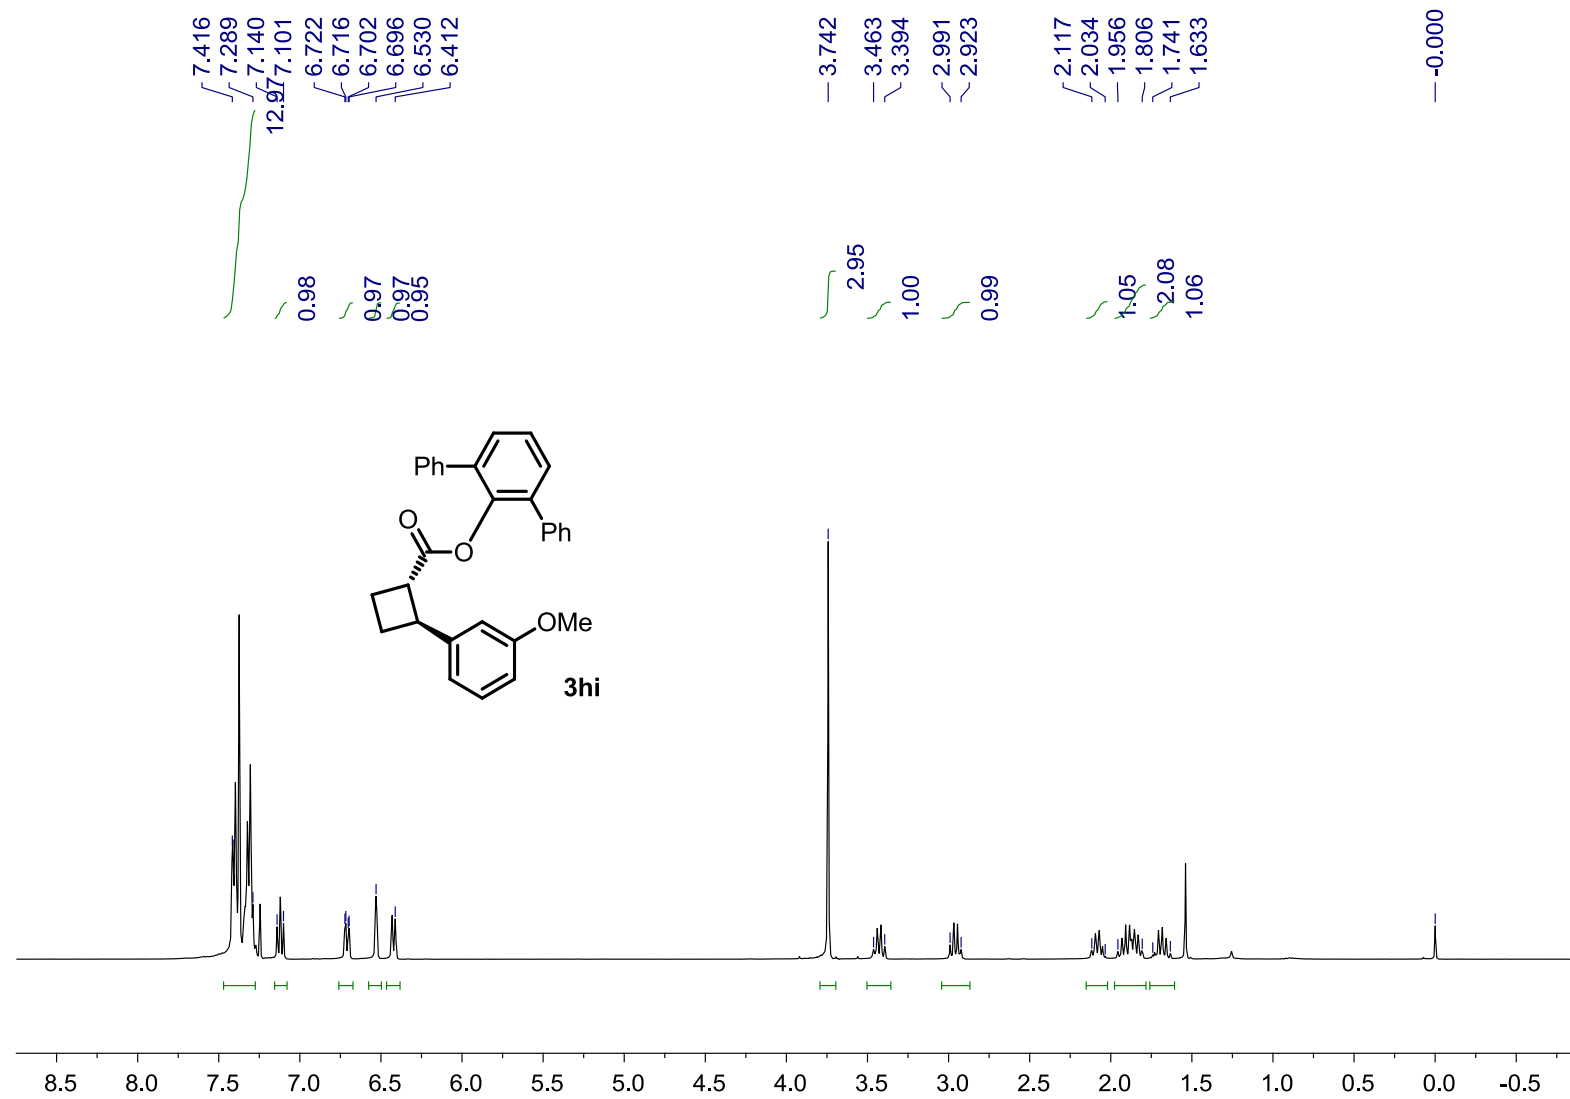

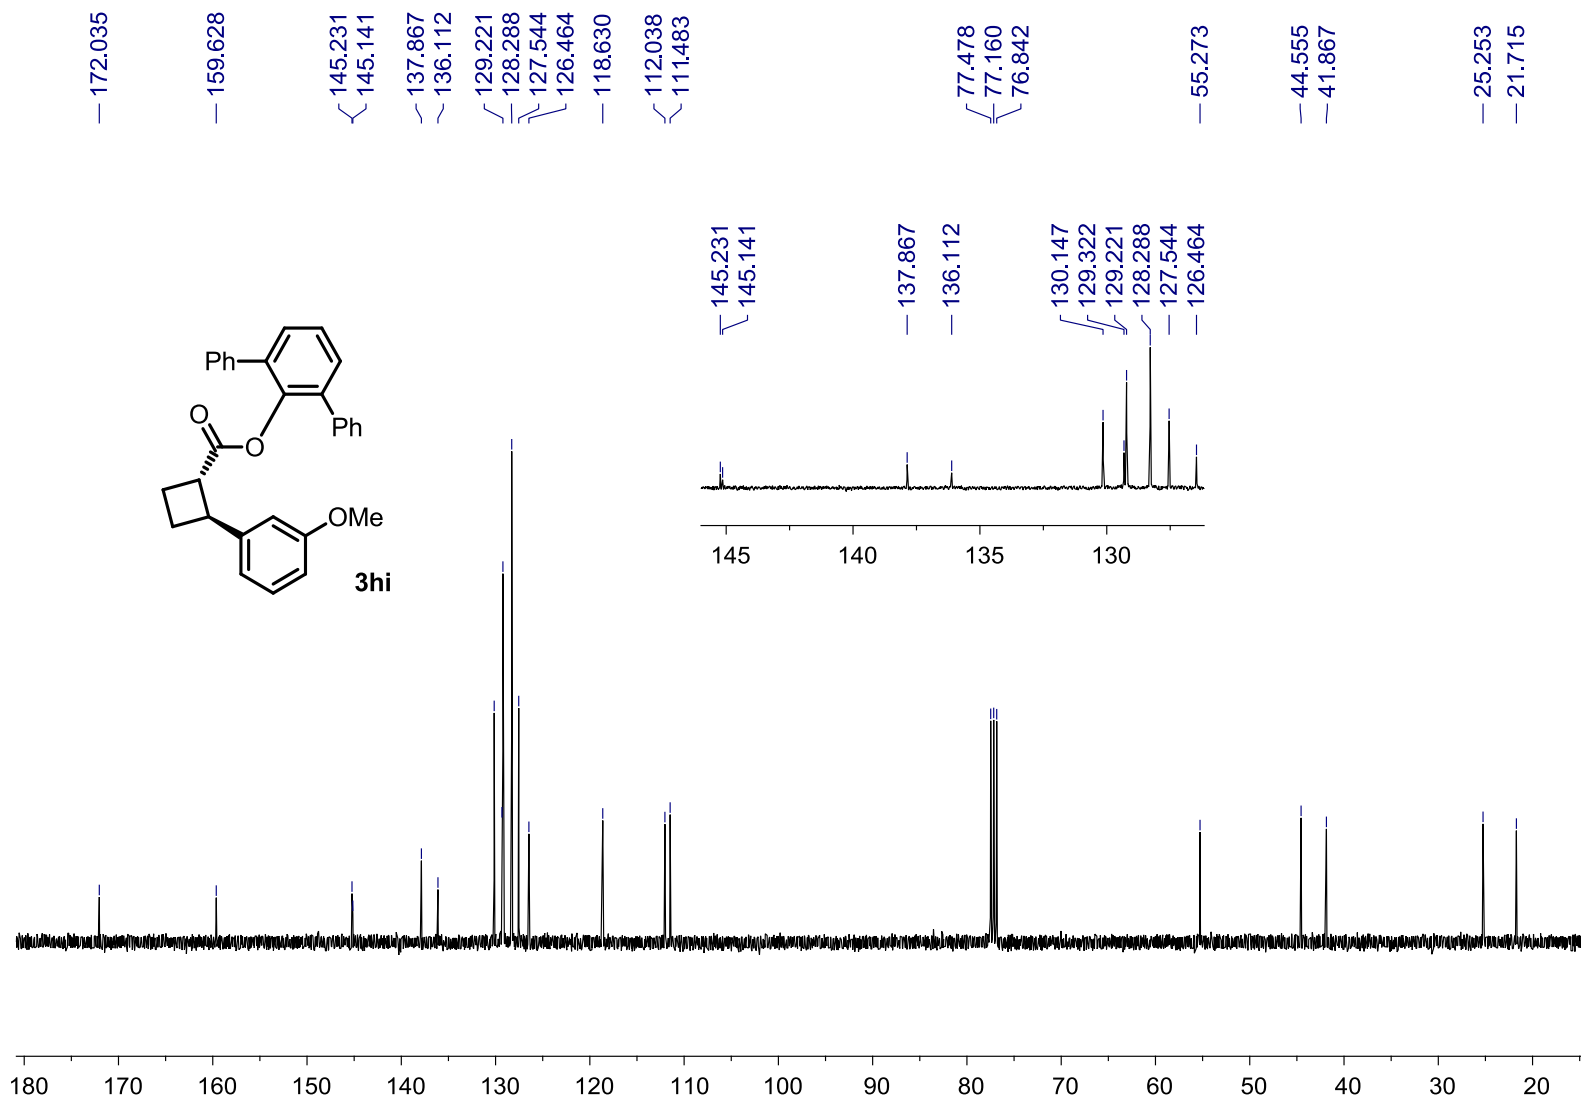

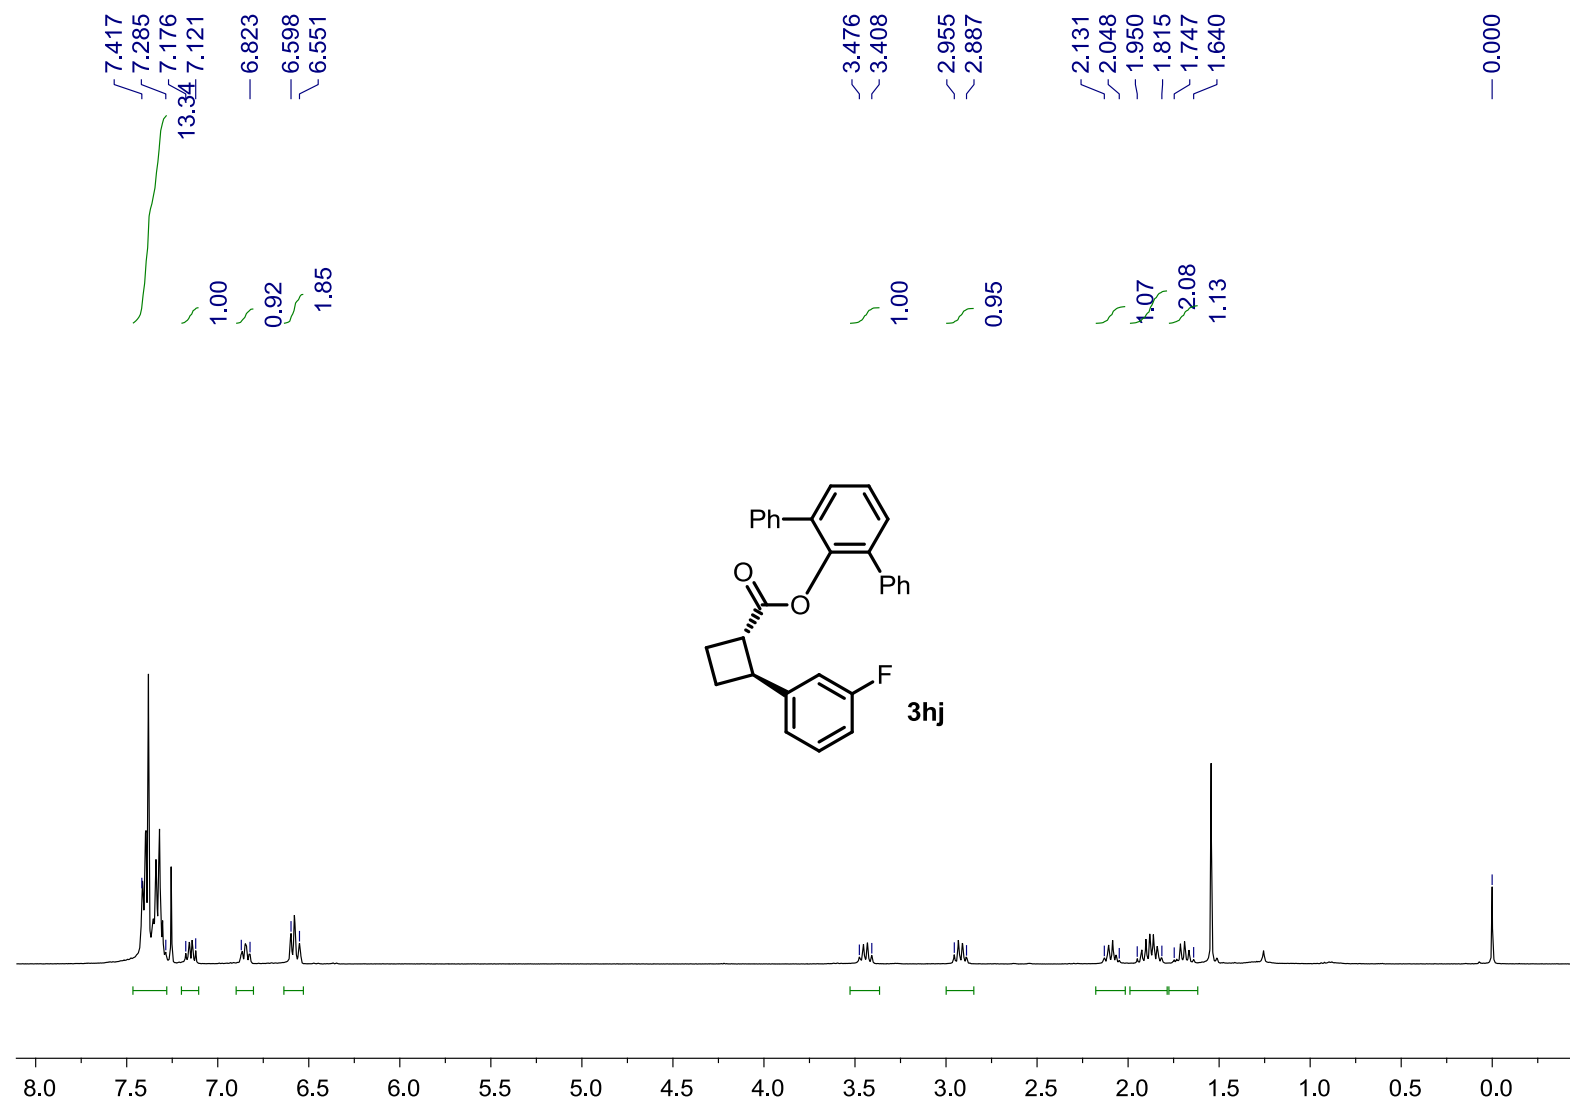

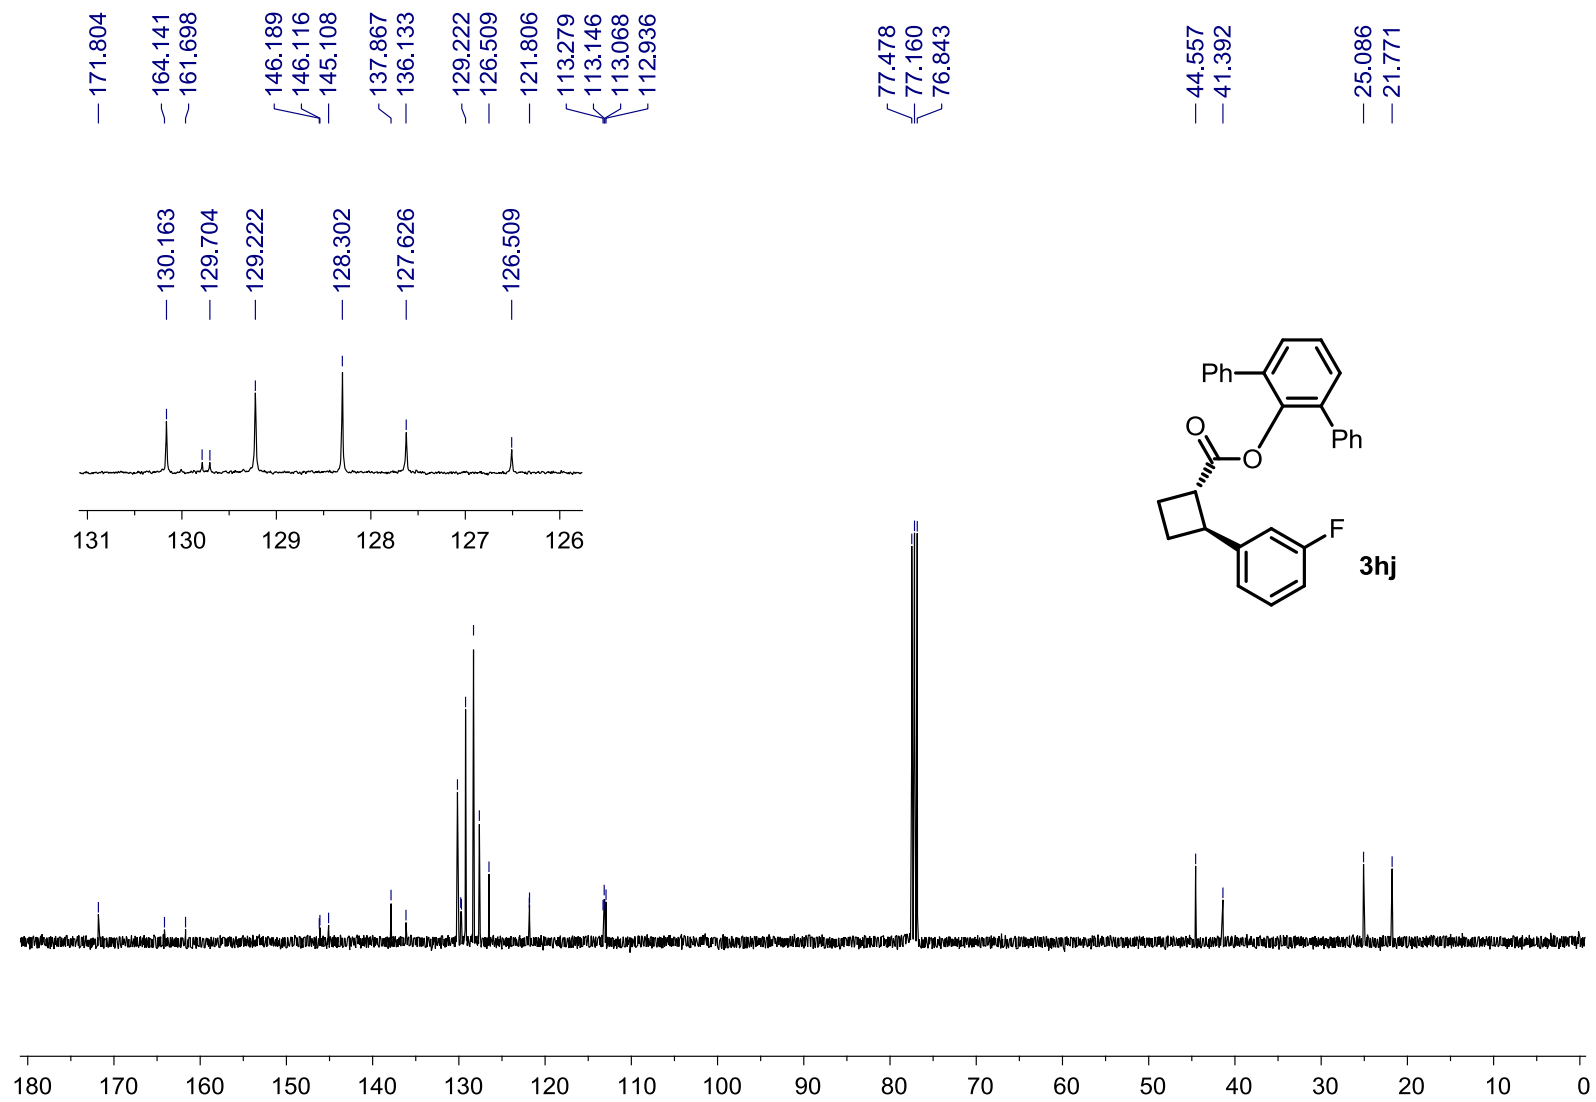



-113.526

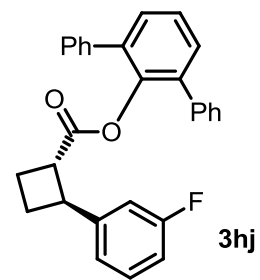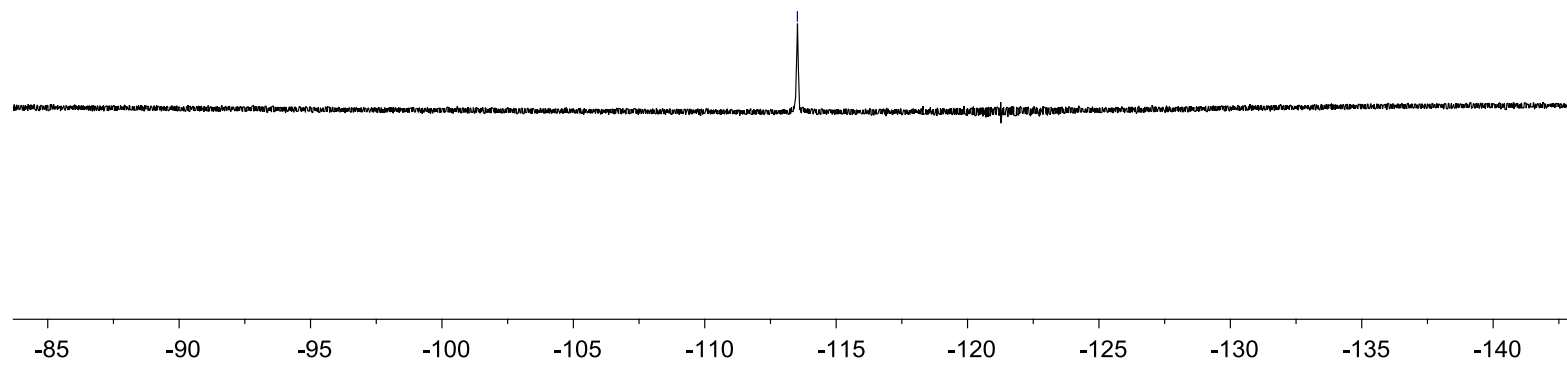

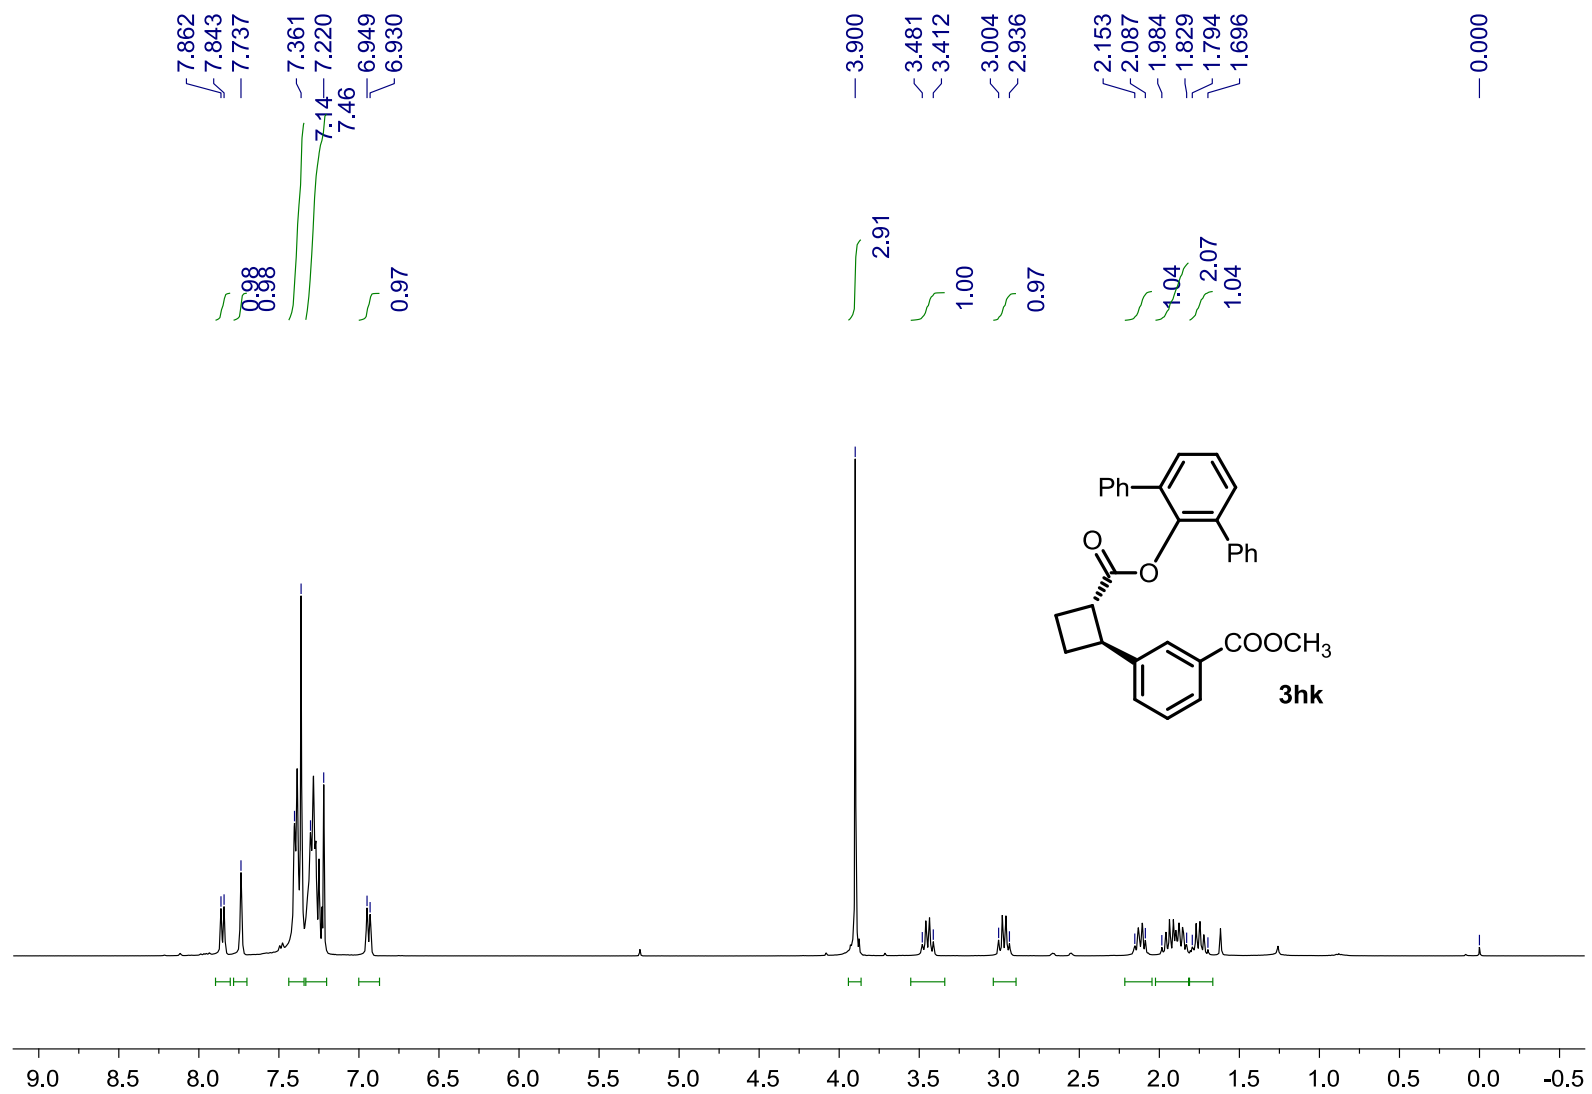

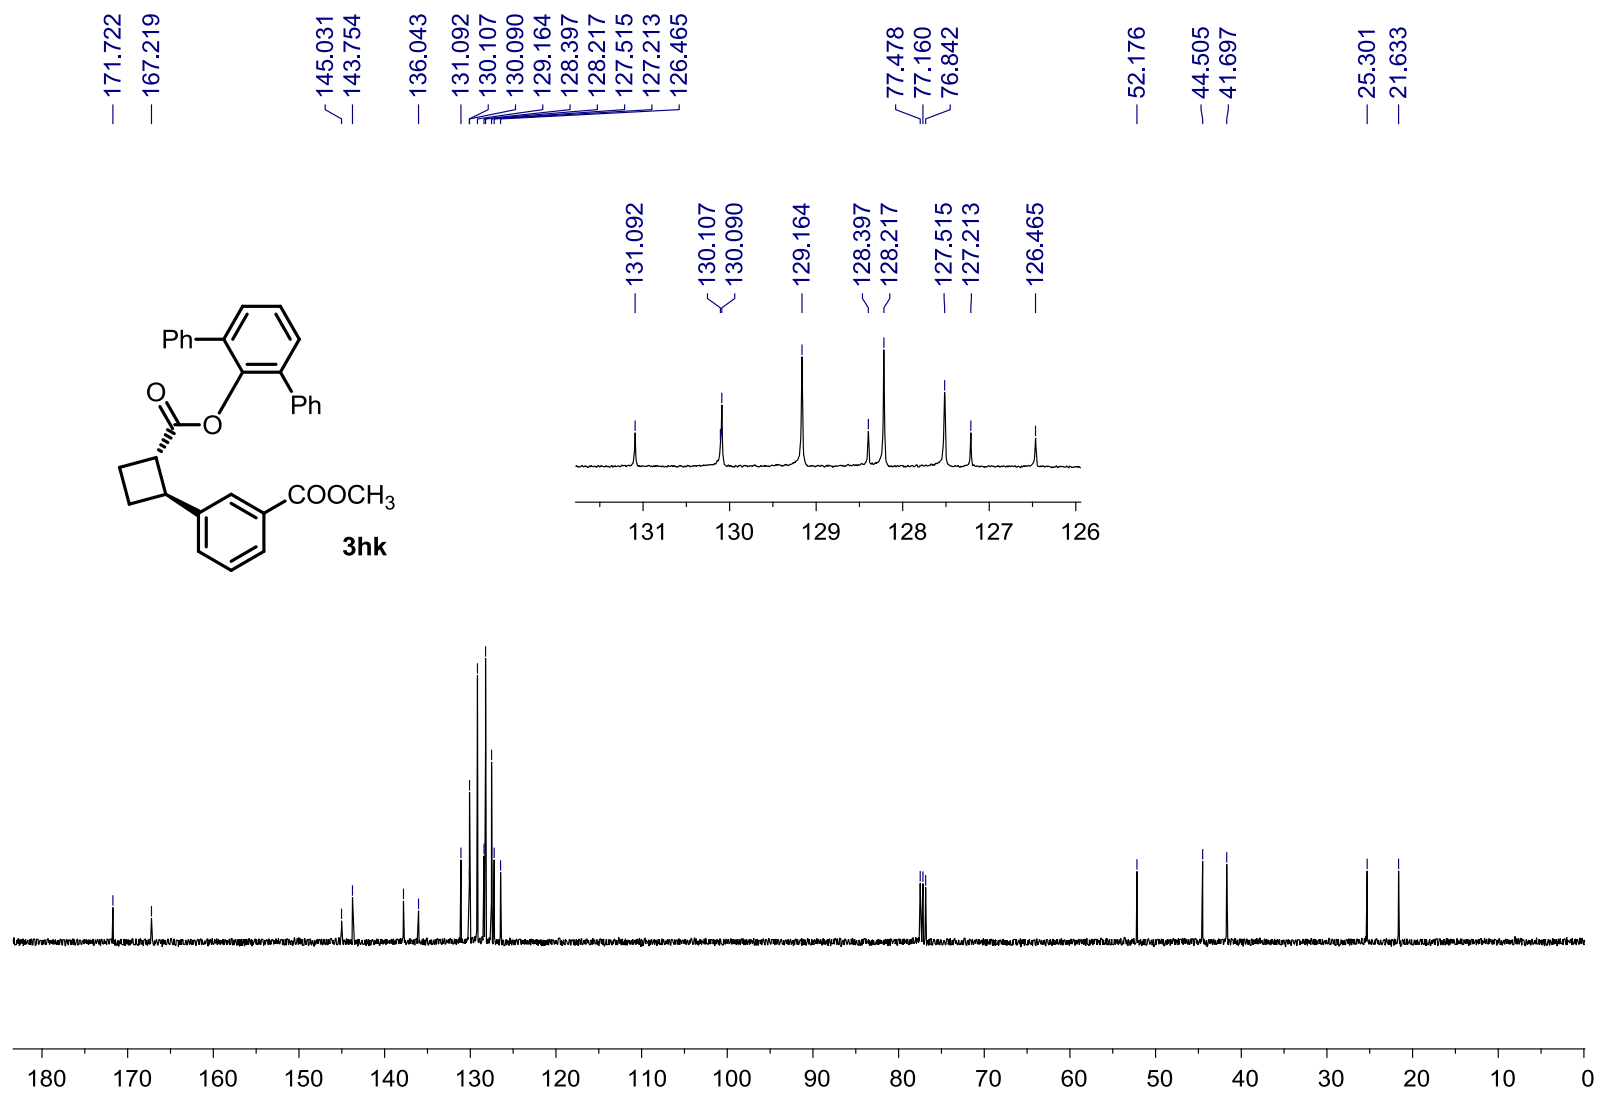

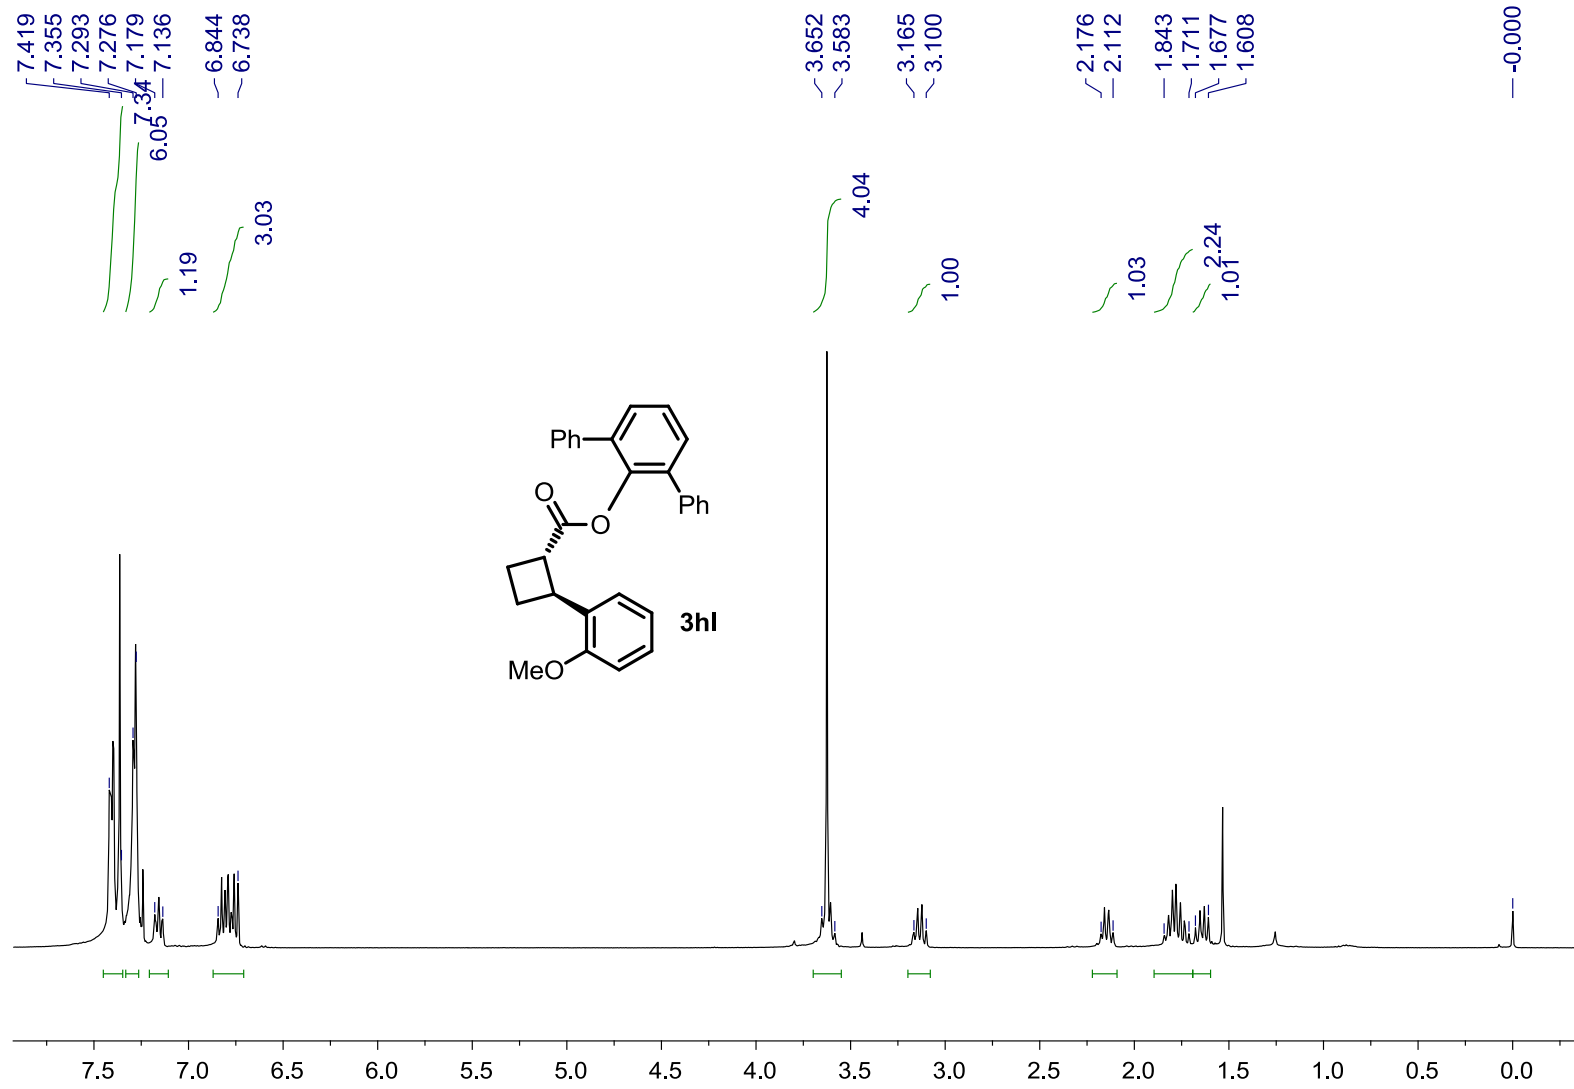

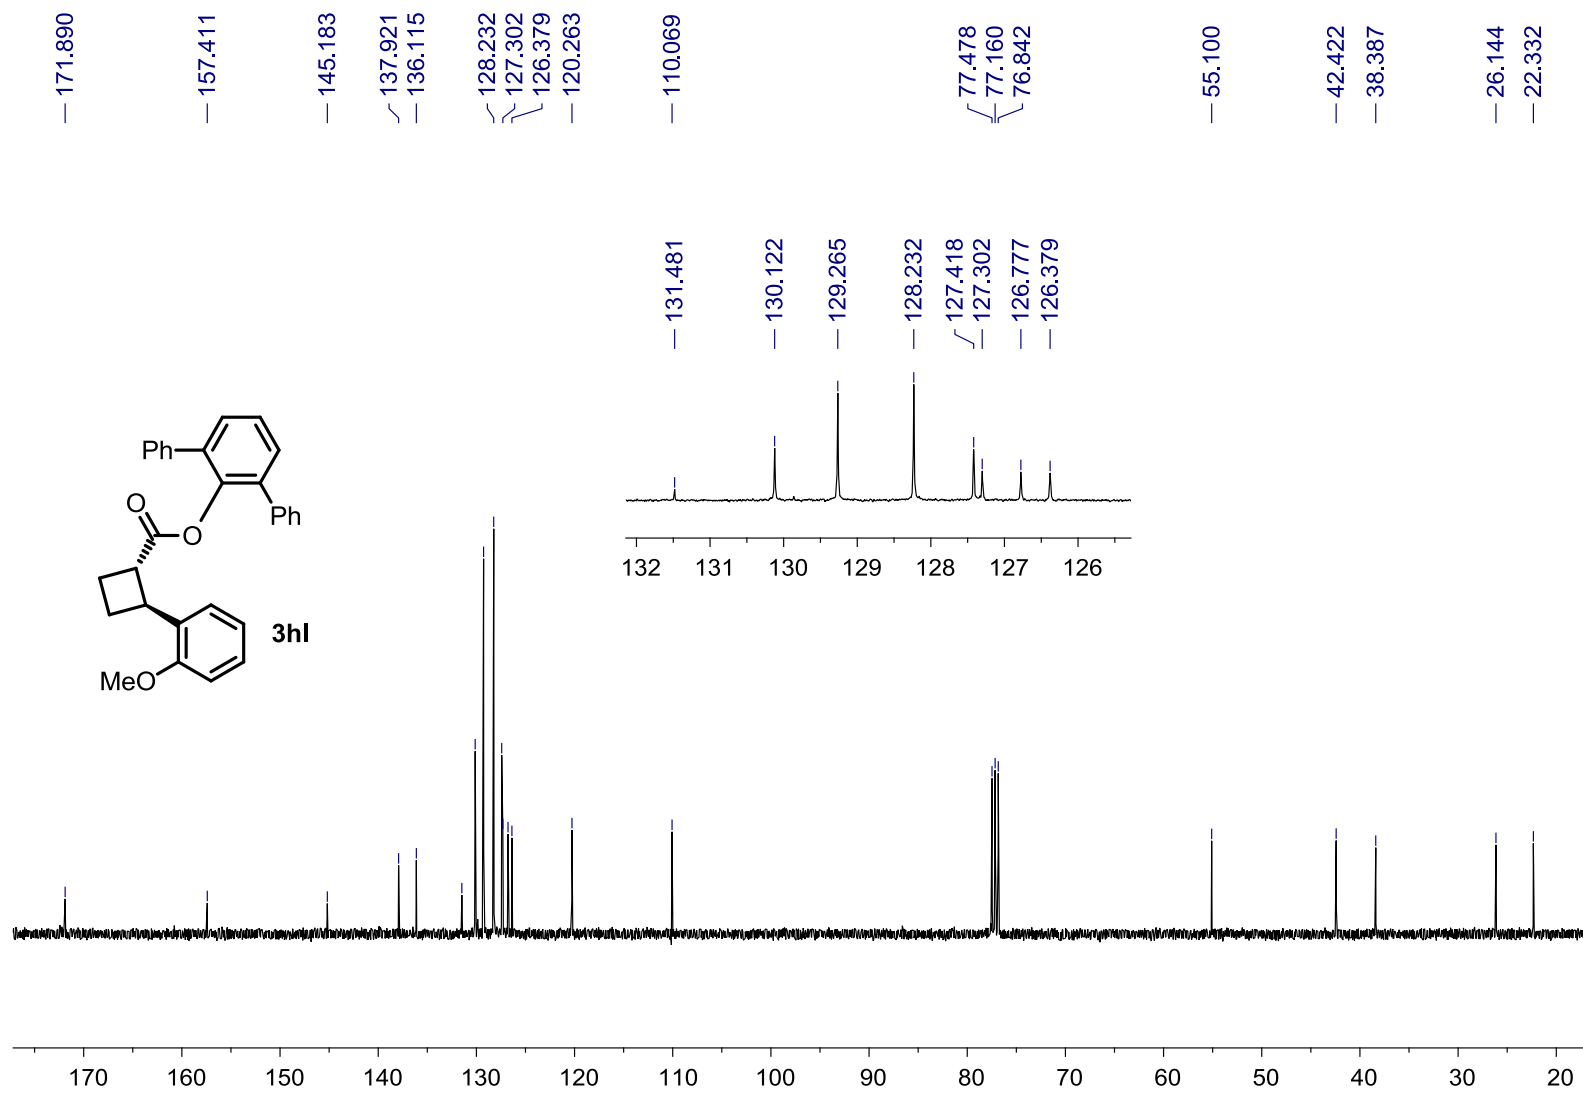

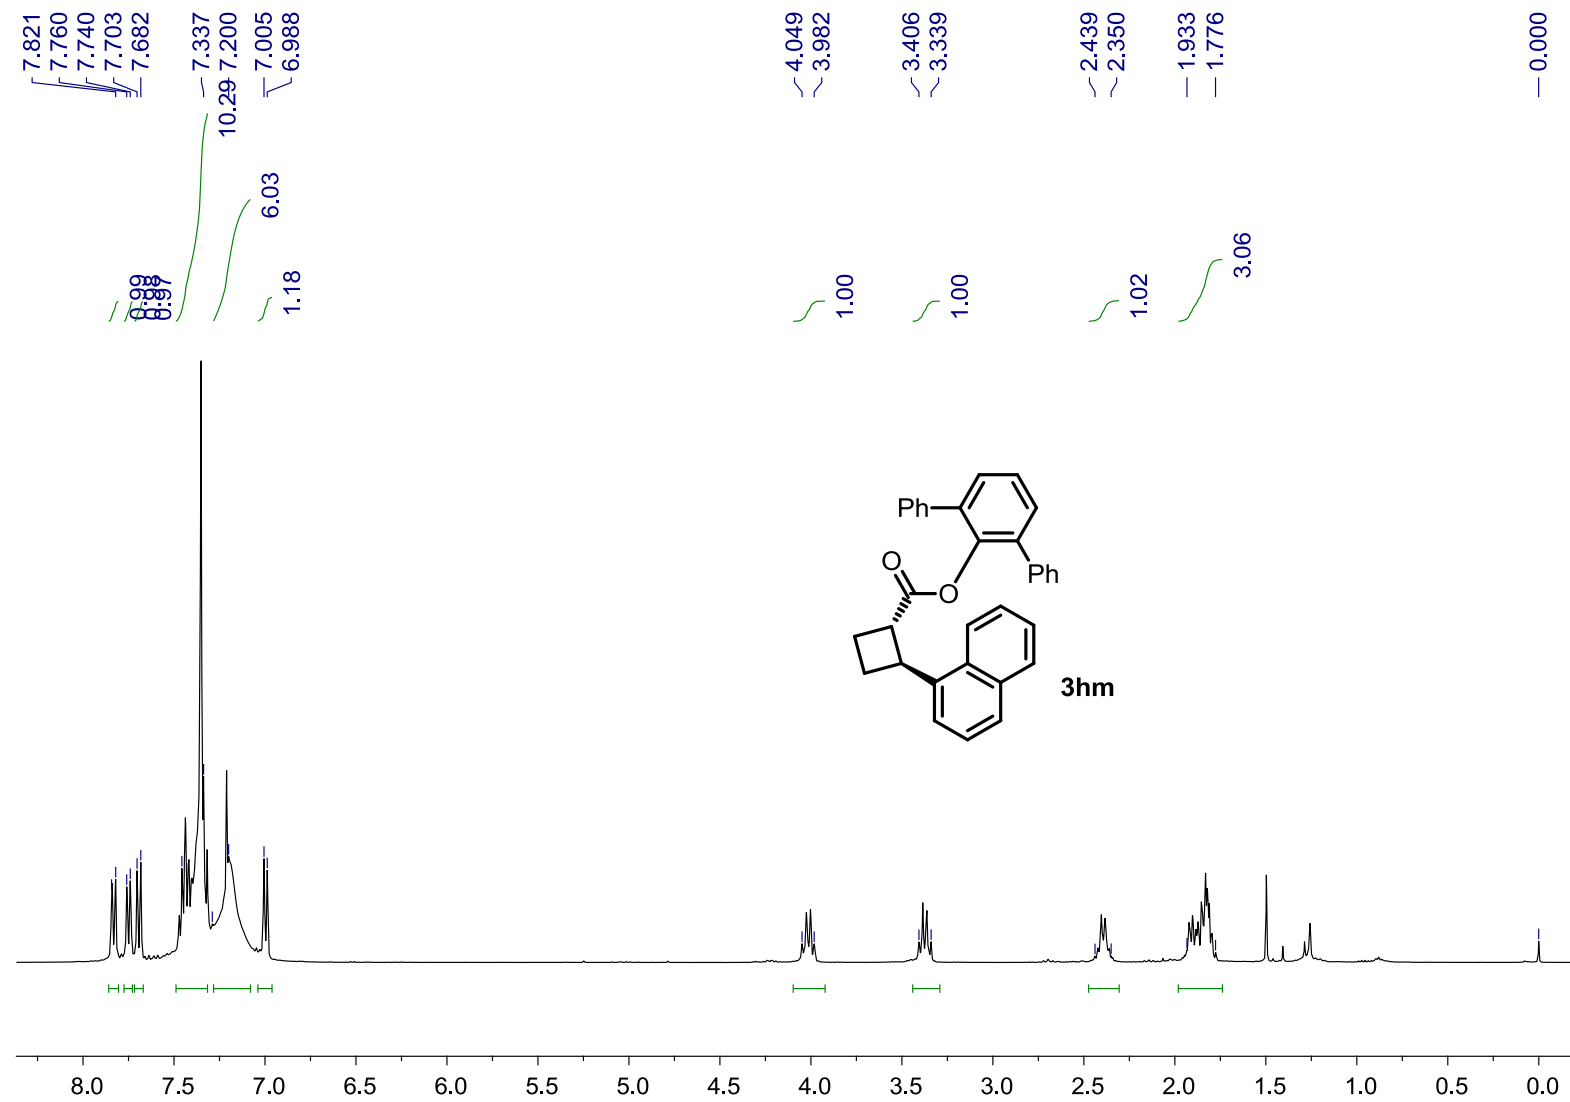

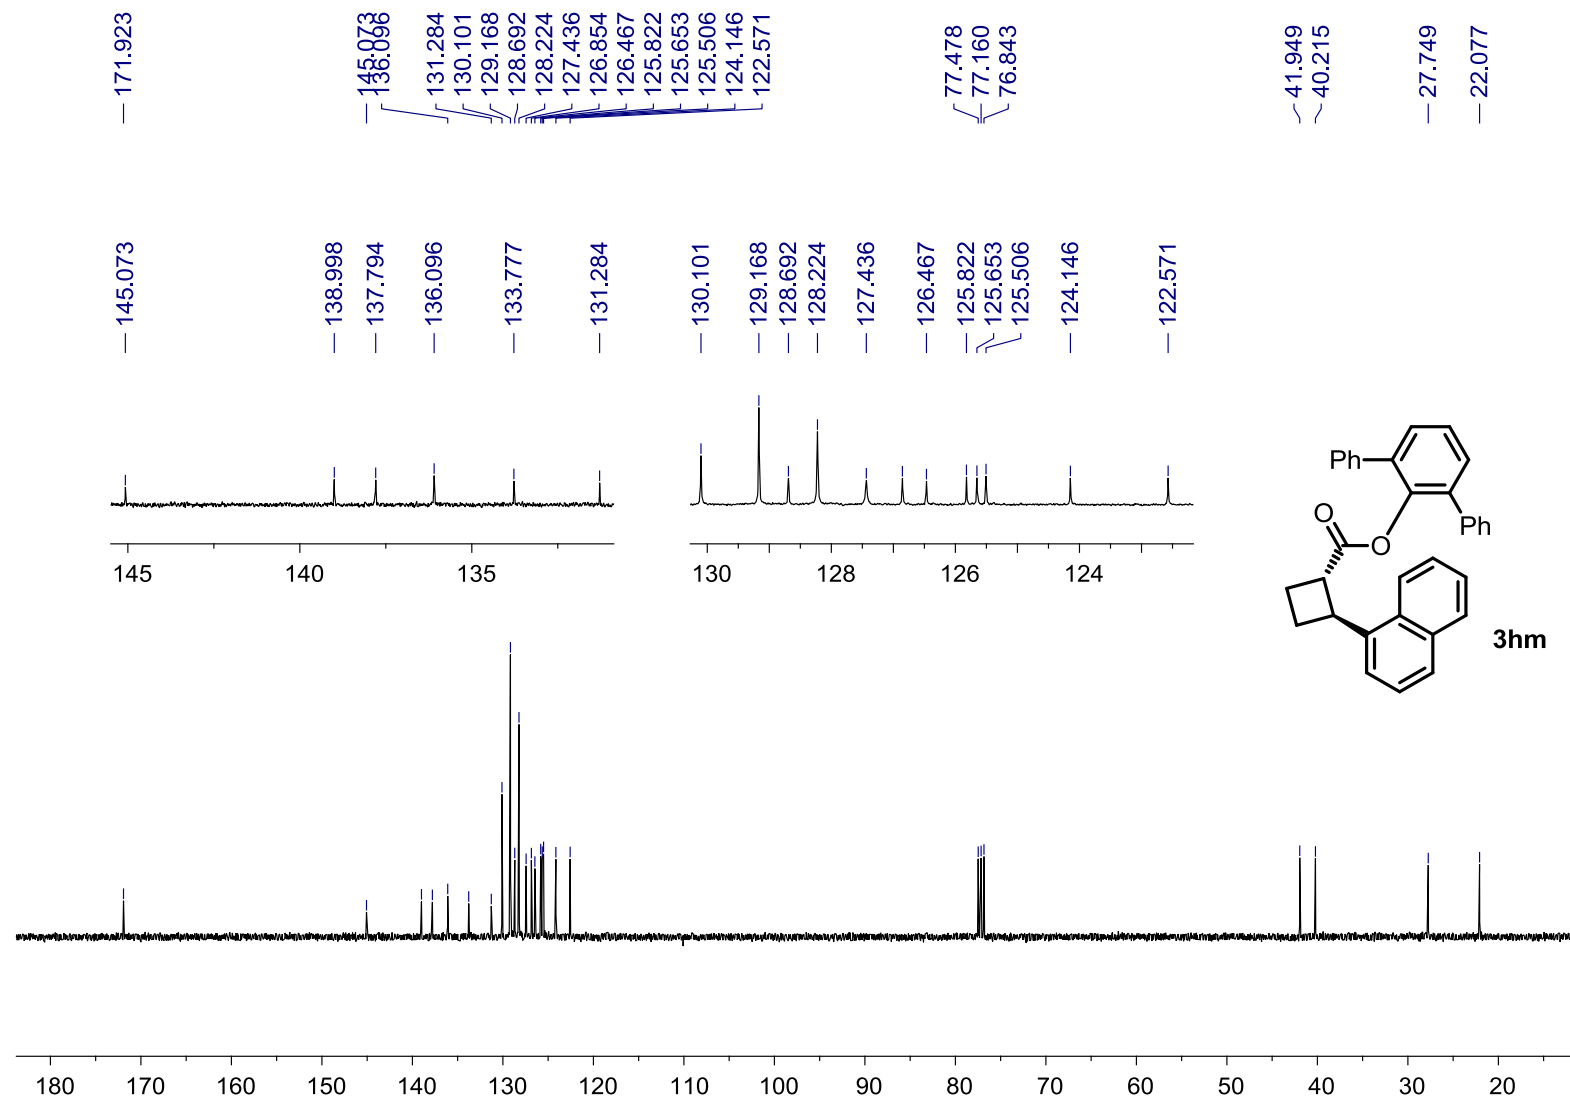

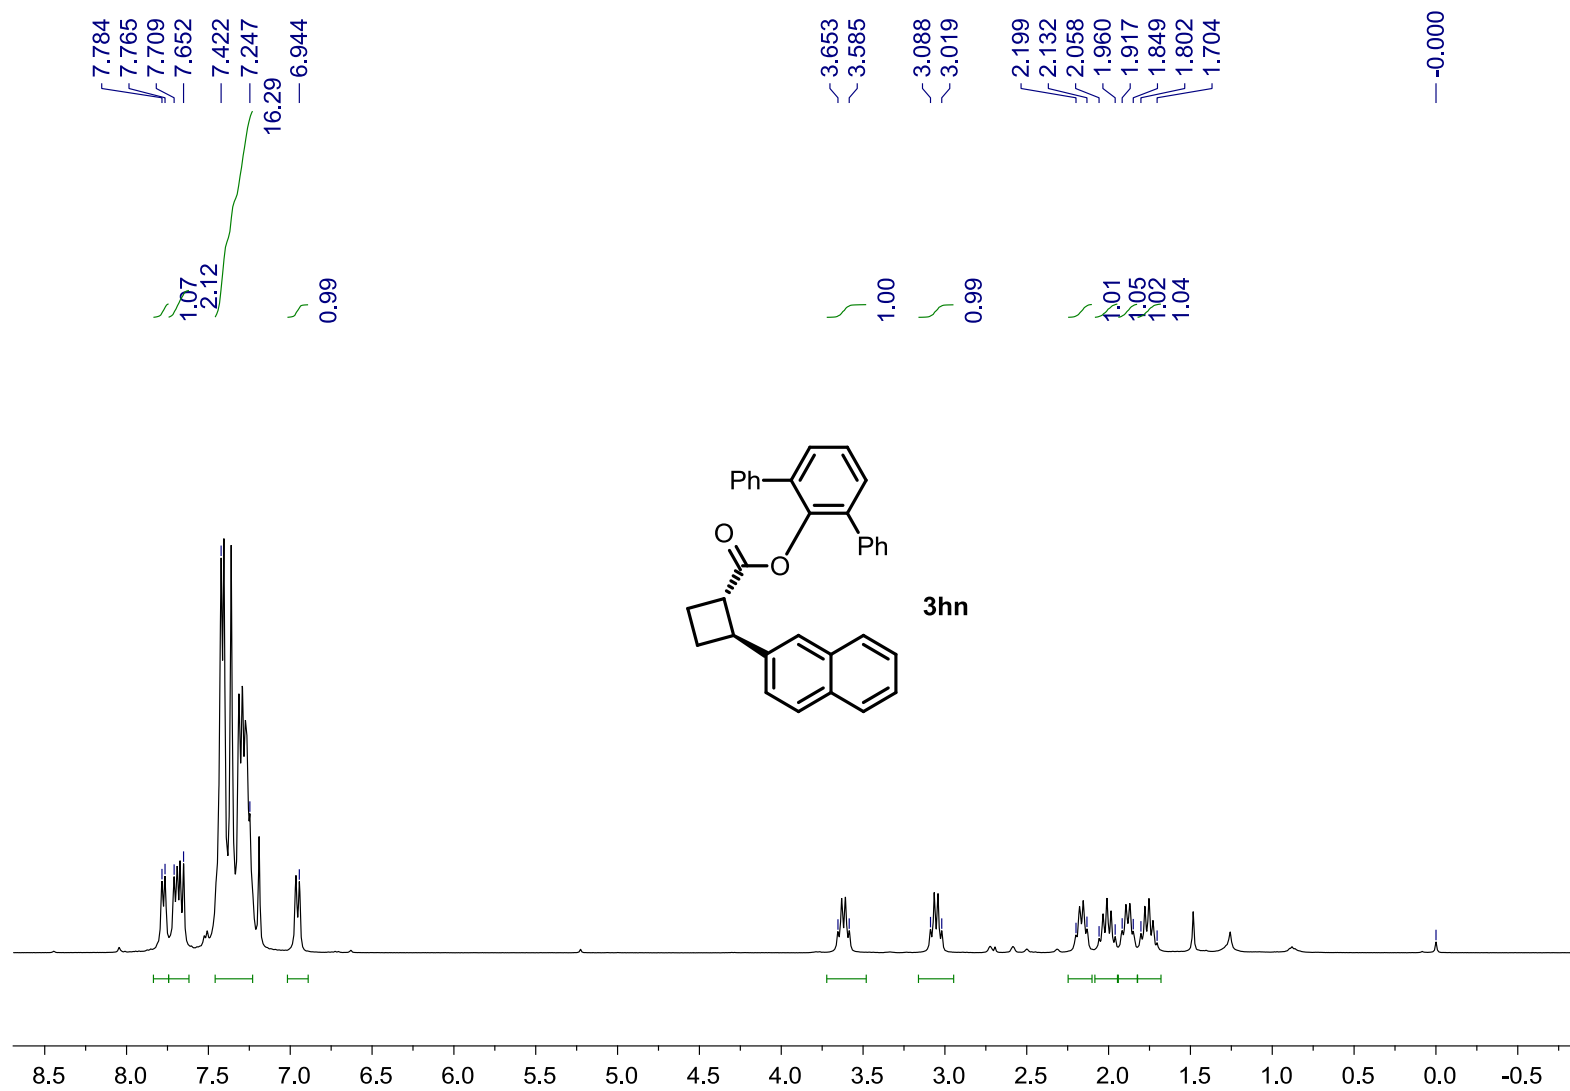



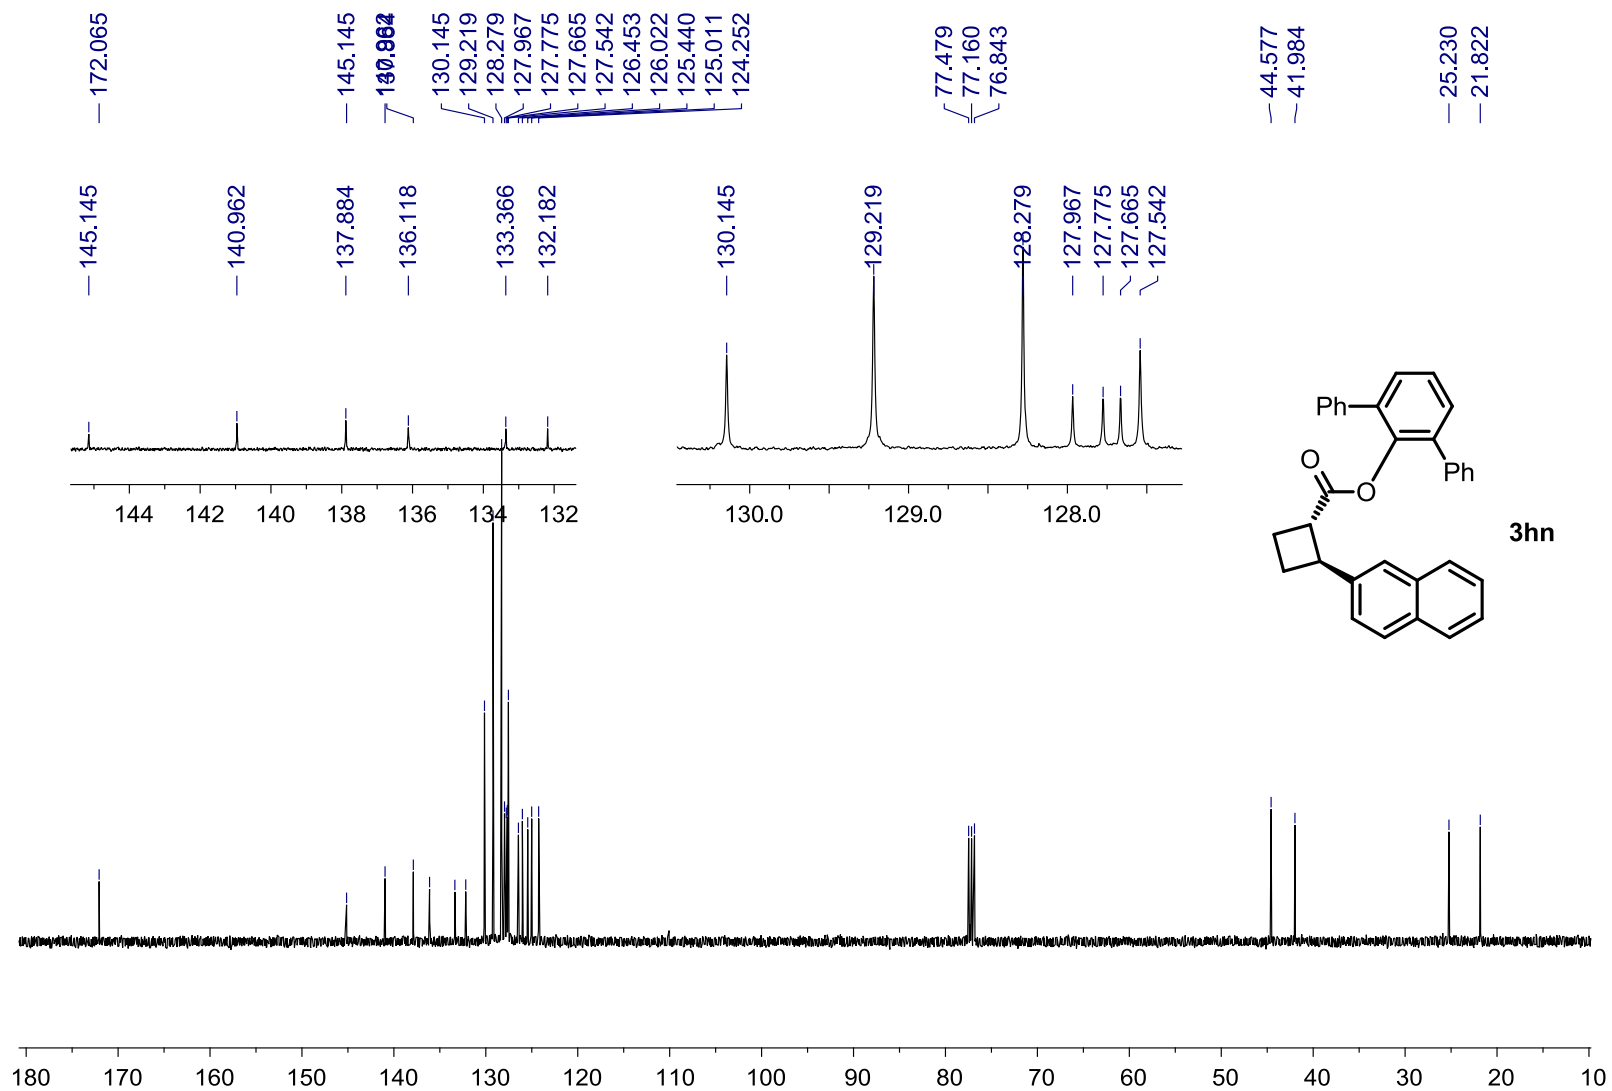

7.252  
7.184  
7.133  
7.1098  
4.72  
1.02

3.784  
3.720  
3.649  
3.239  
3.172  
2.617  
2.566  
2.513  
2.237  
2.172  
2.048  
1.904  
1.763  
1.669  
1.96  
1.02  
1.00  
1.09  
2.13  
1.18

-0.000

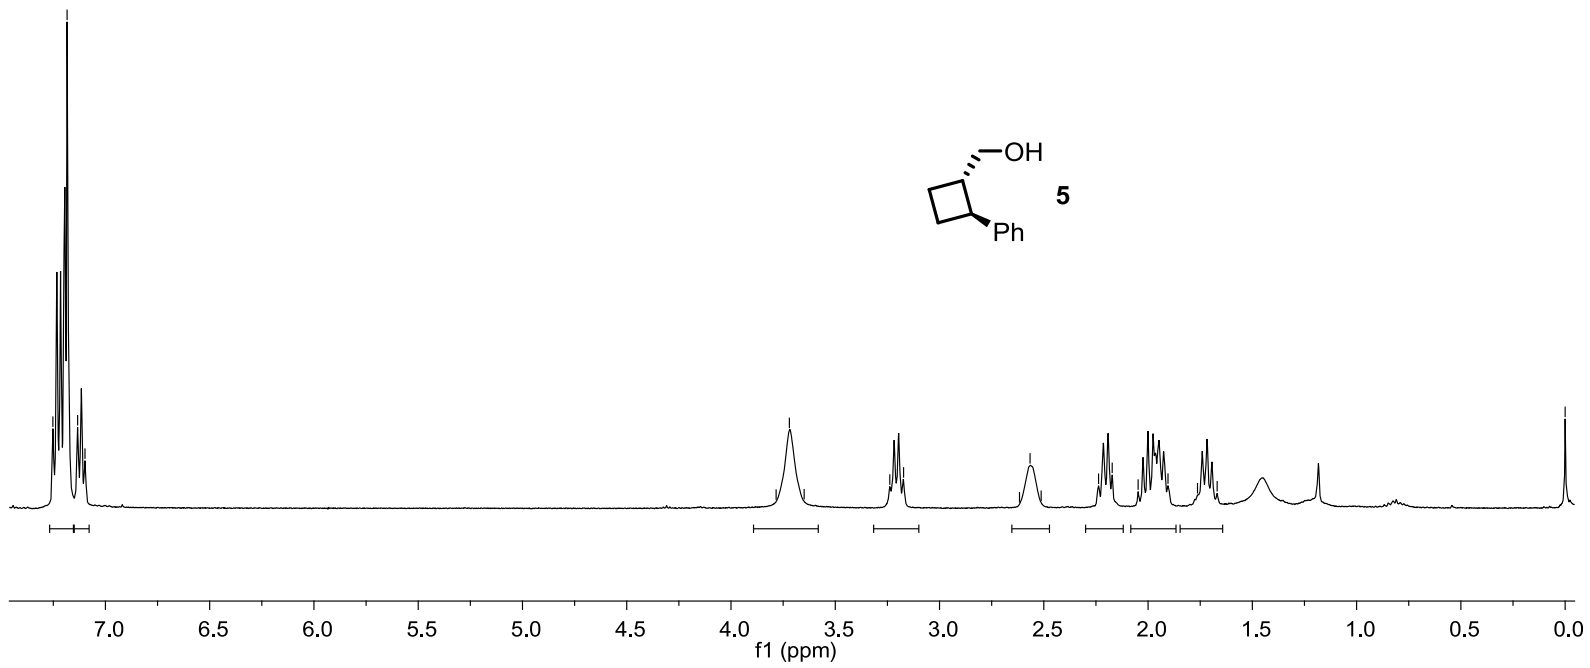

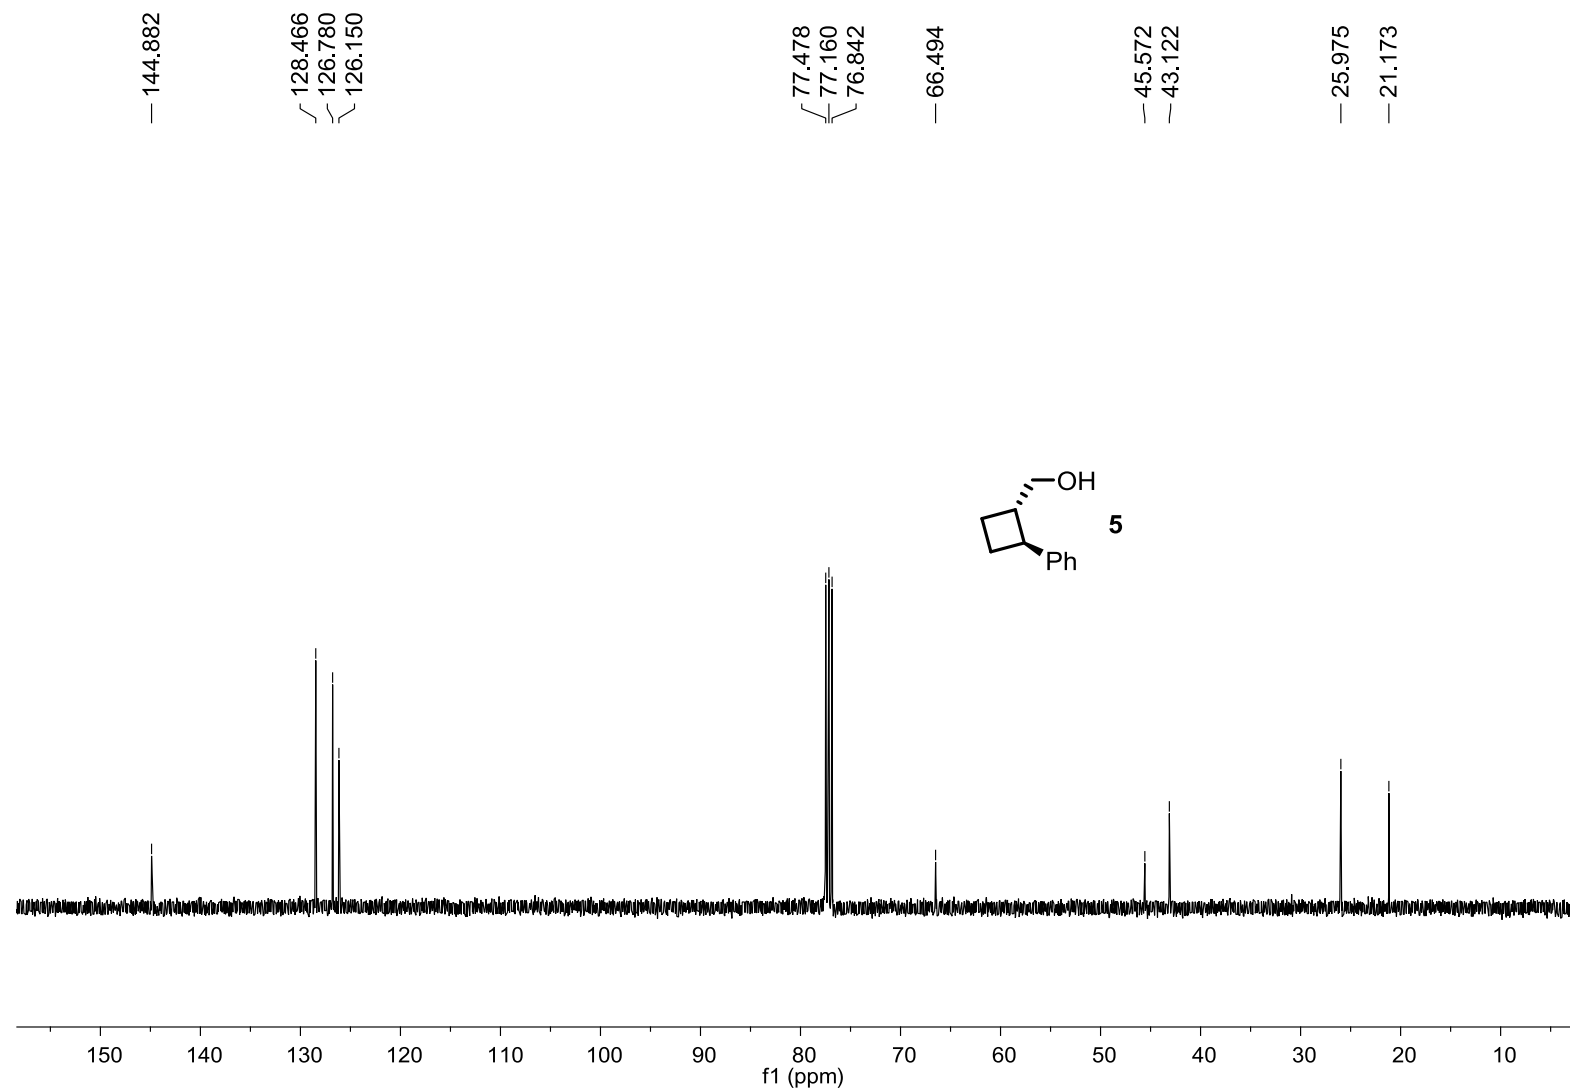

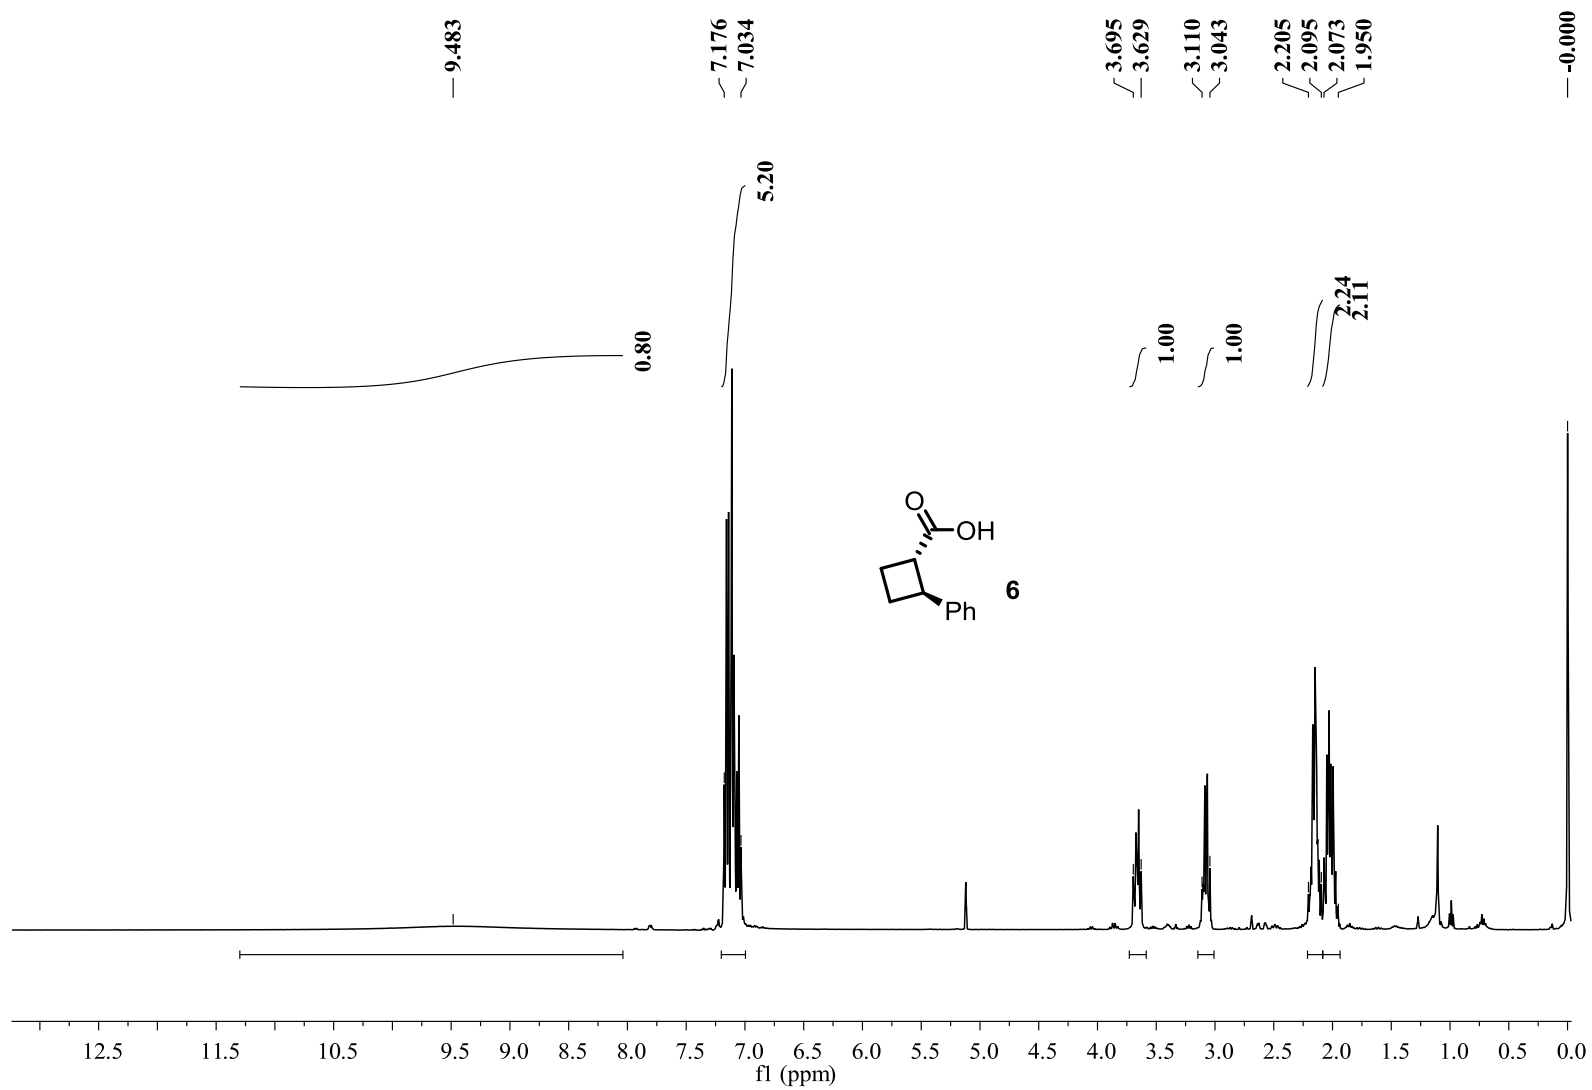

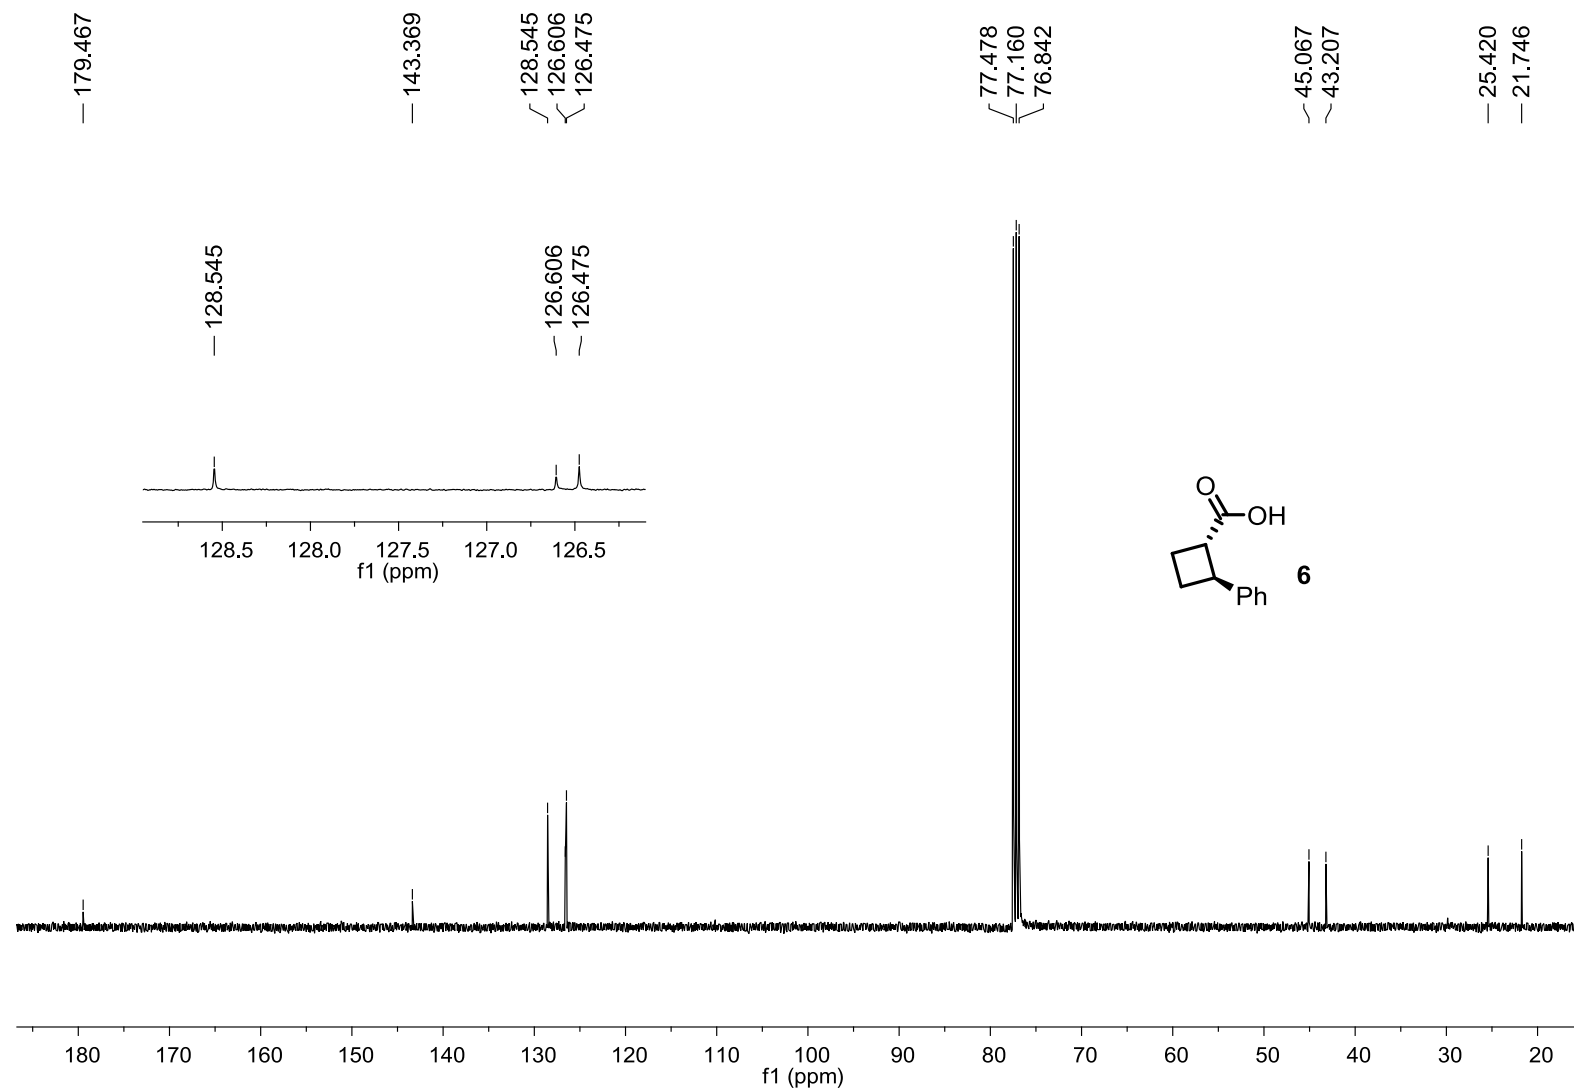

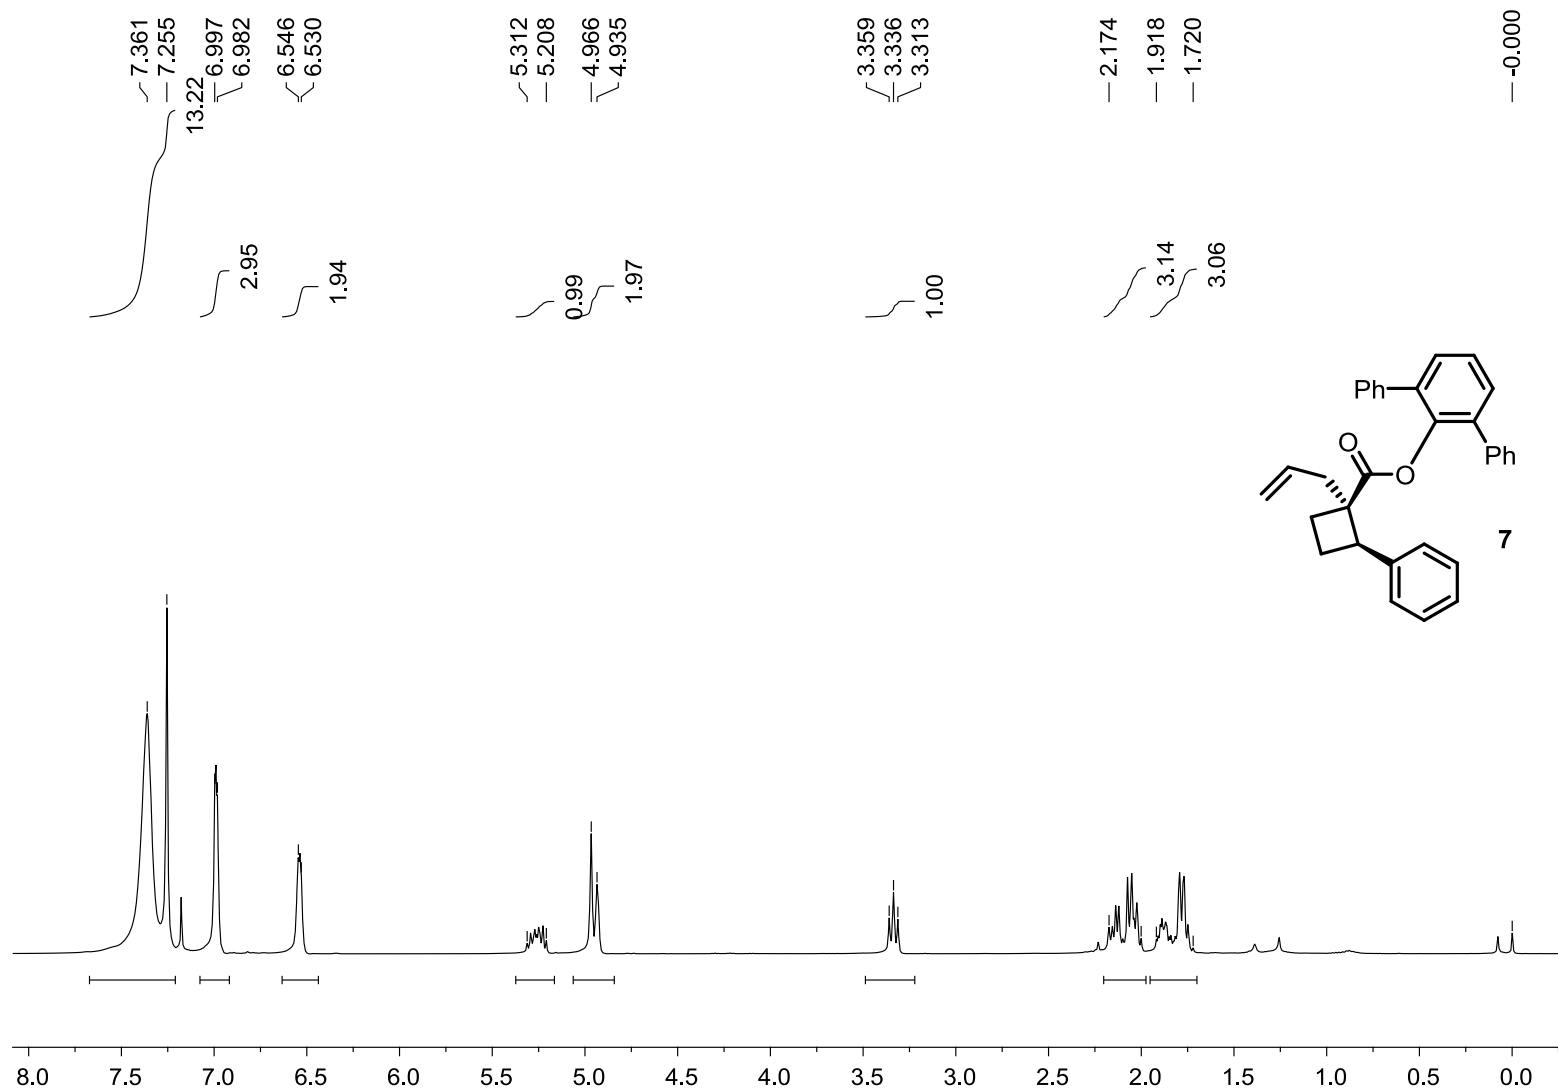

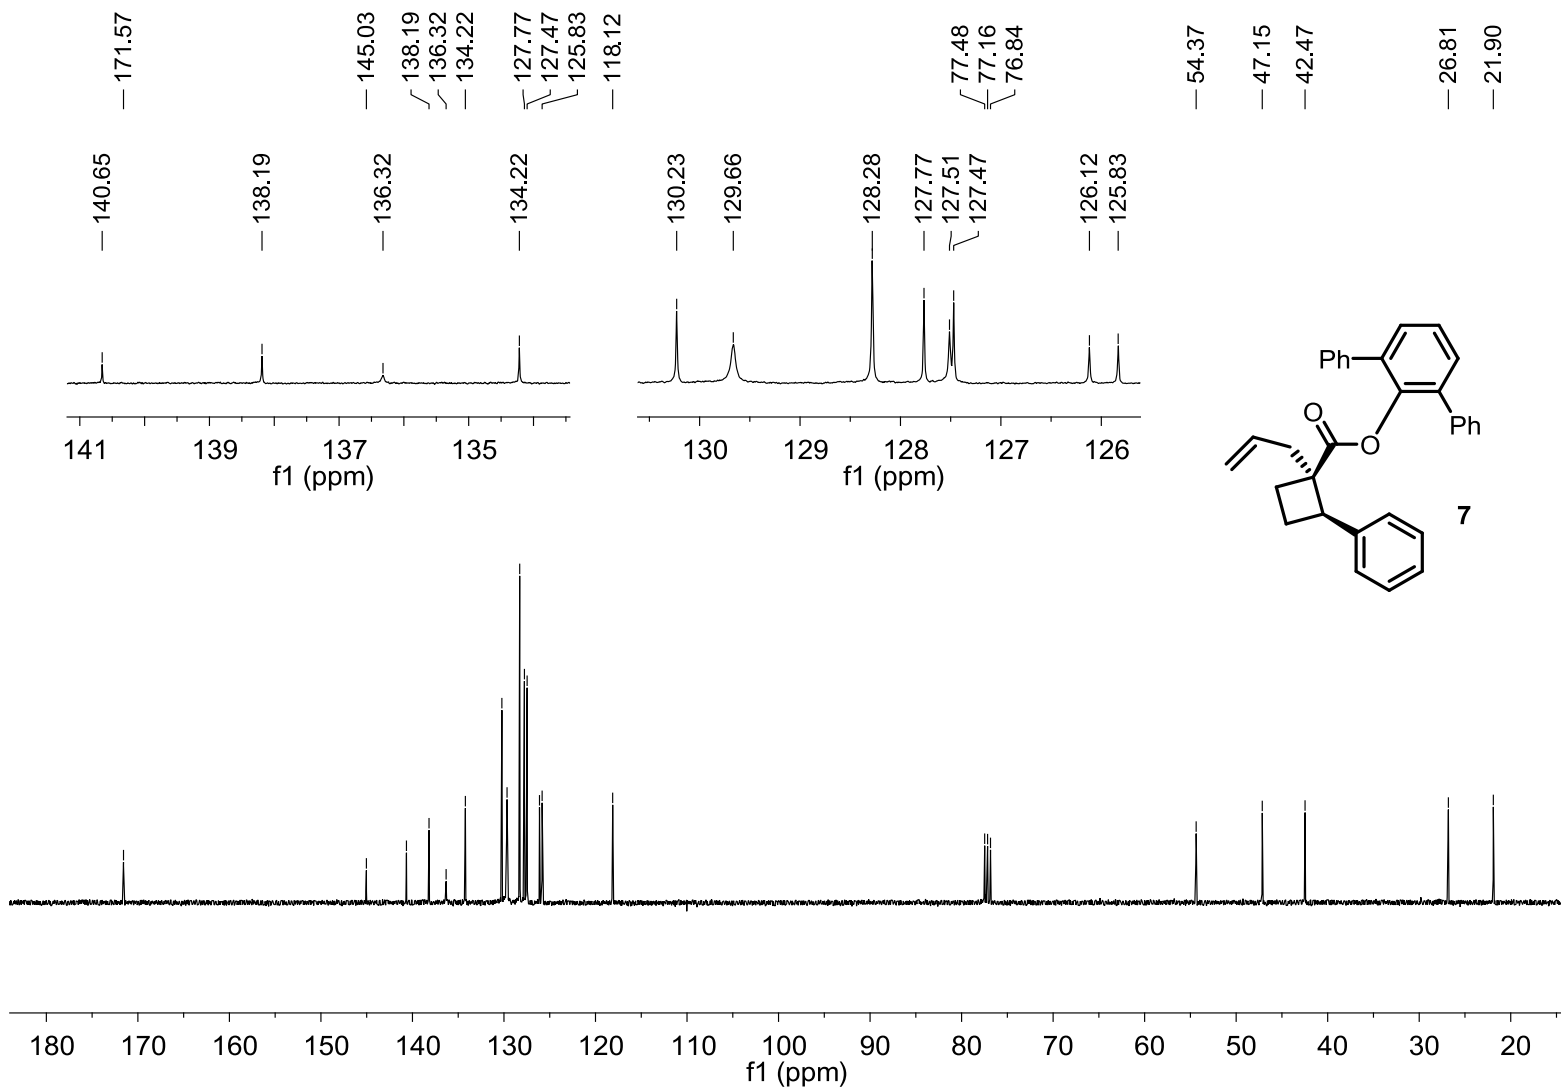

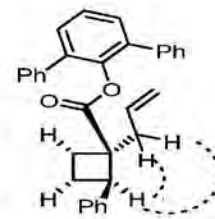

Key NOESY correlations for 7

----- = NOESY correlation

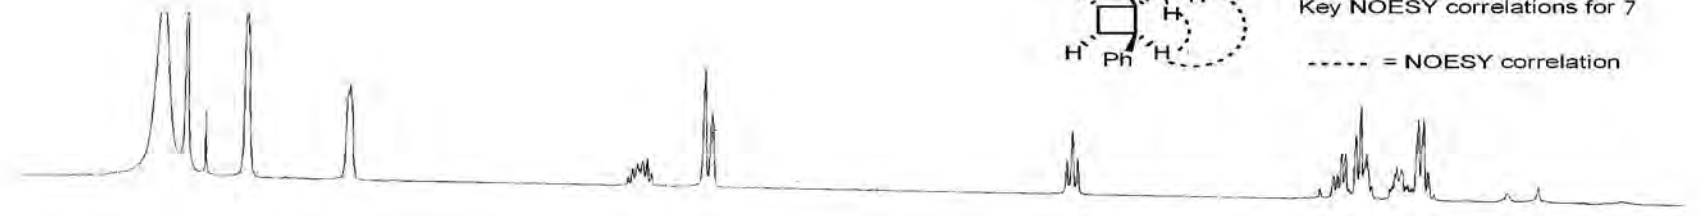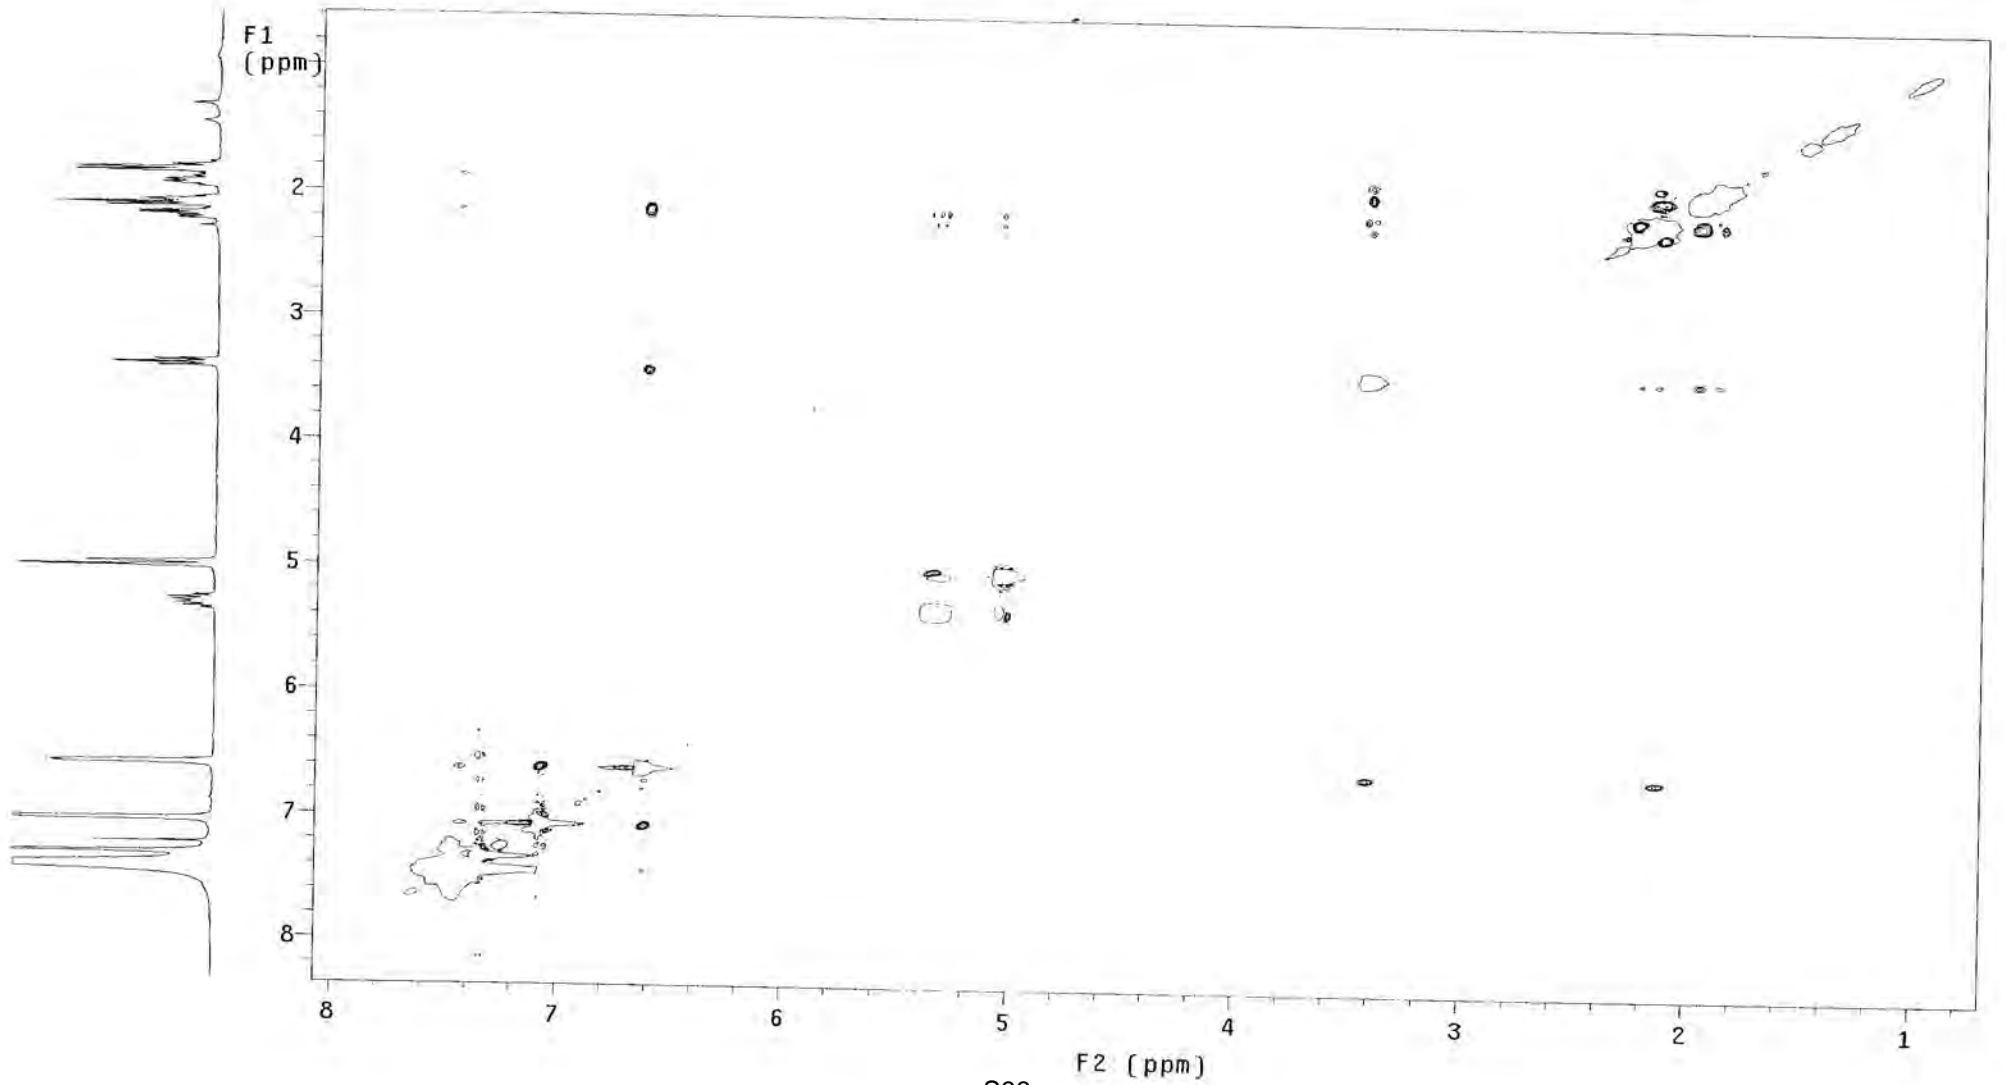

Supplement: c5cc02023a1.pdf [file c5cc02023a1.pdf]
